# Supplementary material for: A detailed investigation of the aza-Prins reaction
Source: Royal Society of Chemistry journal article supplement (doi:10.1039/b915797b), 2010-01-01

**EXPERIMENTAL SUPPORTING INFORMATION****The Indium Trichloride-Promoted Aza-Prins Reaction**

Adrian P. Dobbs,<sup>a,b\*</sup> Sebastien J.J. Guesné,<sup>b</sup> Robert J. Parker,<sup>b</sup> John Skidmore,<sup>c</sup> Richard A. Stephenson<sup>d</sup> and Mike B. Hursthouse<sup>d</sup>

<sup>a</sup>School of Biological and Chemical Sciences, Joseph Priestley Building, Queen Mary University of London, Mile End Road, London E1 4NS, United Kingdom.

<sup>b</sup>School of Chemistry, University of Exeter, Stocker Road, Exeter, EX4 4QD, United Kingdom.

<sup>c</sup>GlaxoSmithKline, New Frontiers Science Park (North), Harlow, Essex CM19 5AD, United Kingdom.

<sup>d</sup>EPSRC National Crystallographic Service, Chemistry, University of Southampton, Southampton SO17 1BJ, United Kingdom.

A.Dobbs@qmul.ac.uk

**Contents:**

|                                                                                                                                               |     |
|-----------------------------------------------------------------------------------------------------------------------------------------------|-----|
| <b>General Information</b>                                                                                                                    |     |
| <b>Table 1: Unsuccessful Lewis acid Screening Reactions</b>                                                                                   | 5   |
| Table 2. Unsuccessful aza-Prins reactions involving C1 substituted tosylamine                                                                 | 6   |
| <b>1. Preparation of alcohol-containing precursors</b>                                                                                        | 7   |
| ( <i>Z</i> )-Pent-3-en-1-ol                                                                                                                   | 7   |
| (±)-Hex-4-yn-2-ol                                                                                                                             | 7   |
| (±)-( <i>E</i> )-Hex-4-en-2-ol                                                                                                                | 8   |
| <b>General procedure for alcohol tosylation</b>                                                                                               | 9   |
| 4-(Toluene-4-sulfonyloxy)-but-1-ene <b>2</b>                                                                                                  | 9   |
| ( <i>Z</i> )-Pent-3-enyl 4-methylbenzenesulfonate <b>19</b>                                                                                   | 9   |
| ( <i>E</i> )-Pent-3-enyl 4-methylbenzenesulfonate <b>20</b>                                                                                   | 10  |
| 3-Methylbut-3-enyl 4-methylbenzenesulfonate <b>24</b>                                                                                         | 10  |
| 4-Methylpent-3-enyl 4-methylbenzenesulfonate <b>25</b>                                                                                        | 11  |
| (±)-( <i>E</i> )-Hex-4-en-2-yl 4-methylbenzenesulfonate <b>42</b>                                                                             | 11  |
| <b>General Procedure for the amination of a tosyl-protected/activated alcohol with 4-methylbenzenesulfonamide, catalysed by sodium iodide</b> | 12  |
| ( <i>Z</i> )-4-Methyl- <i>N</i> -(pent-3-enyl)benzenesulfonamide <b>21</b>                                                                    | 12  |
| ( <i>E</i> )-4-Methyl- <i>N</i> -(pent-3-enyl)benzenesulfonamide <b>22</b>                                                                    | 13  |
| 4-Methyl- <i>N</i> -(3-methylbut-3-enyl)benzenesulfonamide <b>24</b>                                                                          | 13  |
| 4-Methyl- <i>N</i> -(4-methylpent-3-enyl)benzenesulfonamide <b>25</b>                                                                         | 141 |
| (±)- <i>tert</i> -Butyl pent-4-en-2-yl(tosyl)carbamate <b>40</b>                                                                              | 14  |
| (±)-4-Methyl- <i>N</i> -(pent-4-en-2-yl)benzenesulfonamide <b>41</b>                                                                          | 15  |
| (±)-( <i>E</i> )- <i>N</i> -(Hex-4-en-2-yl)-4-methylbenzenesulfonamide <b>43</b>                                                              | 15  |

|                                                                                                                                                                                                                                                                                                                                                                                                                                                                                                                                                 |    |
|-------------------------------------------------------------------------------------------------------------------------------------------------------------------------------------------------------------------------------------------------------------------------------------------------------------------------------------------------------------------------------------------------------------------------------------------------------------------------------------------------------------------------------------------------|----|
| <b>General procedure for amination (tosyl displacement by primary amine)</b>                                                                                                                                                                                                                                                                                                                                                                                                                                                                    | 16 |
| <i>N</i> -Benzyl- <i>N</i> -(3-butenyl)amine <b>3</b>                                                                                                                                                                                                                                                                                                                                                                                                                                                                                           | 16 |
| Benzyl-(3-methyl-but-3-enyl)-amine <b>13</b>                                                                                                                                                                                                                                                                                                                                                                                                                                                                                                    | 16 |
| <b>General procedure for the iodine catalysed synthesis of homoallylic amines</b>                                                                                                                                                                                                                                                                                                                                                                                                                                                               | 18 |
| <i>N</i> -Benzyloxycarbonyl-(±)-1-benzylbut-3-enylamine <b>6</b>                                                                                                                                                                                                                                                                                                                                                                                                                                                                                | 18 |
| <i>N</i> -Benzyloxycarbonyl-(±)-1-heptylbut-3-enylamine <b>7</b>                                                                                                                                                                                                                                                                                                                                                                                                                                                                                | 18 |
| <b>4.5. General procedure for the aza-Prins reaction</b>                                                                                                                                                                                                                                                                                                                                                                                                                                                                                        | 20 |
| (2 <i>R</i> ,3 <i>R</i> ,4 <i>S</i> )-4-Chloro-2-heptyl-3-methyl-1-tosylpiperidine/(2 <i>S</i> ,3 <i>S</i> ,4 <i>R</i> )-4-Chloro-2-heptyl-3-methyl-1-tosylpiperidine and (2 <i>S</i> ,3 <i>R</i> )-3-(( <i>S</i> )-1-Chloroethyl)-2-heptyl-1-tosylpyrrolidine/(2 <i>R</i> ,3 <i>S</i> )-3-(( <i>R</i> )-1-Chloroethyl)-2-heptyl-1-tosylpyrrolidine                                                                                                                                                                                             | 20 |
| (2 <i>S</i> ,3 <i>R</i> )-3-(( <i>S</i> )-1-Chloroethyl)-2-heptyl-1-tosylpyrrolidine/(2 <i>R</i> ,3 <i>S</i> )-3-(( <i>R</i> )-1-Chloroethyl)-2-heptyl-1-tosylpyrrolidine                                                                                                                                                                                                                                                                                                                                                                       | 23 |
| (2 <i>S</i> ,3 <i>R</i> ,4 <i>S</i> )-4-Chloro-3-methyl-2-phenyl-1-tosylpiperidine/(2 <i>R</i> ,3 <i>S</i> ,4 <i>R</i> )-4-Chloro-3-methyl-2-phenyl-1-tosylpiperidine                                                                                                                                                                                                                                                                                                                                                                           | 25 |
| (2 <i>R</i> ,3 <i>R</i> ,4 <i>S</i> )-4-Chloro-3-methyl-2-phenethyl-1-tosylpiperidine, (2 <i>S</i> ,3 <i>S</i> ,4 <i>R</i> )-4-Chloro-3-methyl-2-phenethyl-1-tosylpiperidine, (2 <i>S</i> ,3 <i>R</i> )-3-(( <i>S</i> )-1-Chloroethyl)-2-phenethyl-1-tosylpyrrolidine and (2 <i>R</i> ,3 <i>S</i> )-3-(( <i>R</i> )-1-Chloroethyl)-2-phenethyl-1-tosylpyrrolidine                                                                                                                                                                               | 27 |
| (2 <i>R</i> ,3 <i>R</i> ,4 <i>S</i> )-4-Chloro-2-cyclohexyl-3-methyl-1-tosylpiperidine/(2 <i>S</i> ,3 <i>S</i> ,4 <i>R</i> )-4-Chloro-2-cyclohexyl-3-methyl-1-tosylpiperidine and (2 <i>S</i> ,3 <i>R</i> )-3-(( <i>S</i> )-1-Chloroethyl)-2-cyclohexyl-1-tosylpyrrolidine/(2 <i>R</i> ,3 <i>S</i> )-3-(( <i>R</i> )-1-Chloroethyl)-2-cyclohexyl-1-tosylpyrrolidine                                                                                                                                                                             | 32 |
| (2 <i>S</i> ,3 <i>R</i> ,4 <i>S</i> )-Ethyl-4-chloro-3-methyl-1-tosylpiperidine-2-carboxylate/(2 <i>R</i> ,3 <i>S</i> ,4 <i>R</i> )-Ethyl-4-chloro-3-methyl-1-tosylpiperidine-2-carboxylate                                                                                                                                                                                                                                                                                                                                                     | 37 |
| (2 <i>R</i> ,3 <i>R</i> ,4 <i>S</i> )-4-Chloro-3-ethyl-2-heptyl-1-tosylpiperidine/(2 <i>S</i> ,3 <i>S</i> ,4 <i>R</i> )-4-Chloro-3-ethyl-2-heptyl-1-tosylpiperidine and (2 <i>S</i> ,3 <i>R</i> )-3-(( <i>S</i> )-1-Chloropropyl)-2-heptyl-1-tosylpyrrolidine/(2 <i>R</i> ,3 <i>S</i> )-3-(( <i>R</i> )-1-Chloropropyl)-2-heptyl-1-tosylpyrrolidine                                                                                                                                                                                             | 38 |
| (2 <i>R</i> ,3 <i>R</i> ,4 <i>S</i> )-4-Chloro-3-ethyl-2-phenethyl-1-tosylpiperidine/(2 <i>S</i> ,3 <i>S</i> ,4 <i>R</i> )-4-Chloro-3-ethyl-2-phenethyl-1-tosylpiperidine, (2 <i>S</i> ,3 <i>R</i> )-3-(( <i>S</i> )-1-Chloropropyl)-2-phenethyl-1-tosylpyrrolidine and (2 <i>R</i> ,3 <i>S</i> )-3-(( <i>R</i> )-1-Chloropropyl)-2-phenethyl-1-tosylpyrrolidine.                                                                                                                                                                               | 43 |
| (2 <i>R</i> ,3 <i>R</i> ,4 <i>S</i> )-4-chloro-2-cyclohexyl-3-ethyl-1-tosylpiperidine/(2 <i>S</i> ,3 <i>S</i> ,4 <i>R</i> )-4-chloro-2-cyclohexyl-3-ethyl-1-tosylpiperidine, (2 <i>S</i> ,3 <i>R</i> )-3-(( <i>S</i> )-1-chloropropyl)-2-cyclohexyl-1-tosylpyrrolidine/(2 <i>R</i> ,3 <i>S</i> )-3-(( <i>R</i> )-1-chloropropyl)-2-cyclohexyl-1-tosylpyrrolidine and (2 <i>S</i> ,3 <i>S</i> , <i>E</i> )-2-cyclohexyl-3-(prop-1-enyl)-1-tosylpyrrolidine/(2 <i>S</i> ,3 <i>S</i> , <i>E</i> )-2-cyclohexyl-3-(prop-1-enyl)-1-tosylpyrrolidine. | 47 |
| (2 <i>R</i> ,3 <i>S</i> ,4 <i>S</i> )-4-Chloro-2-heptyl-3-methyl-1-tosylpiperidine/(2 <i>S</i> ,3 <i>R</i> ,4 <i>R</i> )-4-Chloro-2-heptyl-3-methyl-1-tosylpiperidine                                                                                                                                                                                                                                                                                                                                                                           | 52 |
| (2 <i>R</i> ,3 <i>S</i> ,4 <i>S</i> )-4-Chloro-3-methyl-2-phenethyl-1-tosylpiperidine/(2 <i>S</i> ,3 <i>R</i> ,4 <i>R</i> )-4-Chloro-3-methyl-2-phenethyl-1-tosylpiperidine                                                                                                                                                                                                                                                                                                                                                                     | 55 |
| (2 <i>S</i> ,3 <i>R</i> )-3-(( <i>S</i> )-1-Chloroethyl)-2-cyclohexyl-1-tosylpyrrolidine/(2 <i>R</i> ,3 <i>S</i> )-3-(( <i>R</i> )-1-Chloroethyl)-2-cyclohexyl-1-tosylpyrrolidine                                                                                                                                                                                                                                                                                                                                                               | 57 |
| (2 <i>S</i> ,3 <i>S</i> ,4 <i>S</i> )-Ethyl-4-chloro-3-methyl-1-tosylpiperidine-2-carboxylate/(2 <i>R</i> ,3 <i>R</i> ,4 <i>R</i> )-Ethyl-4-chloro-3-methyl-1-tosylpiperidine-2-carboxylate                                                                                                                                                                                                                                                                                                                                                     | 60 |
| (2 <i>S</i> ,3 <i>S</i> )-2-Phenethyl-3-(prop-1-en-2-yl)-1-tosylpyrrolidine/(2 <i>R</i> ,3 <i>R</i> )-2-Phenethyl-3-(prop-1-en-2-yl)-1-tosylpyrrolidine and (±)-2-Phenethyl-3-(propan-2-ylidene)-1-tosylpyrrolidine                                                                                                                                                                                                                                                                                                                             | 62 |
| (2 <i>S</i> ,3 <i>S</i> )-2-Heptyl-3-(prop-1-en-2-yl)-1-tosylpyrrolidine/(2 <i>R</i> ,3 <i>R</i> )-2-Heptyl-3-(prop-1-en-2-yl)-1-tosylpyrrolidine and (±)-2-Heptyl-3-(propan-2-ylidene)-1-tosylpyrrolidine                                                                                                                                                                                                                                                                                                                                      | 65 |
| (±)-4-Methyl-2-phenethyl-1-tosyl-1,2,3,6-tetrahydropyridine and (±)-4-Methyl-2-phenethyl-1-tosyl-1,2,5,6-tetrahydropyridine                                                                                                                                                                                                                                                                                                                                                                                                                     | 67 |
| (±)-2-Heptyl-4-methyl-1-tosyl-1,2,3,6-tetrahydropyridine and (±)-2-Heptyl-4-methyl-1-tosyl-1,2,5,6-tetrahydropyridine                                                                                                                                                                                                                                                                                                                                                                                                                           | 70 |

**General:**

All chemicals were purified by distillation where appropriate. Diethyl ether and tetrahydrofuran were predried over sodium wire and distilled from sodium under nitrogen, with benzophenone ketyl as indicator directly in the reaction vessel. Dichloromethane was distilled over calcium hydride and kept under nitrogen. All reactions were carried out under anhydrous conditions and in an atmosphere of nitrogen unless otherwise stated, using flame-dried glassware with all transfers performed using plastic syringes and needles.

All column chromatography was carried out using Fluka Silica Gel 60 (220-440 mesh) (Brockmann 2-3). TLC analysis was carried out using aluminium-backed plates coated with Merck Kieselgel 60 GF254. Plates were visualised by ultraviolet light and aqueous potassium permanganate spray ( $\text{KMnO}_4:\text{K}_2\text{CO}_3:\text{water}$  6:1:100, w/w/v). Another purification technique involved the use of Mass-Directed-Auto-Prep (MDAP), a form of preparative HPLC, performed in the laboratories at GlaxoSmithKline®, Harlow (confidential).

Melting points were determined using a Gallenkamp melting point apparatus.

Optical rotations were measured on an Optical Activity Ltd. AA-1000 polarimeter, values are quoted in  $10^{-1} \text{ cm}^2 \text{ g}^{-1}$ .

Infrared spectra were recorded in the range  $4000\text{-}600 \text{ cm}^{-1}$  on a Nicolet MAGNA 550 FT-IR spectrometer with internal calibration. Spectra were recorded as thin films between NaCl plates, as KBr disks or as Nujol® pastes.

Proton ( $^1\text{H}$ ) and carbon ( $^{13}\text{C}$ ) NMR spectra were recorded at 300 MHz or at 400 MHz and at 75.5 MHz or 100.6 MHz respectively on JNM-LA300 (300 MHz and 75.5 MHz) and on a Bruker ACF-300 or a Advance DRX 400 spectrometers. Chemical shift values ( $\delta_{\text{H}}$  and  $\delta_{\text{C}}$ ) are reported as values in parts per million (ppm) from the residual protic solvent as the internal standard reference for  $^1\text{H}$  NMR spectra and from the solvent peaks for  $^{13}\text{C}$  NMR.  $^1\text{H}$  NMR spectra are recorded in the form (integration; multiplicity; coupling constants; assignment). Multiplicities are given as s-singlet, d-doublet, t-triplet, q-quartet, m-multiplet and bs-broad signal. Coupling constants ( $J$  values) are quoted to one decimal place with values in Hz.  $^{13}\text{C}$  NMR spectra are recorded in the form  $\delta_{\text{C}}$  (assignment).

High and low resolution mass spectra were recorded on a Kratos profile instrument or on a VG Analytical ZAB-E instrument (EPSRC Mass Spectrometry Service, Swansea) or on a ThermoQuest Trace GC 2000 series and Agilent 6890 Series GC system, Micromas GCT. Mass spectra data were also acquired using LCMS analysis, performed in the laboratories at GlaxoSmithKline®, Harlow (confidential).

Full characterisation of a compound within this experimental includes, but is not limited to, data on IR,  $^1\text{H}$  NMR,  $^{13}\text{C}$  NMR, low-resolution mass spectra and high-resolution mass spectra. Compounds that have been characterised fully in the literature contain two or more from the previous list. On some occasions, it was not possible to obtain all required data; the reasons for this have been alluded to in the main body of this thesis. Crystal structures have been deposited at the Cambridge Crystallographic Data Centre (CCDC).

**Table 1: Unsuccessful Lewis acid Screening Reactions**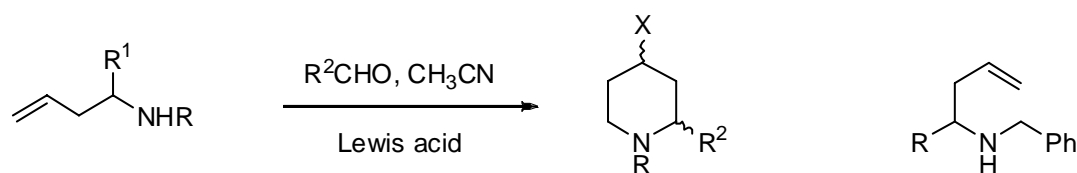

| Entry | Lewis Acid                        | R            | R <sup>1</sup>                           | R <sup>2</sup>                           | X                        | Temp      | Time (h)                 | Yield(%) |   |
|-------|-----------------------------------|--------------|------------------------------------------|------------------------------------------|--------------------------|-----------|--------------------------|----------|---|
| 1     | InCl <sub>3</sub>                 | <i>n</i> -Bu | H                                        | CO <sub>2</sub> Et                       | Cl                       | reflux    | 48                       | 0        |   |
| 2     |                                   |              | H                                        | Bn                                       |                          |           | 48                       | 0        |   |
| 3     | In(OTf) <sub>3</sub>              | Bn           | H                                        | CO <sub>2</sub> Et                       | OTf                      |           | 48                       | 0        |   |
| 4     |                                   |              | H                                        | Bn                                       |                          |           | 72                       | 0        |   |
| 5     | AlCl <sub>3</sub>                 | Bn           | H                                        | <i>n</i> -C <sub>5</sub> H <sub>11</sub> | Cl                       |           | 72                       | 0        |   |
| 6     |                                   |              | H                                        | Bn                                       |                          |           | 24                       | 0        |   |
| 7     | TiCl <sub>4</sub> <sup>a</sup>    | Bn           | H                                        | <i>n</i> -C <sub>5</sub> H <sub>11</sub> | Cl                       |           | 24                       | 0        |   |
| 8     |                                   |              | H                                        | Bn                                       |                          |           | 24                       | 0        |   |
| 9     | TMSOTf                            | Bn           | H                                        | <i>n</i> -C <sub>5</sub> H <sub>11</sub> | OTf                      |           | -30°C to rt <sup>b</sup> | 24       | 0 |
| 10    |                                   |              | H                                        | Bn                                       |                          |           |                          | 72       | 0 |
| 11    | BF <sub>3</sub> ·OEt <sub>2</sub> | Bn           | H                                        | <i>n</i> -C <sub>5</sub> H <sub>11</sub> | F                        | 72        | 0                        |          |   |
| 12    | InCl <sub>3</sub>                 | CBz          | <i>n</i> -C <sub>7</sub> H <sub>15</sub> | <i>n</i> -C <sub>5</sub> H <sub>11</sub> | Cl                       | reflux    | 48                       | 0        |   |
| 13    |                                   |              | Bn                                       | Bn                                       |                          |           | 72                       | 0        |   |
| 14    | In(OTf) <sub>3</sub>              | CBz          | <i>n</i> -C <sub>5</sub> H <sub>11</sub> | OTf                                      | 72                       |           | 0                        |          |   |
| 15    |                                   |              | Bn                                       |                                          | 72                       |           | 0                        |          |   |
| 16    | BF <sub>3</sub> ·OEt <sub>2</sub> | CBz          | <i>n</i> -C <sub>5</sub> H <sub>11</sub> | F                                        | -30°C to rt <sup>b</sup> |           | 72                       | 0        |   |
| 17    |                                   |              | Bn                                       |                                          |                          |           | 72                       | 0        |   |
| 18    | TMSOTf                            | CBz          | <i>n</i> -C <sub>5</sub> H <sub>11</sub> | OTf                                      | 72                       |           | 0                        |          |   |
| 19    |                                   |              | Bn                                       |                                          |                          |           |                          | 72       | 0 |
| 20    | SnBr <sub>4</sub> <sup>c</sup>    | CBz          | <i>n</i> -C <sub>5</sub> H <sub>11</sub> | Br                                       | -78°C to                 |           | 48                       | 0        |   |
| 21    |                                   |              | 0 °C to                                  |                                          |                          |           |                          |          |   |
| 22    |                                   |              |                                          | CO <sub>2</sub> Et                       |                          | reflux in | 48                       | 0        |   |
|       |                                   |              |                                          |                                          |                          | DCM       |                          |          |   |

<sup>a</sup>Based on aube<sup>b</sup>Decomposition if initial addition performed at 0 or above<sup>c</sup>Based on Hanessian

**Table 2. Unsuccessful aza-Prins reactions involving C1 substituted tosylamine.**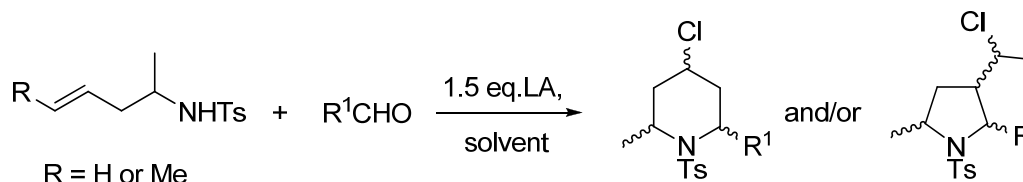

| Entry | R <sup>1</sup>                           | Lewis Acid                     | Solvent            | Temp / °C     | Time                   | Comment                        |
|-------|------------------------------------------|--------------------------------|--------------------|---------------|------------------------|--------------------------------|
|       |                                          |                                |                    |               |                        |                                |
| 1     | <i>n</i> -C <sub>7</sub> H <sub>15</sub> | InCl <sub>3</sub>              | DCM                | Rt and reflux | 48 h, then 24 h reflux | No reaction, SM remained       |
| 2     | (CH <sub>2</sub> ) <sub>2</sub> Ph       | InCl <sub>3</sub>              | DCM                | Rt            | 48 h                   | No reaction, SM remained       |
| 3     | <i>c</i> -Hex                            | InCl <sub>3</sub>              | DCM                | Rt            | 48 h                   | No reaction, SM remained       |
| 4     | <i>n</i> -C <sub>7</sub> H <sub>15</sub> | TMSOTf                         | DCM                | Rt            | 48 h                   | No reaction, SM remained       |
| 5     | (CH <sub>2</sub> ) <sub>2</sub> Ph       | InCl <sub>3</sub>              | CH <sub>3</sub> CN | Rt and reflux | 48 h, then 72 h reflux | No reaction, SM remained       |
| 6     | (CH <sub>2</sub> ) <sub>2</sub> Ph       | FeCl <sub>3</sub><br>anhydrous | DCM                | Rt            | 70 h                   | 90% SM consumed, product trace |
|       |                                          |                                |                    |               |                        |                                |
| 7     | (CH <sub>2</sub> ) <sub>2</sub> Ph       | InCl <sub>3</sub>              | DCM                | Rt and reflux | 72 h, then 72 h reflux | No reaction, SM remained       |
| 8     | (CH <sub>2</sub> ) <sub>2</sub> Ph       | InCl <sub>3</sub>              | DCM                | Rt and reflux | 24 h, then 24 h reflux | No reaction, SM remained       |
| 9     | (CH <sub>2</sub> ) <sub>2</sub> Ph       | InCl <sub>3</sub>              | CH <sub>3</sub> CN | Reflux        | 72 h                   | No reaction, SM remained       |

## 1. Preparation of alcohol-containing precursors

### (Z)-Pent-3-en-1-ol

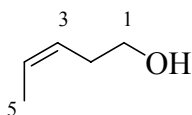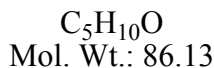

A solution of pent-3-yn-1-ol (5.00 g, 59.44 mmol) in methanol (85 mL) was injected into a hydrogenation flask containing a prehydrogenated suspension of Lindlar's catalyst (425 mg) in methanol (10 mL). The hydrogenation was complete in 17 hours. The mixture was filtered through celite, washed with diethyl ether (10 mL) and concentrated *in vacuo*. This gave a pale yellow oil, which was purified by distillation at atmospheric pressure (50 °C, 760mmHg) to give the *title compound* (4.02 g, 46.69 mmol, 79%) as a colourless oil.

$\delta_{\text{H}}$  (300 MHz;  $\text{CDCl}_3$ ) 5.66-5.53 (1H, m, H-C3), 5.43-5.31 (1H, m, H-C4), 3.61 (2H, t,  $J$  6.6, H-C1), 2.34-2.26 (2H, m, H-C2), 2.11 (1H, bs, H-OH), 1.64-1.59 (3H, m, H-C5);  $\delta_{\text{C}}$  (75.5 MHz;  $\text{CDCl}_3$ ) 126.9 (C3), 126.0 (C4), 62.0 (C1), 30.3 (C2), 12.8 (C5).

### (±)-Hex-4-yn-2-ol

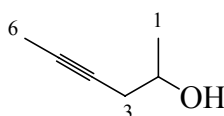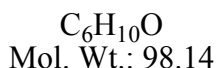

A round-bottomed flask was wrapped in aluminium foil and equipped with a dropping funnel and a thermometer. The flask was charged with (±)-pent-4-yn-2-ol (5.00 g, 59.43 mmol, 1.00 eq.) and tetrahydrofuran (96 mL). The resulting solution was cooled to -78 °C and a 2.5 M solution of *n*-butyllithium in hexane (47 mL, 118.86 mmol, 2.00 eq.) was added dropwise over 30 minutes. The mixture was stirred at -78 °C for a further 90 minutes and iodomethane (18.6 mL, 297.15 mmol, 5.00 eq.) was added dropwise. The mixture was allowed to warm to room temperature for 1 hour and 1.0 M hydrochloric acid (100 mL) was added dropwise over 30 minutes. The mixture was stirred for a further 30 minutes at room temperature, the organic layer separated and the aqueous layer extracted with diethyl ether (3 x 100 mL). The combined organic layers were dried over magnesium sulfate, filtered and concentrated *in vacuo*. This afforded a yellow oil, which was purified by distillation under reduced pressure (125 °C, 226 mmHg) to give the *title compound* (3.10 g, 31.59 mmol, 53%) as a colourless oil.

$\delta_{\text{H}}$  (300 MHz;  $\text{CDCl}_3$ ) 3.88-3.77 (1H, m, H-C2), 2.37 (1H, bs, H-OH), 2.28-2.18 (2H, m, H-C3), 1.75 (3H, t,  $J$  2.2, H-C6), 1.17 (3H, d,  $J$  6.2, H-C1);  $\delta_{\text{C}}$  (75.5 MHz;  $\text{CDCl}_3$ ) 78.2 (C4), 75.3 (C3), 66.4 (C2), 29.2 (C3), 22.1 (C1), 3.4 (C6). All other data in agreement with literature values.

**(±)-(E)-Hex-4-en-2-ol**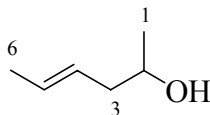

$C_6H_{12}O$   
Mol. Wt.: 100.16

Following the general procedure X, (±)-hex-4-yn-2-ol (966 mg, 9.84 mmol) gave a pale yellow oil, which was purified by distillation under reduced pressure (120 °C, 213mmHg) to give the *title compound* (590 mg, 5.89 mmol, 60%) as a colourless oil.

$\delta_H$  (300 MHz;  $CDCl_3$ ) 5.62-5.48 (1H, m, H-C4), 5.47-5.35 (1H, m, H-C5), 3.82-3.70 (1H, m, H-C2), 2.24-2.12 (1H, m, H-C3), 2.12-1.99 (1H, m, H-C3), 1.74 (1H, bs, H-OH), 1.70-1.65 (3H, m, H-C6), 1.17 (3H, d, *J* 6.2, H-C1). All other data in agreement with literature values.



### General procedure for alcohol tosylation

A round-bottomed flask was charged with homoallylic alcohol (69.73 mmol, 1.00 eq.) and dichloromethane (140 mL). The resulting solution was stirred and cooled to 0 °C before adding sequentially 4-dimethylaminopyridine (5.08 g, 41.84 mmol, 0.60 eq.) and *p*-toluenesulfonyl chloride (15.96 g, 83.68 mmol, 1.20 eq.) portionwise and dropwise triethylamine (9.82 mL, 69.73 mmol, 1.00 eq.). The resulting solution was stirred at 0 °C until TLC showed complete consumption of starting material. The resulting suspension was diluted with diethyl ether (150 mL), stirred for a further 30 minutes and the precipitate removed by filtration. The solution was then washed sequentially with 10% aqueous copper sulphate (2 x 75 mL), 10% aqueous sodium hydrogen carbonate (2 x 75 mL) and a saturated aqueous sodium chloride solution (60 mL). The combined organic layers were dried over magnesium sulfate, filtered, and concentrated *in vacuo*.

### 4-(Toluene-4-sulfonyloxy)-but-1-ene **2**

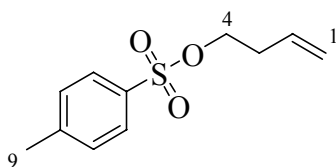

C<sub>11</sub>H<sub>14</sub>O<sub>3</sub>S  
Mol. Wt.: 226.29

Following the general procedure A, 3-buten-1-ol (3.35 g, 46.40 mmol) gave after 22 hours of stirring, a yellow oil which was purified by flash column chromatography (50% petroleum ether 50% diethyl ether) to give the *title compound* (8.22 g, 36.30 mmol, 78%) as a colourless oil.

$\delta_{\text{H}}$  (300 MHz; CDCl<sub>3</sub>) 7.80 (2H, d, *J* 8.3, H-C6), 7.36 (2H, d, *J* 8.3, H-C7), 5.75-5.61 (1H, m, H-C2), 5.13-5.07 (2H, m, H-C1), 4.07 (2H, t, *J* 6.7, H-C4), 2.45 (3H, s, H-C9), 2.44-2.39 (2H, m, H-C3);  $\delta_{\text{C}}$  (75.5 MHz; CDCl<sub>3</sub>) 145.2 (C8), 133.5 (C5), 132.8 (C2), 130.3 (C7), 128.3 (C6), 118.7 (C1), 69.8 (C4), 33.6 (C3), 22.1 (C9); *m/z* (CI) 227 (MH<sup>+</sup>, 100), 173 (95), 155 (55).

### (*Z*)-Pent-3-enyl 4-methylbenzenesulfonate **19**

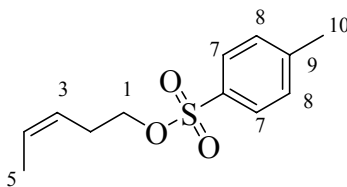

C<sub>12</sub>H<sub>16</sub>O<sub>3</sub>S  
Mol. Wt.: 240.32

Following the general procedure X, (*Z*)-pent-3-en-1-ol (3.99 g, 46.32 mmol) was consumed based on analysis by TLC after 20 hours of stirring at 0 °C. The work up afforded a yellow oil, which was purified by flash column chromatography (90% petroleum ether, 10% ethyl acetate) to give the *title compound* (9.78 g, 40.71 mmol, 88%) as a colourless oil.

$\delta_{\text{H}}$  (300 MHz;  $\text{CDCl}_3$ ) 7.79 (2H, d,  $J$  8.3, H-C7), 7.34 (2H, d,  $J$  8.3, H-C8), 5.62-5.49 (1H, m, H-C3), 5.31-5.19 (1H, m, H-C4), 4.01 (2H, t,  $J$  7.0, H-C1), 2.45 (3H, s, H-C10), 2.44-2.35 (2H, m, H-C2), 1.59-1.54 (3H, m, H-C5);  $m/z$  (CI) 241 ( $\text{MH}^+$ , 17), 213 (20), 173 (100).

### (*E*)-Pent-3-enyl 4-methylbenzenesulfonate 20

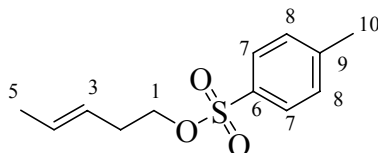

$\text{C}_{12}\text{H}_{16}\text{O}_3\text{S}$   
Mol. Wt.: 240.32

Following the general procedure X, (*E*)-pent-3-en-1-ol (2.10 g, 24.38 mmol) was consumed based on analysis by TLC after 20 hours of stirring at 0 °C. The work up afforded a yellow oil, which was purified by flash column chromatography (90% petroleum ether, 10% ethyl acetate) to give the *title compound* (3.32 g, 13.82 mmol, 57%) as a colourless oil.

$\delta_{\text{H}}$  (300 MHz;  $\text{CDCl}_3$ ) 7.77 (2H, d,  $J$  8.3, H-C7), 7.33 (2H, d,  $J$  8.3, H-C8), 5.55-5.40 (1H, m, H-C3), 5.30-5.17 (1H, m, H-C4), 3.99 (2H, t,  $J$  6.8, H-C1), 2.44 (3H, s, H-C10), 2.34-2.26 (2H, m, H-C2), 1.63-1.57 (3H, m, H-C5);  $m/z$  (CI) 241 ( $\text{MH}^+$ , 15), 213 (20), 173 (100).

### 3-Methylbut-3-enyl 4-methylbenzenesulfonate 24

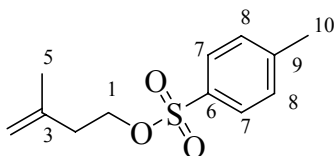

$\text{C}_{12}\text{H}_{16}\text{O}_3\text{S}$   
Mol. Wt.: 240.32

Following the general procedure X, 3-methylbut-3-en-1-ol (6.01 g, 69.73 mmol) was consumed based on analysis by TLC after 48 hours of stirring at 0 °C. The work up gave the *title compound* (12.63 g, 52.55 mmol, 75%) as a yellow oil which was used in the next step without any further purification.

$\delta_{\text{H}}$  (300 MHz;  $\text{CDCl}_3$ ) 7.77 (2H, d,  $J$  8.3, H-C7), 7.33 (2H, d,  $J$  8.3, H-C8), 4.77 (1H, s, H-C4), 4.66 (1H, s, H-C4), 4.10 (2H, t,  $J$  6.8, H-C1), 2.43 (3H, s, H-C10), 2.33 (2H, t,  $J$  6.8, H-C2), 1.64 (3H, s, H-C5);  $m/z$  (CI) 241 ( $\text{MH}^+$ , 90), 173 (72), 137 (100).

**4-Methylpent-3-enyl 4-methylbenzenesulfonate 25**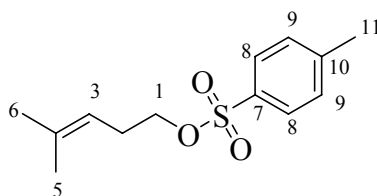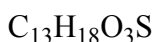

Mol. Wt.: 254.35

Following the general procedure X, 4-methylpent-3-en-1-ol (250 mg, 2.50 mmol) was consumed based on analysis by TLC after 20 hours of stirring at 0 °C. The work up gave the *title compound* (630 mg, 2.48 mmol, 99%) as a yellow oil which was used in the next step without any further purification.

$\delta_{\text{H}}$  (300 MHz;  $\text{CDCl}_3$ ) 7.78 (2H, d,  $J$  8.3, H-C8), 7.34 (2H, d,  $J$  8.3, H-C9), 4.99-4.91 (1H, m, H-C3), 3.97 (2H, t,  $J$  7.1, H-C1), 2.45 (3H, s, H-C11), 2.37-2.28 (2H, m, H-C2), 1.65 (3H, s, H-C6), 1.55 (3H, s, H-C5);  $m/z$  (CI) 255 ( $\text{MH}^+$ , 30), 173 (100), 155 (20).

**(±)-(E)-Hex-4-en-2-yl 4-methylbenzenesulfonate 42**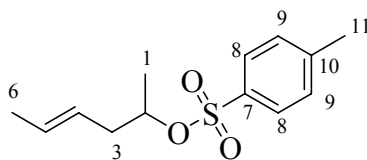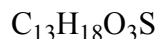

Mol. Wt.: 254.35

Following the general procedure, (±)-(E)-hex-4-en-2-ol (590 mg, 5.90 mmol) was consumed based on analysis by TLC after 40 hours of stirring at 0 °C. The work up afforded a yellow oil, which was purified by flash column chromatography (90% hexane, 10% ethyl acetate) to give the *title compound* (374 mg, 1.47 mmol, 25%) as a colourless oil.

$\delta_{\text{H}}$  (300 MHz;  $\text{CDCl}_3$ ) 7.78 (2H, d,  $J$  8.2, H-C8), 7.33 (2H, d,  $J$  8.2, H-C9), 5.49-5.35 (1H, m, H-C4), 5.20-5.07 (1H, m, H-C5), 4.61-4.50 (1H, m, H-C2), 2.44 (3H, s, H-C11), 2.32-2.12 (2H, m, H-C3), 1.58-1.53 (3H, m, H-C6), 1.25 (3H, d,  $J$  6.3, H-C1);

$\delta_{\text{C}}$  (75.5 MHz;  $\text{CDCl}_3$ ) 144.3 (C10), 134.4 (C7), 129.6 (C9), 128.3 (C4), 127.7 (C8), 124.7 (C5), 80.1 (C2), 39.6 (C3), 21.6 (C11), 20.4 (C1), 17.9 (C6);

**General Procedure for the amination of a tosyl-protected/activated alcohol with 4-methylbenzenesulfonamide, catalysed by sodium iodide.**

A round-bottomed flask fitted with a reflux condenser was charged with 4-methylbenzenesulfonamide (27.98 g, 160.38 mmol, 2.30 eq.), finely powdered potassium hydroxide (5.06 g, 90.65 mmol, 1.30 eq.) and dimethylsulfoxide (87 mL). The resulting suspension was heated to 50 °C and stirred for 2 hours. The resulting solution was cooled to room temperature and a tosylated alcohol derivative (69.73 mmol, 1.00 eq.) in dimethylsulfoxide (10 mL) added dropwise followed by sodium iodide (3.15 g, 20.92 mmol, 0.30 eq.) in one portion. The mixture was heated to 50 °C and stirred until TLC showed full consumption of starting material. The mixture was cooled to room temperature, ice cold water (100 mL) added, the organic layer separated, and the aqueous layer extracted with dichloromethane (3 x 50 mL). The combined organic layers were washed with a 15 % aqueous solution of potassium hydroxide (100 mL), water (100 mL) and a saturated aqueous solution of sodium chloride (100 mL). The organic layer was dried over magnesium sulfate, filtered and concentrated *in vacuo*.

**(Z)-4-Methyl-N-(pent-3-enyl)benzenesulfonamide 21**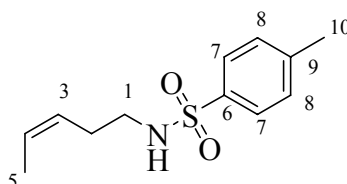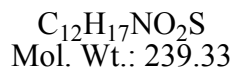

Following the general procedure X, (Z)-pent-3-enyl 4-methylbenzenesulfonate (1.00 g, 4.16 mmol) was consumed based on analysis by TLC after 20 hours of stirring at 50 °C. The work-up afforded a yellow oil, which was purified by flash column chromatography (80% hexane, 20% ethyl acetate) to give the *title compound* (0.93g, 3.89 mmol, 94%) as a colourless oil.

$\nu_{\text{max}}(\text{neat})/\text{cm}^{-1}$  3282, 2924, 1598;  $\delta_{\text{H}}$  (300 MHz;  $\text{CDCl}_3$ ) 7.74 (2H, d,  $J$  8.3, H-C7), 7.31 (2H, d,  $J$  8.3, H-C8), 5.64-5.50 (1H, m, H-C3), 5.25-5.13 (1H, m, H-C4), 4.49-4.39 (1H, m, H-NH), 3.01-2.93 (2H, m, H-C1), 2.43 (3H, s, H-C10), 2.25-2.16 (2H, m, H-C2), 1.59-1.54 (3H, m, H-C5);  $\delta_{\text{C}}$  (75.5 MHz;  $\text{CDCl}_3$ ) 143.3 (C9), 136.8 (C6), 129.7 (C8), 127.7 (C3), 127.1 (C7), 125.5 (C4), 42.6 (C1), 27.0 (C2), 21.5 (C10), 12.9 (C5);  $m/z$  (CI) 240 ( $\text{MH}^+$ , 100), 184 (65), 172 (26); HRMS (ES) Found  $[\text{M}+\text{NH}_4]^+$  257.1315,  $\text{C}_{12}\text{H}_{17}\text{NO}_2\text{S}$  requires 257.1318.

**(E)-4-Methyl-N-(pent-3-enyl)benzenesulfonamide 22**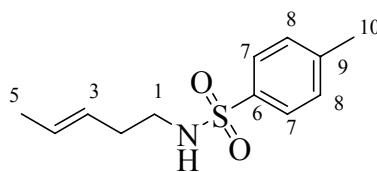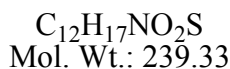

Following the general procedure X, (*E*)-pent-3-enyl 4-methylbenzenesulfonate (1.00 g, 4.16 mmol) was consumed based on analysis by TLC after 20 hours of stirring at 50 °C. The work-up afforded a yellow oil, which was purified by flash column chromatography (80% hexane, 20% ethyl acetate) to give the *title compound* (0.97g, 4.04 mmol, 97%) as a colourless oil.

$\nu_{\text{max}}(\text{neat})/\text{cm}^{-1}$  3284, 3035, 2918, 1816, 1598;  $\delta_{\text{H}}$  (300 MHz;  $\text{CDCl}_3$ ) 7.74 (2H, d,  $J$  8.4, H-C7), 7.31 (2H, d,  $J$  8.4, H-C8), 5.52-5.38 (1H, m, H-C3), 5.25-5.13 (1H, m, H-C4), 4.47-4.37 (1H, m, N-NH), 2.96 (2H, dd,  $J$  12.7, 6.4, H-C1), 2.43 (3H, s, H-C10), 2.15-2.07 (2H, m, H-C2), 1.64-1.60 (3H, m, H-C5);  $\delta_{\text{C}}$  (75.5 MHz;  $\text{CDCl}_3$ ) 143.3 (C9), 136.9 (C6), 129.6 (C8), 128.9 (C3), 127.1 (C7), 126.6 (C4), 42.5 (C1), 32.4 (C2), 21.4 (C10), 17.9 (C5);  $m/z$  (CI) 240 ( $\text{MH}^+$ , 100), 184 (35), 111 (18); HRMS (ES) Found  $[\text{M}+\text{H}]^+$  240.1050,  $\text{C}_{12}\text{H}_{17}\text{NO}_2\text{S}$  requires 240.1053.

**4-Methyl-N-(3-methylbut-3-enyl)benzenesulfonamide 24**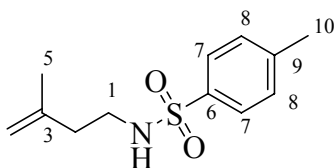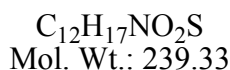

Following the general procedure X, 3-methylbut-3-enyl 4-methylbenzenesulfonate (12.63 g, 52.55 mmol) was consumed based on analysis by TLC after 20 hours of stirring at 50 °C. The work up afforded a yellow oil, which was purified by flash column chromatography (80% hexane, 20% ethyl acetate) to give the *title compound* (8.59 g, 35.89 mmol, 68%) as a white solid.

M.p. 38-39 °C;  $\delta_{\text{H}}$  (300 MHz;  $\text{CDCl}_3$ ) 7.70 (2H, d,  $J$  8.4, H-C7), 7.25 (2H, d,  $J$  8.4, H-C8), 4.89-4.78 (1H, m, N-NH), 4.73-4.69 (1H, m, H-C4), 4.59-4.56 (1H, m, H-C4), 2.98 (2H, dd,  $J$  12.9, 6.8, H-C1), 2.36 (3H, s, H-C10), 2.09 (2H, t,  $J$  6.8, H-C2), 1.53 (3H, s, H-C5);  $m/z$  (CI) 240 ( $\text{MH}^+$ , 62), 184 (100), 157 (18).

**4-Methyl-N-(4-methylpent-3-enyl)benzenesulfonamide 25**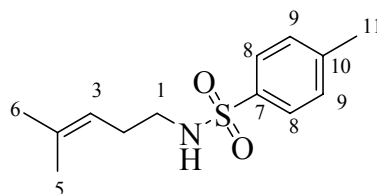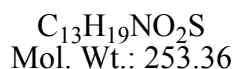

Following the general procedure X, 4-methylpent-3-enyl 4-methylbenzenesulfonate (630 mg, 2.48 mmol) was consumed based on analysis by TLC after 20 hours of stirring at 50 °C. The work up afforded a yellow oil, which was purified by flash column chromatography (80% hexane, 20% ethyl acetate) to give the *title compound* (317 mg, 1.25 mmol, 50%) as a colourless oil.

$\nu_{\text{max}}(\text{neat})/\text{cm}^{-1}$  3521, 3281, 2926, 1598;  $\delta_{\text{H}}$  (300 MHz;  $\text{CDCl}_3$ ) 7.74 (2H, d,  $J$  8.3, H-C8), 7.30 (2H, d,  $J$  8.3, H-C9), 4.95-4.87 (1H, m, H-C3), 4.48 (1H, t,  $J$  5.8, H-NH), 2.93 (2H, dd,  $J$  13.1, 6.6, H-C1), 2.42 (3H, s, H-C11), 2.19-2.09 (2H, m, H-C2), 1.66 (3H, s, H-C6), 1.55 (3H, s, H-C5);  $\delta_{\text{C}}$  (75.5 MHz;  $\text{CDCl}_3$ ) 143.3 (C10), 136.8 (C7), 135.6 (C3), 129.6 (C9), 127.1 (C8), 119.6 (C4), 42.9 (C1), 28.1 (C2), 25.7 (C6), 21.5 (C10), 17.8 (C5);  $m/z$  (CI) 254 ( $\text{MH}^+$ , 100), 184 (38), 155 (12); HRMS (ES) Found  $[\text{M}+\text{H}]^+$  254.1207,  $\text{C}_{13}\text{H}_{20}\text{NO}_2\text{S}$  requires 254.1209.

**(±)-tert-Butyl pent-4-en-2-yl(tosyl)carbamate 40**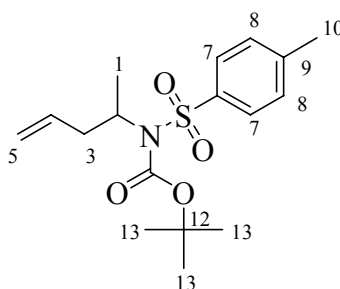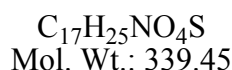

A round-bottomed flask was charged with (±)-pent-4-en-2-ol (1.00 g, 11.61 mmol, 1.00 eq.) and tetrahydrofuran (160 mL). The resulting solution was stirred at room temperature and triphenylphosphine (9.07 g, 34.83 mmol, 3.00 eq.) added portionwise followed by *tert*-butyl tosylcarbamate (4.72 g, 17.38 mmol, 1.50 eq.) portionwise and diisopropyl azodicarboxylate (5.67 mL, 28.62 mmol, 2.47 eq.) dropwise. The resulting solution was stirred overnight, filtered over a pad of celite and concentrated *in vacuo*. This afforded a pale yellow oil which was purified by flash column chromatography (90% hexane 10% ethyl acetate) to afford the *title compound* (2.72 g, 8.01 mmol, 69%) as a sticky colourless oil.

$\delta_{\text{H}}$  (300 MHz;  $\text{CDCl}_3$ ) 7.78 (2H, d,  $J$  8.4, H-C7), 7.28 (2H, d,  $J$  8.4, H-C8), 5.74 (1H, tdd,  $J$  17.2, 10.0, 7.2, H-C4), 5.13-5.00 (2H, m, H-C5), 4.69-4.56 (1H, m, H-C2), 2.78-2.66 (1H, m, H-C3), 2.52-2.42 (1H, m, H-C3), 2.43 (3H, s, H-C10), 1.46 (3H, d,  $J$  6.8, H-C1), 1.35 (9H, s, H-C13);  $\delta_{\text{C}}$  (75.5 MHz;  $\text{CDCl}_3$ ) 150.6

(C11), 143.7 (C9), 137.9 (C4), 135.2 (C6), 129.1 (C8), 127.8 (C7), 117.6 (C5), 83.9 (C12), 54.9 (C2), 39.4 (C3), 27.9 (C13), 21.6 (C10), 19.4 (C1);

**(±)-4-Methyl-N-(pent-4-en-2-yl)benzenesulfonamide 41**

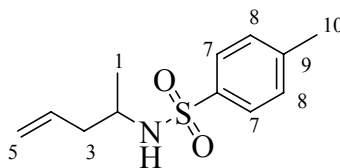

$C_{12}H_{17}NO_2S$   
Mol. Wt.: 239.33

A round-bottomed flask was charged with (±)-*tert*-butyl pent-4-en-2-yl(tosyl)carbamate (2.13 g, 6.27 mmol, 1.00 eq.) and dichloromethane (43 mL). The resulting solution was stirred at room temperature and trifluoroacetic acid (3.61 g, 31.66 mmol, 5.00 eq.) added dropwise. The mixture was stirred at room temperature overnight and water (50 mL) was added. The organic layer was separated and the aqueous layer was extracted with dichloromethane (3 x 30 mL). The combined organic layers were dried over magnesium sulfate, filtered, and concentrated *in vacuo*.

This afforded a pale yellow oil which was purified by flash column chromatography (80% hexane 20% ethyl acetate) to afford the *title compound* (1.50 g, 6.27 mmol, *quantitative*) as a colourless oil.

$\delta_H$  (300 MHz;  $CDCl_3$ ) 7.75 (2H, d, *J* 8.3, H-C7), 7.29 (2H, d, *J* 8.3, H-C8), 5.56 (1H, tdd, *J* 17.4, 10.3, 7.2, H-C4), 5.06-4.95 (2H, m, H-C5), 4.53 (1H, d, *J* 7.1, H-NH), 3.43-3.29 (1H, m, H-C2), 2.42 (3H, s, H-C10), 2.14-2.08 (2H, m, H-C3), 1.06 (3H, d, *J* 6.6, H-C1); *m/z* (CI) 240 ( $MH^+$ , 45), 198 (100), 155 (10).

**(±)-(E)-N-(Hex-4-en-2-yl)-4-methylbenzenesulfonamide 43**

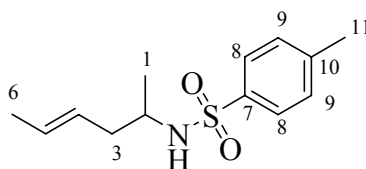

$C_{13}H_{19}NO_2S$   
Mol. Wt.: 253.36

Following the general procedure X, (±)-(E)-hex-4-en-2-yl 4-methylbenzenesulfonate (350 mg, 1.38 mmol) was consumed based on analysis by TLC after 20 hours of stirring at 50 °C. The work up afforded a yellow oil, which was purified by flash column chromatography (80% hexane, 20% ethyl acetate) to give the *title compound* (107 mg, 0.42 mmol, 31%) as a colourless oil.

$\delta_H$  (300 MHz;  $CDCl_3$ ) 7.66 (2H, d, *J* 8.3, H-C8), 7.22 (2H, d, *J* 8.3, H-C9), 5.36-5.23 (1H, m, H-C4), 5.08-4.95 (1H, m, H-C5), 4.66 (1H, d, *J* 7.2, H-NH), 3.24-3.11 (1H, m, H-C2), 2.33 (3H, s, H-C11), 1.96-1.89 (2H, m, H-C3), 1.50-1.46 (3H, m, H-C6), 0.97 (3H, d, *J* 6.6, H-C1); *m/z* (CI) 254 ( $MH^+$ , 100), 198 (70), 172 (22).

**General procedure for amination (tosyl displacement by primary amine)**

A round-bottomed flask equipped with a condenser was charged with primary amine (90 mmol, 5.00 eq.), tosylated alcohol (18 mmol, 1.00 eq.), and ethanol (18ml). The resulting solution was stirred at reflux temperature until TLC showed complete consumption of starting material. The solution was cooled to room temperature, the ethanol removed *in vacuo* and the excess of primary amine carefully distilled under reduced pressure unless otherwise stated. The resulting residue was partitioned between dichloromethane (60 mL) and 1.0 M aqueous sodium hydroxide solution (40mL). The organic layer was separated, the aqueous layer extracted with dichloromethane (3 x 10 mL), the combined organic layers dried over magnesium sulphate, filtered and concentrated *in vacuo*.

**N-Benzyl-N-(3-butenyl)amine 3**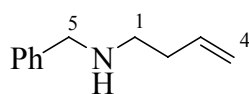

C<sub>11</sub>H<sub>15</sub>N  
Mol. Wt.: 161.24

Following the general procedure X, 4-(toluene-4-sulfonyloxy)-but-1-ene (4.07 g, 18.00 mmol), in the presence of benzylamine (9.65 g, 90.00 mmol), was consumed based on analysis by TLC after 20 hours of stirring and heating. The excess of benzylamine was distilled (104 °C, 245 mmHg) and the work up gave a yellow oil, which was purified by flash column chromatography (75% petroleum ether 24% ethyl acetate 1% triethylamine) to give the *title compound* (2.29 g, 14.00 mmol, 50%) as a colourless oil.

$\delta_{\text{H}}$  (300 MHz; CDCl<sub>3</sub>) 7.38-7.24 (5H, m, ArH) 5.88-5.74 (1H, m, H-C3), 5.15-5.03 (2H, m, H-C4), 3.82 (2H, s, H-C5), 2.73 (2H, t, *J* 6.0, H-C1), 2.31 (2H, dt, *J* 6.0, 6.0 H-C2), 1.66 (1H, bs, H-NH);  $\delta_{\text{C}}$  (75.5 MHz; CDCl<sub>3</sub>) 140.5 (ArC), 136.8 (C3), 128.9 (ArC), 128.5 (ArC), 127.2 (ArC), 116.9 (C4), 54.2 (C5), 48.6 (C1), 34.6 (C2).

**Benzyl-(3-methyl-but-3-enyl)-amine 13**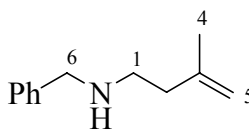

C<sub>12</sub>H<sub>17</sub>N  
Mol. Wt.: 175.27

Following the general procedure, 2-methyl-4-(toluene-4-sulfonyloxy)-but-1-ene (2.88 g, 12.00 mmol), in the presence of benzylamine (6.43 g, 60 mmol), was consumed based on analysis by TLC after 18 hours of stirring and heating. The work up gave a yellow oil, which was purified by flash column chromatography (75% petroleum ether 24% ethyl acetate 1% triethylamine) to give the *title compound* (2.55 g, 14.55 mmol, 97%) as a colourless oil.

$\delta_{\text{H}}$  (300 MHz; CDCl<sub>3</sub>) 7.37-7.23 (5H, m, ArH), 4.79 (1H, s, H-C5), 4.75 (1H, s, H-C5), 3.81 (2H, s, H-C6), 2.76 (2H, t, *J* 6.3, H-C1), 2.26 (2H, t, *J* 6.3, H-C2), 1.72 (3H, s, H-C4);  $\delta_{\text{C}}$  (75.5 MHz; CDCl<sub>3</sub>) 143.9 (C3),



140.5 (ArC), 128.8 (ArC), 128.6 (ArC), 127.4 (ArC), 112.0 (C5), 54.2 (C6), 47.1 (C1), 38.3 (C2), 22.6 (C4);  
*m/z* (CI) 176 (MH<sup>+</sup>, 100), 120 (93).

**General procedure for the iodine catalysed synthesis of homoallylic amines**

A round-bottom flask was charged with aldehyde (15.00 mmol, 1 eq.) and acetonitrile (15 ml). To the resulting solution at room temperature was added sequentially iodine (0.38 g, 1.5 mmol, 0.10 eq.), benzyl carbamate (2.38 g, 15.75 mmol, 1.05 eq.) portionwise, and dropwise allyl trimethyl silane (2.38 mL, 15 mmol, 1.00 eq.). The resulting suspension was stirred at room temperature until TLC showed complete consumption of starting material. To the solution was added sodium thiosulfate (0.90 g), distilled water (10 mL) and the reaction mixture stirred for a further 20 minutes. The biphasic solution was diluted with diethyl ether (30 mL), the organic layer washed with saturated aqueous sodium chloride (2 x 25 mL) and combined aqueous layers extracted with diethyl ether (2 x 25 mL). The combined organic layers were dried over sodium thiosulfate, filtered, and concentrated *in vacuo*.

***N*-Benzyloxycarbonyl-(±)-1-benzylbut-3-enylamine 6**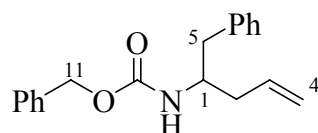

$C_{19}H_{21}NO_2$   
Mol. Wt.: 295.38

Following the general procedure, phenylacetaldehyde (1.80 g, 15.00 mmol), gave after overnight stirring a yellow oil which was purified by flash column chromatography (90% petroleum ether 10% ethyl acetate) to give the *title compound* (2.00 g, 6.76 mmol, 45%) as a colourless oil.

$\delta_H$  (300 MHz;  $CDCl_3$ ) 7.42-7.18 (10H, m, ArH), 5.88-5.74 (1H, m, H-C3), 5.14-5.07 (2H, m, H-C4), 5.08 (2H, s, H-C11), 4.67-4.64 (1H, m, H-NH), 4.04-3.97 (1H, m, H-C1), 2.89-2.76 (2H, m, H-C2), 2.35-2.28 (1H, m, H-C5), 2.20-2.07 (1H, m, H-C5);  $\delta_C$  (75.5 MHz;  $CDCl_3$ ) 156.2 (C10), 138.3 (ArC), 137.0 (C3), 134.6 (ArC), 129.8 (ArC), 129.0 (ArC), 128.7 (ArC), 128.5 (ArC), 128.4 (ArC), 126.9 (ArC), 118.7 (C4), 67.4 (C11), 52.1 (C5), 40.8 (C1), 38.6 (C2).

***N*-Benzyloxycarbonyl-(±)-1-heptylbut-3-enylamine 7**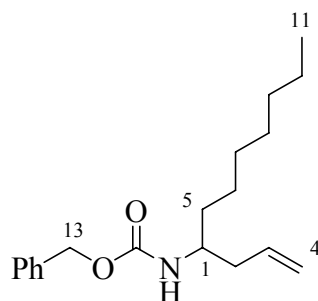

$C_{19}H_{29}NO_2$   
Mol. Wt.: 303.44

Following the general procedure, octanal (1.80 g, 15.00 mmol), gave after overnight stirring a yellow oil which was purified by flash column chromatography (90% petroleum ether 10% ethyl acetate) to give the *title compound* (1.53 g, 5.03 mmol, 34%) as a white solid.

M.p. 52-53°C (Lit.: 51-52°C);  $\delta_{\text{H}}$  (300 MHz;  $\text{CDCl}_3$ ) 7.38-7.34 (5H, m, ArH), 5.82-5.71 (1H, m, H-C3), 5.10-5.05 (2H, m, H-C4), 5.10 (2H, s, H-C13), 4.57-4.54 (1H, m, H-NH), 3.73-3.71 (1H, m, H-C1), 2.31-2.15 (2H, m, H-C2), 1.32-1.25 (12H, m, H-C5 to C10), 0.89 (3H, t,  $J$  6.0, H-C11);  $\delta_{\text{C}}$  (75.5 MHz;  $\text{CDCl}_3$ ) 156.5 (C12), 137.2 (ArC), 134.8 (C3), 128.9 (ArC), 128.4 (ArC), 118.16 (C4), 66.9 (C13), 51.1 (C5), 39.9 (C1), 35.0 (C2), 32.2 (C6), 29.8 (C7 and C8), 26.3 (C9), 23.1 (C10), 14.5 (C11);  $m/z$  (CI) 304 ( $\text{MH}^+$ , 100), 196 (28), 172 (18).

#### 4.5. General procedure for the aza-Prins reaction

A round-bottomed flask was charged with indium trichloride (642 mg, 2.96 mmol, 1.50 eq.) and dichloromethane (5 mL). To the resulting suspension was added an aldehyde (2.96 mmol, 1.50 eq.) in dichloromethane (1.5 mL). After stirring the mixture for 15 minutes at room temperature, a *N*-tosyl homoallylicamine derivative (1.97 mmol, 1.00 eq.) in dichloromethane (1.5 mL) was added and the resulting mixture stirred until TLC showed complete consumption of starting material. The mixture was diluted with dichloromethane (10 mL) and water (10 mL) and stirred for 30 minutes. The organic layer was separated and the aqueous layer was extracted with dichloromethane (3 x 10 mL). The combined organic layers were dried over magnesium sulfate, filtered and concentrated *in vacuo* and purified by chromatography.

##### 4.5.1 (2*R*,3*R*,4*S*)-4-Chloro-2-heptyl-3-methyl-1-tosylpiperidine/(2*S*,3*S*,4*R*)-4-Chloro-2-heptyl-3-methyl-1-tosylpiperidine (26a) and (2*S*,3*R*)-3-((*S*)-1-Chloroethyl)-2-heptyl-1-tosylpyrrolidine/(2*R*,3*S*)-3-((*R*)-1-Chloroethyl)-2-heptyl-1-tosylpyrrolidine (27a)

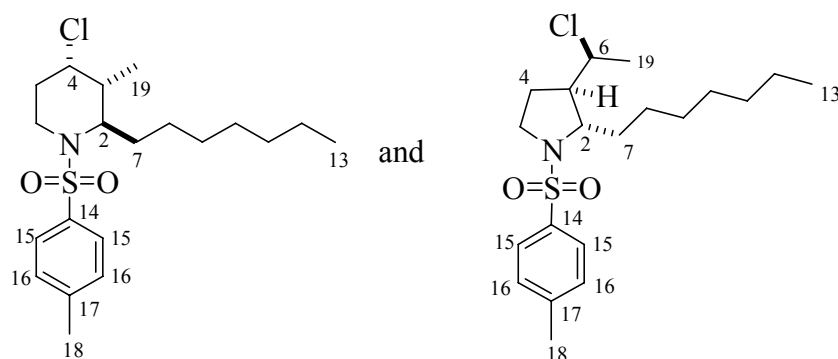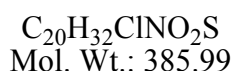

Following the general procedure for the aza-Prins reaction, (*Z*)-4-methyl-*N*-(pent-3-enyl)benzenesulfonamide (150 mg, 0.62 mmol), and octanal (120 mg, 0.94 mmol), were consumed based on analysis by TLC after 17 hours of stirring at room temperature. The work up afforded a yellow oil, which was purified by flash column chromatography (90% hexane, 10% ethyl acetate) to give the two *title compounds*.

##### (2*R*,3*R*,4*S*)-4-Chloro-2-heptyl-3-methyl-1-tosylpiperidine/(2*S*,3*S*,4*R*)-4-Chloro-2-heptyl-3-methyl-1-tosylpiperidine (26a)

84 mg (0.22 mmol, 35%) as a colourless oil.  $\nu_{\text{max}}(\text{neat})/\text{cm}^{-1}$  2928, 1729, 1598;  $\delta_{\text{H}}$  (300 MHz,  $\text{CDCl}_3$ ) 7.67 (2H, d,  $J$  8.2, H-C15), 7.27 (2H, d,  $J$  8.2, H-C16), 4.31 (1H, td,  $J$  12.6, 4.6, H-C4), 3.96-3.88 (1H, m, H-C2), 3.78-3.69 (1H, m, H-C6), 2.94 (1H, td,  $J$  13.6, 3.2, H-C6), 2.41 (3H, s, H-C18) 2.16-2.05 (1H, m, H-C3), 2.01-1.84 (1H, m, H-C5), 1.84-1.74 (1H, m, H-C5), 1.66-1.33 (2H, m, H-C7), 1.32-1.11 (10H, m, H-C8 to H-C12), 1.08 (3H, d,  $J$  6.9, H-C19), 0.87 (3H, t,  $J$  6.8, H-C13);  $\delta_{\text{C}}$  (75.5 MHz;  $\text{CDCl}_3$ ) 143.1 (C17), 138.1 (C14), 129.5 (C16), 126.9 (C15), 60.1 (C2), 57.4 (C4), 40.6 (C6), 37.3 (C3), 31.7 (C11), 30.0 (C5),

29.4 (C9 and C10), 26.8 (C12), 22.6 (C8), 21.5 (C18), 14.1 (C13), 12.7 (C19);  $m/z$  (CI) 386 (MH<sup>+</sup>, 100), 350 (60), 286 (42); HRMS (ES) Found [M+H]<sup>+</sup> 386.1910, C<sub>20</sub>H<sub>33</sub>ClNO<sub>2</sub>S requires 386.1915.

exp201.1fr24-36(10%etoacinhex)

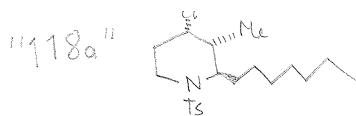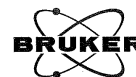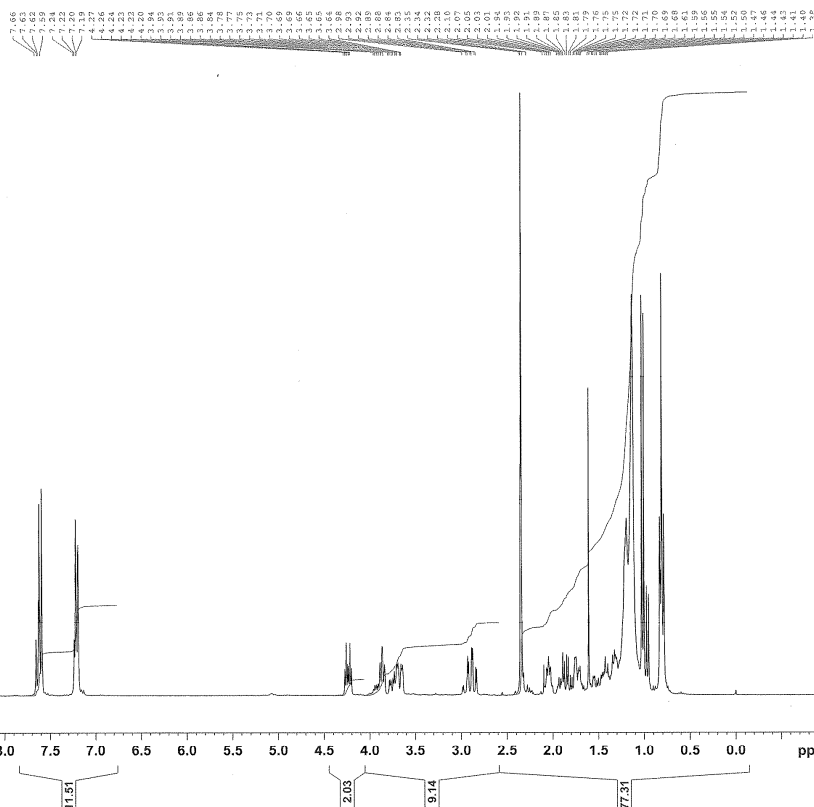

Current Data Parameters  
 NAME exp201.1fr24-36  
 EXPNO 10  
 PROCNO 1

F2 - Acquisition Parameters  
 Date\_ 20061011  
 Time 16.05  
 INSTRUM spect  
 PROBRD 5 mm QNP 1H/13  
 PULPROG zg30  
 TD 65536  
 SOLVENT CDCl3  
 NS 16  
 DS 2  
 SWH 6172.839 Hz  
 FIDRES 0.094190 Hz  
 AQ 5.3084660 sec  
 RG 101.6  
 DW 81.000 usec  
 DE 6.00 usec  
 TE 292.4 K  
 D1 1.00000000 sec  
 MCREST 0.00000000 sec  
 MCNRK 0.01500000 sec

\*\*\*\*\* CHANNEL f1 \*\*\*\*\*  
 NUC1 1H  
 P1 9.00 usec  
 PL1 0.00 dB  
 SF01 300.1318534 MHz

F2 - Processing parameters  
 SI 32768  
 SF 300.1300252 MHz  
 WDN HM  
 SSB 0  
 LB 0.30 Hz  
 GB 0  
 PC 1.00

exp201.1fr24-36(10%etoacinhex)

"178a"

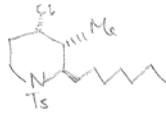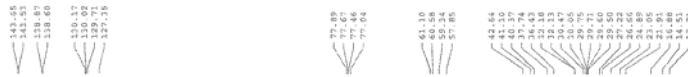

Current Data Parameters  
 NAME exp201.1fr24-36  
 EXPNO 11  
 PROCNO 1

F2 - Acquisition Parameters  
 Date\_ 20061011  
 Time 21.40  
 INSTRUM spect  
 PROBHD 5 mm QNP 1H/13  
 PULPROG zgpg30  
 TD 65536  
 SOLVENT CDCl3  
 NS 1024  
 DS 4  
 SWH 17985.611 Hz  
 FIDRES 0.274439 Hz  
 AQ 1.8219508 sec  
 RG 1290.2  
 DW 27.800 usec  
 DE 6.00 usec  
 TE 292.7 K  
 D1 2.0000000 sec  
 d11 0.0300000 sec  
 DELTA 1.89999998 sec  
 MCREST 0.0000000 sec  
 MCWRK 0.0150000 sec

----- CHANNEL f1 -----  
 NUC1 13C  
 P1 8.00 usec  
 PL1 0.00 dB  
 SFO1 75.4752953 MHz

----- CHANNEL f2 -----  
 CPDPRG2 waltz16  
 NUC2 1H  
 PCPD2 100.00 usec  
 PL2 0.00 dB  
 PL12 23.00 dB  
 PL13 24.00 dB  
 SFO2 300.1312005 MHz

F2 - Processing parameters  
 SI 32768  
 SF 75.4677190 MHz  
 MDW EM  
 SSB 0  
 LB 1.00 Hz  
 GB 0  
 PC 1.40

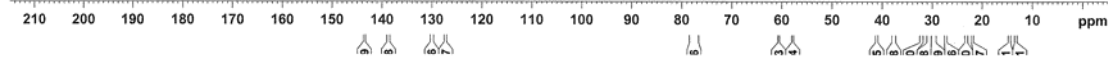

exp201.1fr24-36(10%etoacinhex)

"178a"

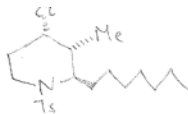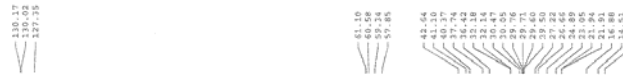

Current Data Parameters  
 NAME exp201.1fr24-36  
 EXPNO 12  
 PROCNO 1

F2 - Acquisition Parameters  
 Date\_ 20061011  
 Time 21.50  
 INSTRUM spect  
 PROBHD 5 mm QNP 1H/13  
 PULPROG dept135  
 TD 65536  
 SOLVENT CDCl3  
 NS 256  
 DS 4  
 SWH 17985.611 Hz  
 FIDRES 0.274439 Hz  
 AQ 1.8219508 sec  
 RG 16384  
 DW 27.800 usec  
 DE 6.00 usec  
 TE 292.6 K  
 CNST2 145.0000000  
 D1 2.0000000 sec  
 d2 0.00344828 sec  
 d12 0.00002000 sec  
 DELTA 0.00001019 sec  
 MCREST 0.0000000 sec  
 MCWRK 0.0150000 sec

----- CHANNEL f1 -----  
 NUC1 13C  
 P1 8.00 usec  
 PL1 0.00 dB  
 SFO1 75.4752953 MHz

----- CHANNEL f2 -----  
 CPDPRG2 waltz16  
 NUC2 1H  
 P3 8.00 usec  
 P4 16.00 usec  
 PCPD2 100.00 usec  
 PL2 0.00 dB  
 PL12 23.00 dB  
 SFO2 300.1312005 MHz

F2 - Processing parameters  
 SI 32768  
 SF 75.4677190 MHz  
 MDW EM  
 SSB 0  
 LB 1.00 Hz  
 GB 0  
 PC 1.40

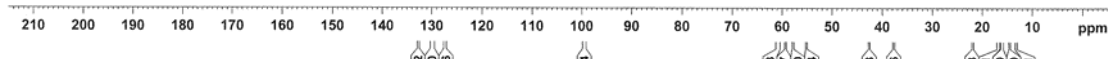

**(2*S*,3*R*)-3-((*S*)-1-Chloroethyl)-2-heptyl-1-tosylpyrrolidine/(2*R*,3*S*)-3-((*R*)-1-Chloroethyl)-2-heptyl-1-tosylpyrrolidine (27a)**

Further elution (90% hexane 10% ethyl acetate) provided the other *title compound* (84 mg, 0.22 mmol, 35%) as a colourless oil.  $\nu_{\max}(\text{neat})/\text{cm}^{-1}$  2927, 1598;  $\delta_{\text{H}}$  (300 MHz;  $\text{CDCl}_3$ ) 7.75 (2H, d,  $J$  8.3, H-C15), 7.32 (2H, d,  $J$  8.3, H-C16), 3.80 (1H, ddd,  $J$  7.6, 4.9, 2.9, H-C2), 3.36 (1H, ddd,  $J$  10.7, 7.3, 5.7, H-C5), 3.25 (1H, td,  $J$  10.7, 7.3, H-C5), 3.09 (1H, qd,  $J$  8.8, 6.5, H-C6), 2.43 (3H, s, H-C18), 2.13-2.01 (1H, m, H-C3), 1.93 (1H, dt,  $J$  14.6, 7.3, H-C4), 1.79-1.66 (1H, m, H-C7), 1.66-1.51 (1H, m, H-C7), 1.48-1.31 (1H, m, H-C4), 1.27 (3H, d,  $J$  6.5, H-C19), 1.33-1.19 (10H, m, H-C8 to H-C12), 0.88 (3H, t,  $J$  6.6, H-C13);  $\delta_{\text{C}}$  (75.5 MHz;  $\text{CDCl}_3$ ) 143.4 (C17), 135.0 (C14), 129.6 (C16), 127.5 (C15), 63.7 (C1), 59.2 (C6), 52.5 (C3), 47.3 (C5), 37.0 (C7), 31.8 (C11), 29.4 (C9 and C10), 27.8 (C4), 25.8 (C8), 23.1 (C19), 22.6 (C12), 21.5 (C18), 14.1 (C13);  $m/z$  (CI) 386 ( $\text{MH}^+$ , 100), 350 (25), 286 (27); HRMS (ES) Found  $[\text{M}+\text{NH}_4]^+$  403.2185,  $\text{C}_{20}\text{H}_{36}\text{ClN}_2\text{O}_2\text{S}$  requires 403.2181.

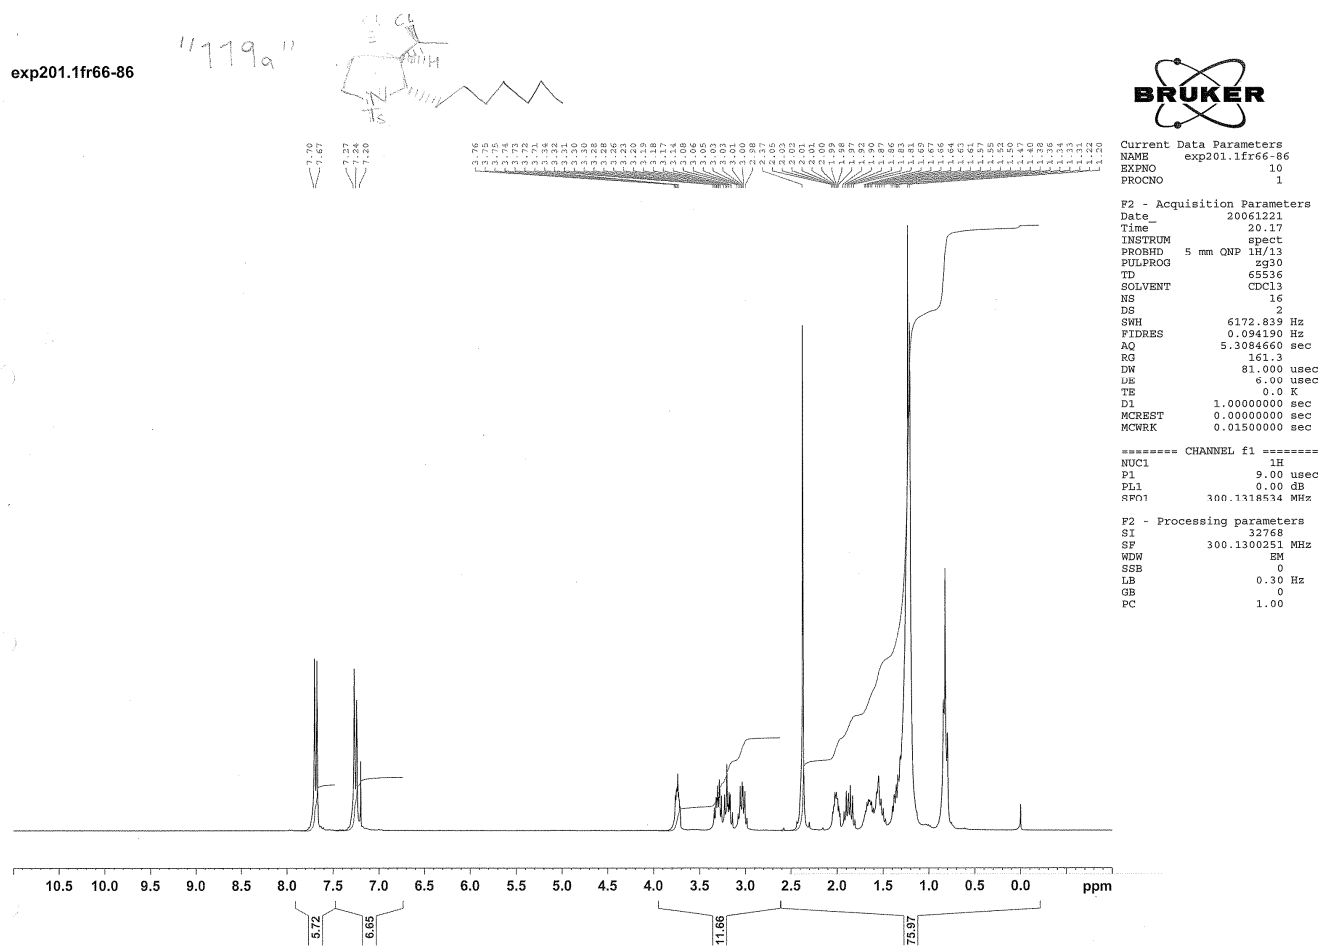

exp201.1fr66-86

"179a"

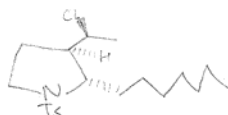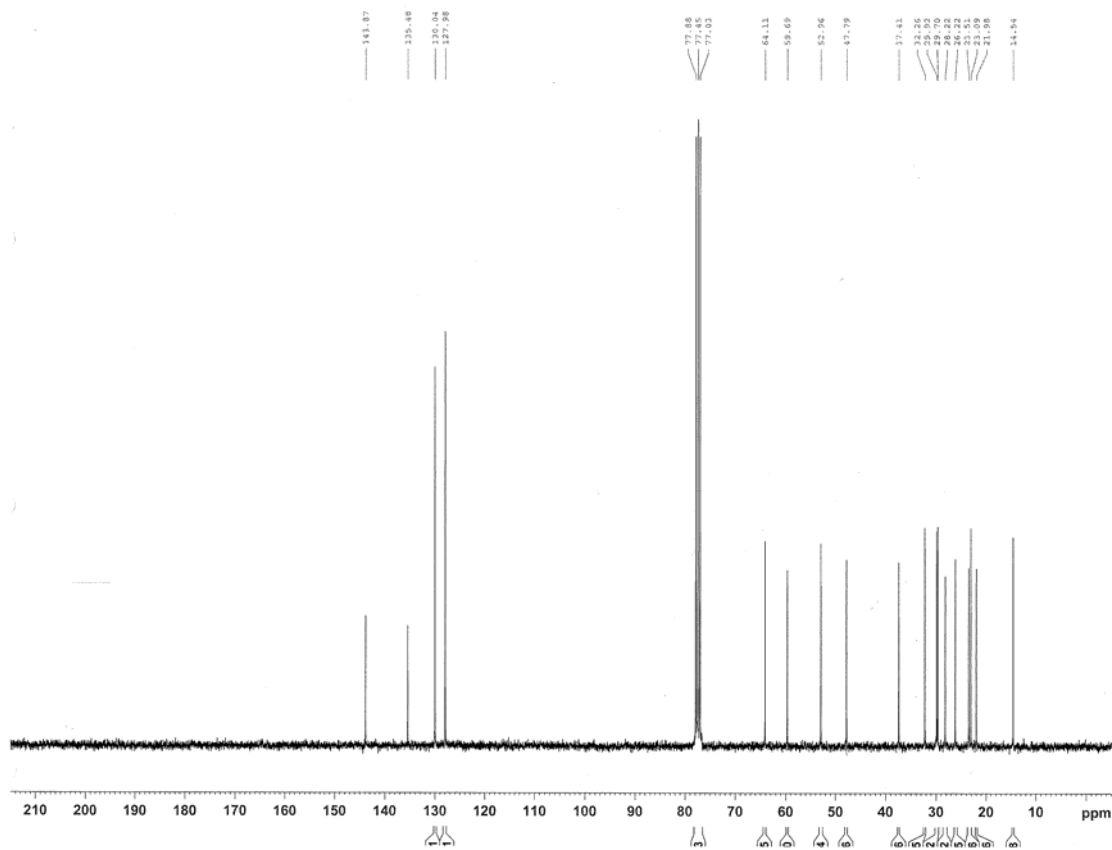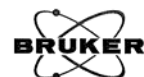

Current Data Parameters  
 NAME exp201.1fr66-86  
 EXPNO 1  
 PROCNO 1

F2 - Acquisition Parameters  
 Date\_ 20061221  
 Time 21.25  
 INSTRUM spect  
 PROBRD 5 mm QNP 1H/13  
 PULPROG zgpg30  
 TD 65536  
 SOLVENT CDCl3  
 NS 1024  
 DS 4  
 SWH 17985.611 Hz  
 FIDRES 0.274439 Hz  
 AQ 1.8219506 sec  
 RG 724.1  
 DW 27.800 usec  
 DE 6.00 usec  
 TE 0.0 K  
 D1 2.0000000 sec  
 d11 0.0300000 sec  
 DELTA 1.8999998 sec  
 MCREST 0.0000000 sec  
 MCWRK 0.0150000 sec

----- CHANNEL f1 -----  
 NUC1 13C  
 P1 8.00 usec  
 PL1 0.00 dB  
 SFO1 75.4752953 MHz

----- CHANNEL f2 -----  
 CPDPRG2 waltz16  
 NUC2 1H  
 PCPD2 100.00 usec  
 PL2 0.00 dB  
 PL12 23.00 dB  
 PL13 24.00 dB  
 SFO2 300.1312005 MHz

F2 - Processing parameters  
 SI 32768  
 SF 75.4677190 MHz  
 WDW EM  
 SSB 0  
 LB 1.00 Hz  
 GB 0  
 PC 1.40

exp201.1fr66-86

"179a"

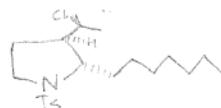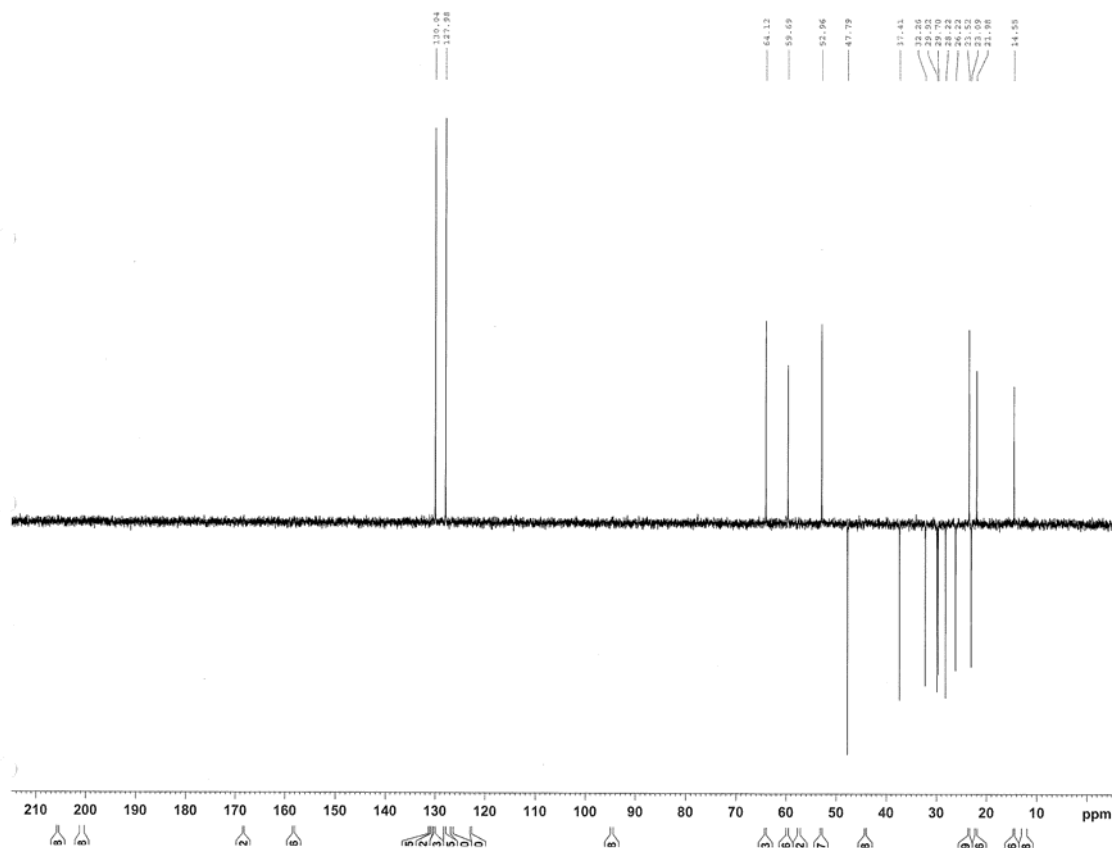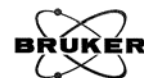

Current Data Parameters  
 NAME exp201.1fr66-86  
 EXPNO 12  
 PROCNO 1

F2 - Acquisition Parameters  
 Date\_ 20061221  
 Time 21.42  
 INSTRUM spect  
 PROBRD 5 mm QNP 1H/13  
 PULPROG dept135  
 TD 65536  
 SOLVENT CDCl3  
 NS 256  
 DS 4  
 SWH 17985.611 Hz  
 FIDRES 0.274439 Hz  
 AQ 1.8219508 sec  
 RG 16384  
 DW 27.800 usec  
 DE 6.00 usec  
 TE 0.0 K  
 CNST2 145.0000000  
 D1 2.0000000 sec  
 d2 0.00344828 sec  
 d12 0.0002000 sec  
 DELTA 0.0001019 sec  
 MCREST 0.0000000 sec  
 MCWRK 0.0150000 sec

----- CHANNEL f1 -----  
 NUC1 13C  
 P1 8.00 usec  
 P2 16.00 usec  
 PL1 0.00 dB  
 SFO1 75.4752953 MHz

----- CHANNEL f2 -----  
 CPDPRG2 waltz16  
 NUC2 1H  
 P3 8.00 usec  
 P4 16.00 usec  
 PCPD2 100.00 usec  
 PL2 0.00 dB  
 PL12 23.00 dB  
 SFO2 300.1312005 MHz

F2 - Processing parameters  
 SI 32768  
 SF 75.4677190 MHz  
 WDW EM  
 SSB 0  
 LB 1.00 Hz  
 GB 0  
 PC 1.40



**(2*S*,3*R*,4*S*)-4-Chloro-3-methyl-2-phenyl-1-tosylpiperidine/(2*R*,3*S*,4*R*)-4-Chloro-3-methyl-2-phenyl-1-tosylpiperidine (26b)**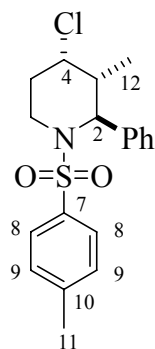

C<sub>19</sub>H<sub>22</sub>ClNO<sub>2</sub>S  
Mol. Wt.: 363.9

Following the general procedure, (*Z*)-4-methyl-*N*-(pent-3-enyl)benzenesulfonamide (150 mg, 0.62 mmol) in the presence of benzaldehyde (99 mg, 0.94 mmol), was consumed based on analysis by TLC after 144 hours of stirring at room temperature. The work up afforded a yellow oil, which was purified by flash column chromatography (90% hexane, 10% ethyl acetate) to give the *title compound* (34 mg, 0.09 mmol, 15%) as a white solid. M.p. 112-114 °C;  $\nu_{\max}(\text{neat})/\text{cm}^{-1}$  3029, 2940, 2344, 1596;  $\delta_{\text{H}}$  (300 MHz; CDCl<sub>3</sub>) 7.70 (2H, d, *J* 7.8, H-C8), 7.45-7.27 (5H, m, Ar-H), 7.21 (2H, d, *J* 7.8, H-C9), 5.19 (1H, s, H-C2), 4.09 (1H, td, *J* 11.8, 4.1, H-C4), 3.97-3.80 (1H, m, H-C6), 3.27 (1H, ddd, *J* 13.9, 11.8, 3.5, H-C6), 2.88-2.72 (1H, m, H-C3), 2.47 (3H, s, H-C11), 2.07-1.91 (1H, m, H-C5) 1.85-1.78 (1H, m, H-C5), 1.16 (3H, d, *J* 6.9, H-C12);  $\delta_{\text{C}}$  (75.5 MHz; CDCl<sub>3</sub>) 143.8 (C10), 137.8 (C7), 137.7 (ArC), 129.6 (ArC), 128.7 (ArC), 127.2 (ArC), 127.1 (C8), 126.8 (C9), 62.5 (C2), 57.5 (C4), 41.8 (C6), 39.3 (C3), 29.8 (C5), 21.5 (C11), 13.0 (C12); *m/z* (CI) 364 (MH<sup>+</sup>, 64), 328 (30), 210 (55); HRMS (ES) Found [M+H]<sup>+</sup> 364.1135, C<sub>19</sub>H<sub>23</sub>ClNO<sub>2</sub>S requires 364.1133.

exp201.2fr46-58(high vac)

"178b"

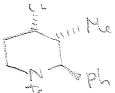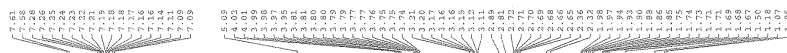

Current Data Parameters  
 NAME exp201.2fr46-58  
 EXPNO 20  
 PROCNO 1

F2 - Acquisition Parameters  
 Date\_ 20061013  
 Time 15.19  
 INSTRUM spect  
 PROBHD 5 mm QNP 1H/13  
 PULPROG zgpg30  
 TD 65536  
 SOLVENT CDCl3  
 NS 16  
 DS 2  
 SWH 6172.839 Hz  
 FIDRES 0.094190 Hz  
 AQ 5.3084660 sec  
 RG 456.1  
 DW 81.000 usec  
 DE 6.00 usec  
 TE 292.2 K  
 D1 1.0000000 sec  
 MCREST 0.0000000 sec  
 MCWRK 0.01500000 sec

----- CHANNEL f1 -----  
 NUC1 1H  
 P1 9.00 usec  
 PL1 0.00 dB  
 SFO1 300.1318534 MHz

F2 - Processing parameters  
 SI 32768  
 SF 300.1300278 MHz  
 WDN EM  
 SSB 0  
 LB 0.30 Hz  
 GB 0  
 PC 1.00

10.5 10.0 9.5 9.0 8.5 8.0 7.5 7.0 6.5 6.0 5.5 5.0 4.5 4.0 3.5 3.0 2.5 2.0 1.5 1.0 0.5 0.0 ppm

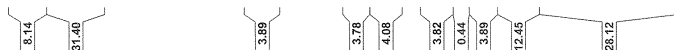

exp201.2fr46-58

"178b"

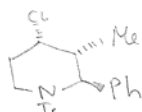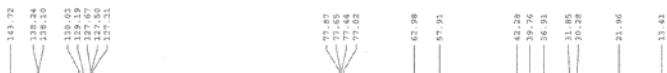

Current Data Parameters  
 NAME exp201.2fr46-58  
 EXPNO 11  
 PROCNO 1

F2 - Acquisition Parameters  
 Date\_ 20061013  
 Time 19.31  
 INSTRUM spect  
 PROBHD 5 mm QNP 1H/13  
 PULPROG zgpg30  
 TD 65536  
 SOLVENT CDCl3  
 NS 4  
 DS 4  
 SWH 17985.611 Hz  
 FIDRES 0.274439 Hz  
 AQ 1.8219508 sec  
 RG 2048  
 DW 27.800 usec  
 DE 6.00 usec  
 TE 292.2 K  
 D1 2.0000000 sec  
 d11 0.0300000 sec  
 DELTA 1.8999999 sec  
 MCREST 0.0000000 sec  
 MCNRK 0.01500000 sec

----- CHANNEL f1 -----  
 NUC1 13C  
 P1 8.00 usec  
 PL1 0.00 dB  
 SFO1 75.4752953 MHz

----- CHANNEL f2 -----  
 CPDPRG2 waltz16  
 NUC2 1H  
 PCPD2 100.00 usec  
 PL2 0.00 dB  
 PL12 23.00 dB  
 PL13 24.00 dB  
 SFO2 300.1312005 MHz

F2 - Processing parameters  
 SI 32768  
 SF 75.4677190 MHz  
 WDN EM  
 SSB 0  
 LB 1.00 Hz  
 GB 0  
 PC 1.40

210 200 190 180 170 160 150 140 130 120 110 100 90 80 70 60 50 40 30 20 10 ppm

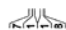

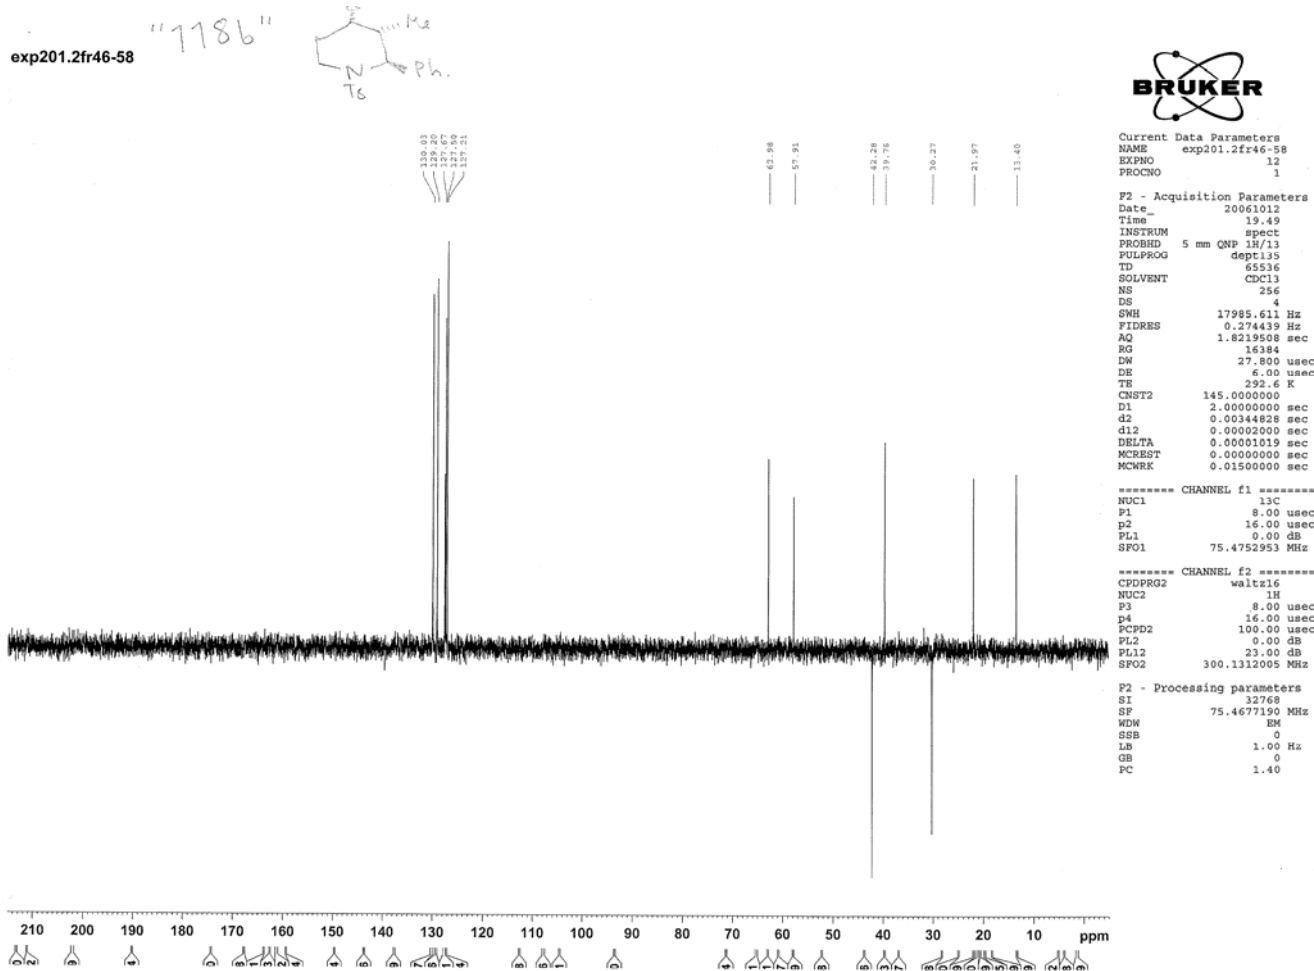

(2R,3R,4S)-4-Chloro-3-methyl-2-phenethyl-1-tosylpiperidine, (2S,3S,4R)-4-Chloro-3-methyl-2-phenethyl-1-tosylpiperidine (26c), (2S,3R)-3-((S)-1-Chloroethyl)-2-phenethyl-1-tosylpyrrolidine and (2R,3S)-3-((R)-1-Chloroethyl)-2-phenethyl-1-tosylpyrrolidine (27c)

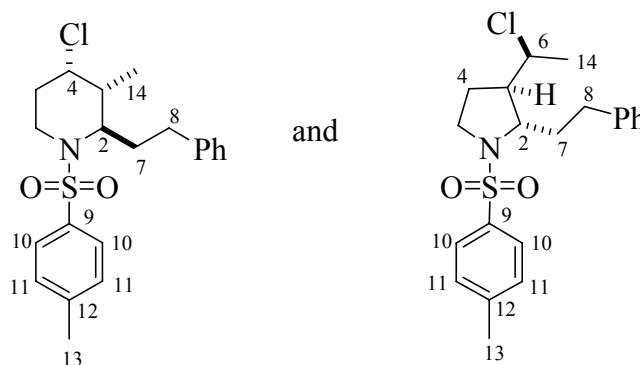

$C_{21}H_{26}ClNO_2S$   
 Mol. Wt.: 391.95

Following the general procedure, (Z)-4-methyl-N-(pent-3-enyl)benzenesulfonamide (150 mg, 0.62 mmol) in the presence of 3-phenylpropanal (126 mg, 0.94 mmol), was consumed based on analysis by TLC after 17 hours of stirring at room temperature. The work up afforded a yellow oil, which was purified by flash column chromatography (90% hexane, 10% ethyl acetate) to give the two *title compounds*

**(2*R*,3*R*,4*S*)-4-Chloro-3-methyl-2-phenethyl-1-tosylpiperidine/(2*S*,3*S*,4*R*)-4-Chloro-3-methyl-2-phenethyl-1-tosylpiperidine (26c)**

(98 mg, 0.25 mmol, 40%) as a colourless oil.

$\nu_{\max}(\text{neat})/\text{cm}^{-1}$  3063, 2938, 1598;  $\delta_{\text{H}}$  (300 MHz;  $\text{CDCl}_3$ ) 7.66 (2H, d,  $J$  8.3, H-C10), 7.34-7.13 (5H, m, Ar-H), 7.08 (2H, d,  $J$  8.3, H-C11), 4.32 (1H, td,  $J$  12.3, 4.6, H-C4), 4.01 (1H, m, H-C2), 3.80 (1H, dd,  $J$  13.3, 4.5, H-C6), 2.99 (1H, dt,  $J$  13.3, 3.3, H-C6), 2.66-2.47 (2H, m, H-C8), 2.42 (3H, s, H-C13), 2.22-2.13 (1H, m, H-C3), 2.02-1.88 (1H, m, H-C5), 1.89-1.77 (1H, m, H-C5), 1.78-1.52 (2H, m, H-C7), 1.07 (3H, d,  $J$  6.9, H-C14);  $\delta_{\text{C}}$  (75.5 MHz;  $\text{CDCl}_3$ ) 143.2 (C12), 140.9 (ArC), 138.0 (C9), 129.7 (C11), 128.5 (ArC), 128.2 (ArC), 126.9 (C10), 126.1 (ArC), 59.6 (C2), 57.2 (C4), 40.7 (C6), 37.4 (C3), 33.1 (C8), 31.8 (C5 or C7), 30.0 (C5 or C7), 21.5 (C13), 12.7 (C14);  $m/z$  (CI) 392 ( $\text{MH}^+$ , 100), 356 (18), 238 (48); HRMS (ES) Found  $[\text{M}+\text{NH}_4]^+$  409.1716,  $\text{C}_{21}\text{H}_{30}\text{ClN}_2\text{O}_2\text{S}$  requires 409.1711.

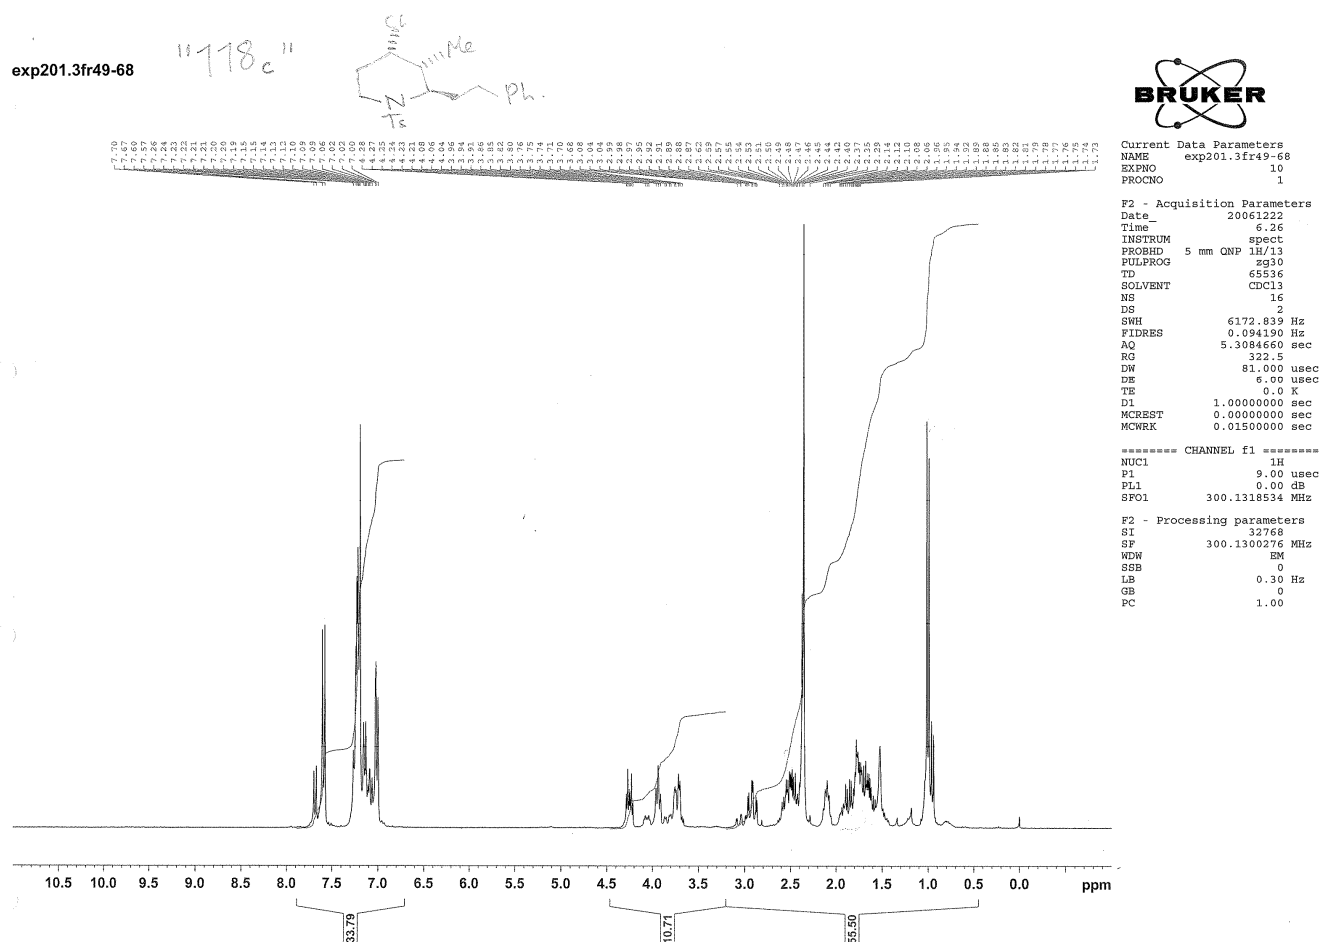

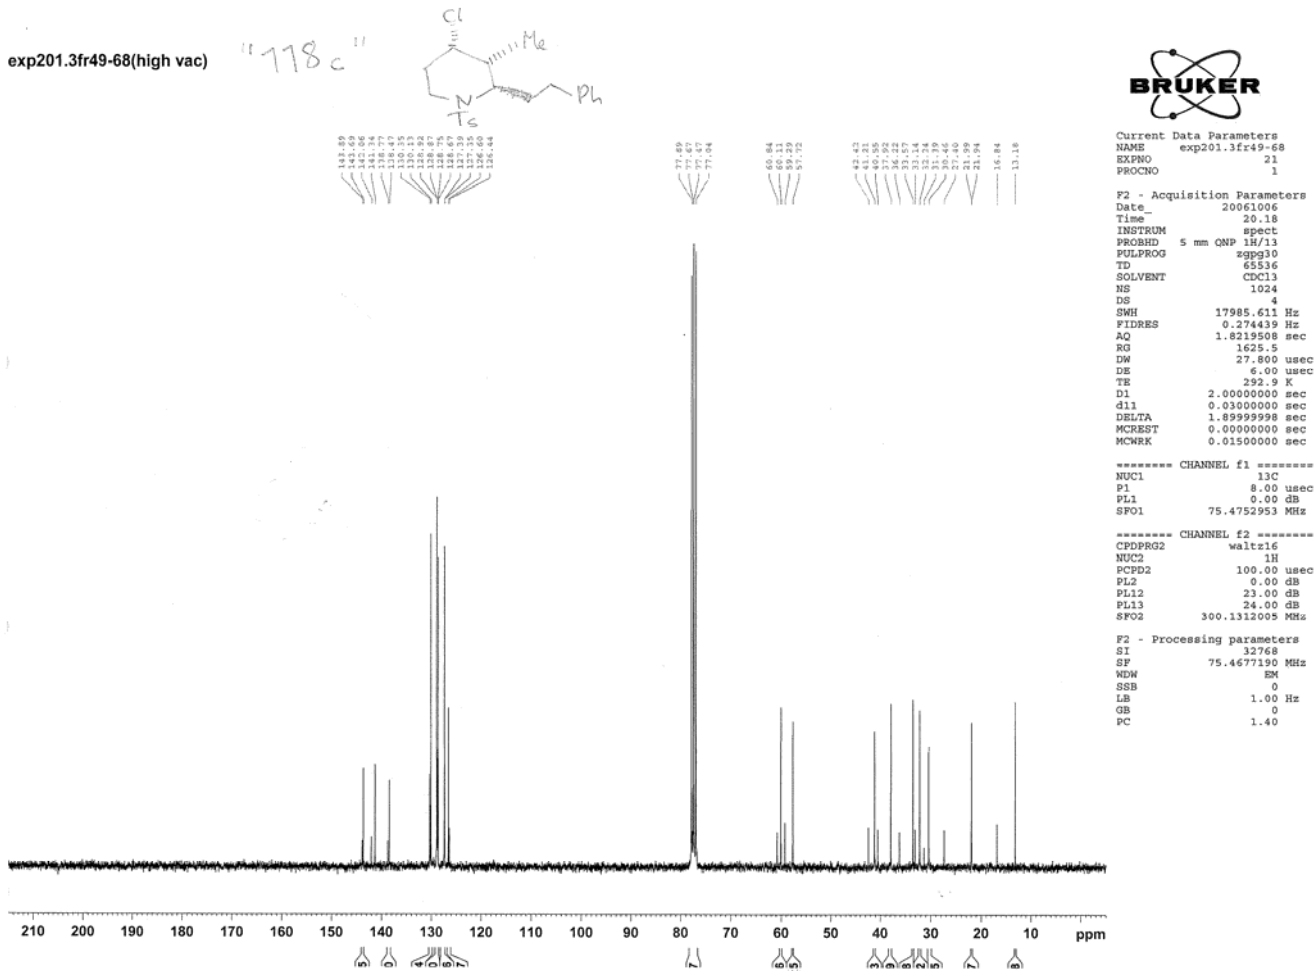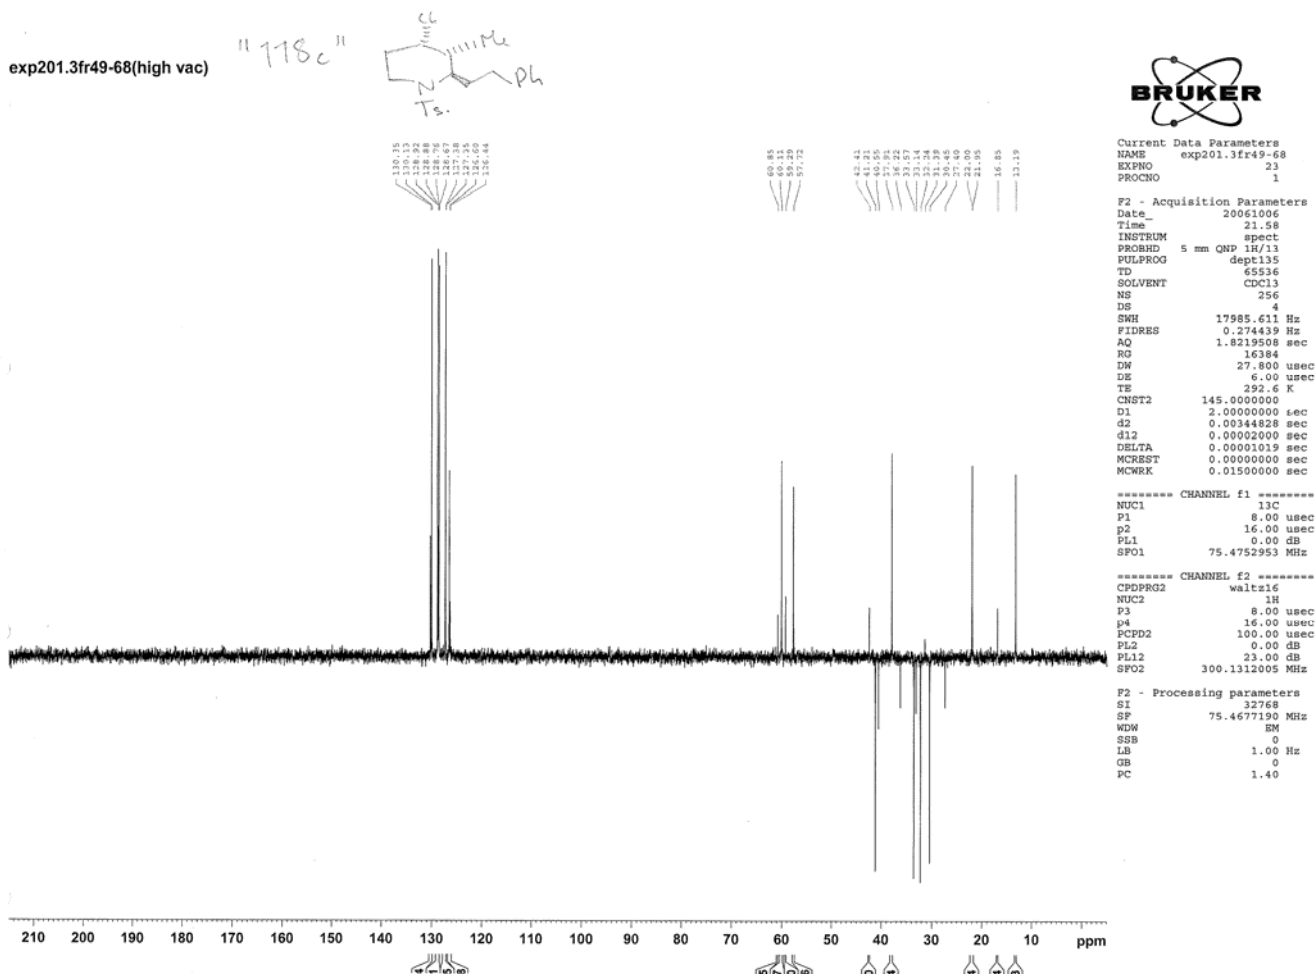

**(2*S*,3*R*)-3-((*S*)-1-Chloroethyl)-2-phenethyl-1-tosylpyrrolidine/(2*R*,3*S*)-3-((*R*)-1-Chloroethyl)-2-phenethyl-1-tosylpyrrolidine (27c)**

Further elution (90% hexane 10% ethyl acetate) provided the other *title compound* (88 mg, 0.22 mmol, 36%) as a white solid. M.p. 122-123 °C;  $\nu_{\max}(\text{KBr})/\text{cm}^{-1}$  3062, 2955, 1664, 1594;  $\delta_{\text{H}}$  (300 MHz;  $\text{CDCl}_3$ ) 7.81 (2H, d,  $J$  8.3, H-C10), 7.39 (2H, d,  $J$  8.3, H-C11), 7.36-7.24 (5H, m, Ar-H), 3.94 (1H, dt,  $J$  6.7, 3.2, H-C2), 3.55-3.31 (2H, m, H-C5), 3.18 (1H, qd,  $J$  9.1, 6.6, H-C6), 2.82 (2H, t,  $J$  8.3, H-C8), 2.50 (3H, s, H-C13), 2.25-2.17 (1H, m, H-C3), 2.18-2.08 (2H, m, H-C7), 2.19-1.95 (1H, m, H-C4), 1.45 (1H, dt,  $J$  13.0, 6.2, H-C4), 1.34 (3H, d,  $J$  6.6, H-C14);  $\delta_{\text{C}}$  (75.5 MHz;  $\text{CDCl}_3$ ) 143.6 (C12), 141.6 (ArC), 134.8 (C9), 129.6 (C11), 128.4 (ArC), 128.3 (ArC), 127.5 (C10), 125.7 (ArC), 63.4 (C2), 59.2 (C6), 52.9 (C3), 47.6 (C5), 38.6 (C7), 32.1 (C8), 27.9 (C4), 23.1 (C14), 21.5 (C13);  $m/z$  (CI) 392 ( $\text{MH}^+$ , 100), 356 (12), 238 (58); Anal. Calcd. for  $\text{C}_{21}\text{H}_{26}\text{ClNO}_2\text{S}$  requires C, 64.35; H, 6.69; N, 3.57%. Found: C, 64.47; H, 6.58; N, 3.54%.

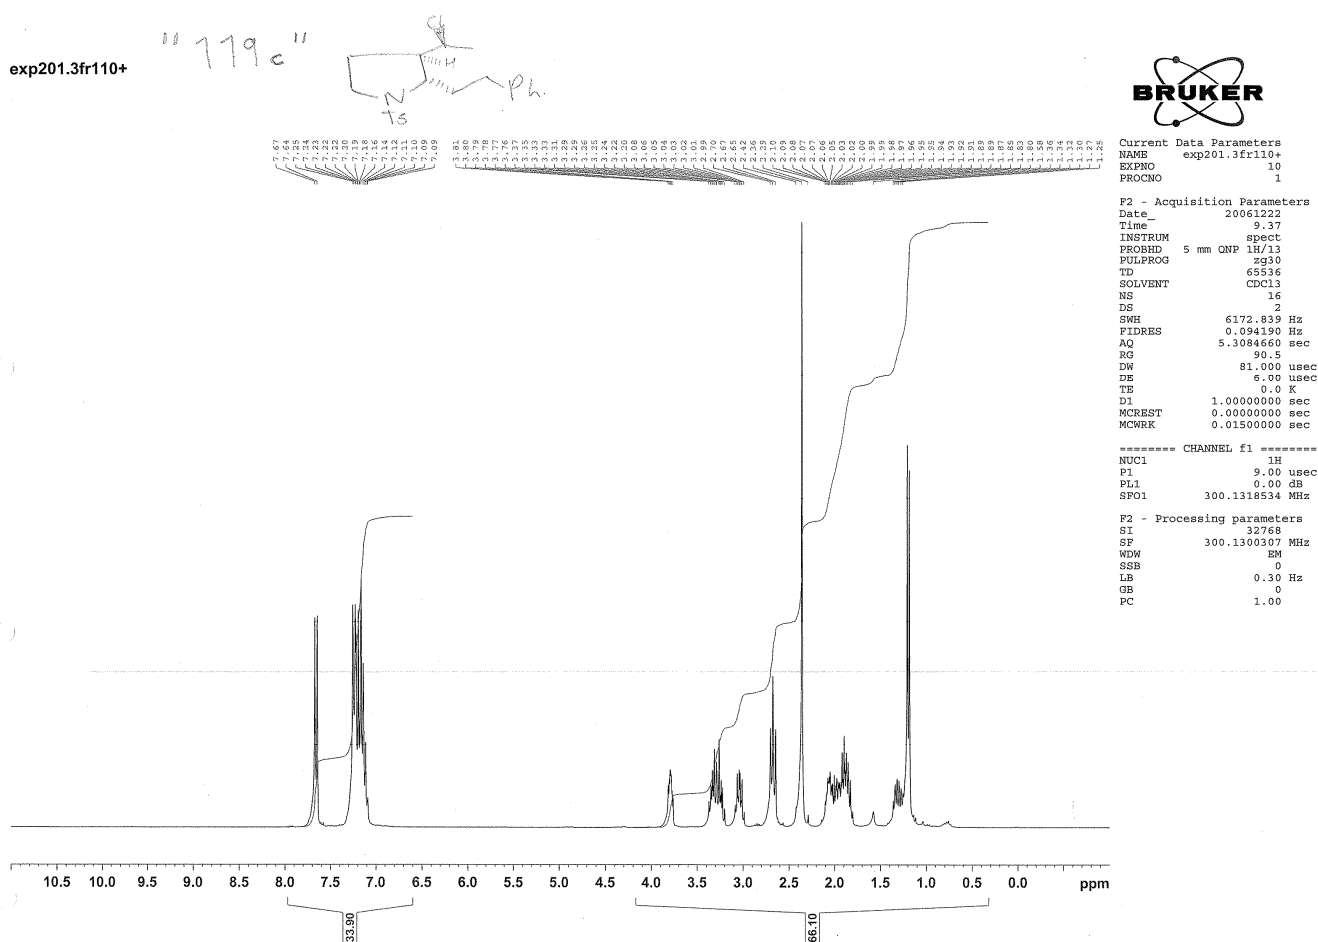

exp201.3fr110+

"179c"

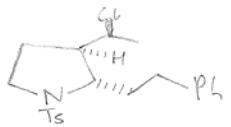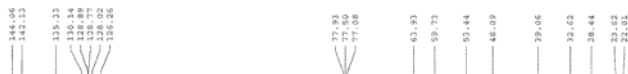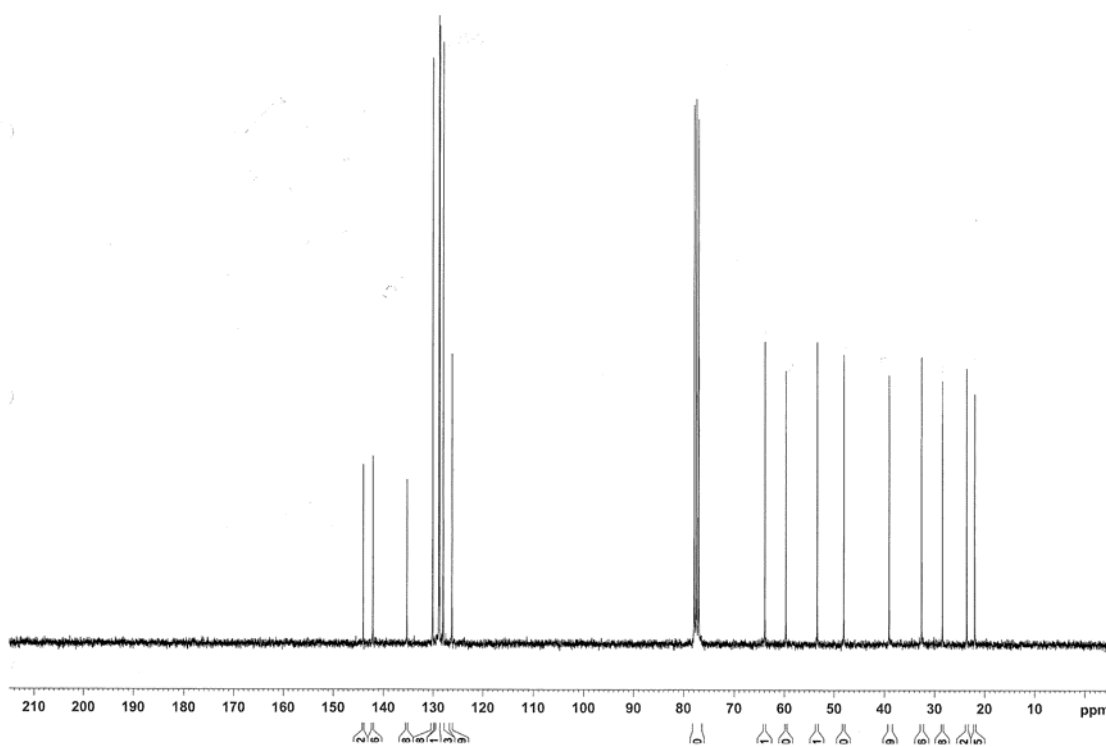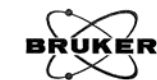

Current Data Parameters  
NAME exp201.3fr110+  
EXPNO 11  
PROCNO 1

F2 - Acquisition Parameters  
Date\_ 20061223  
Time 10.45  
INSTRUM spect  
PROBHD 5 mm QNP 1H/13  
PULPROG zgpg30  
TD 65536  
SOLVENT CDCl3  
NS 1024  
DS 4  
SWH 17985.611 Hz  
FIDRES 0.274439 Hz  
AQ 1.8219506 sec  
RG 1290.2  
DW 27.800 usec  
DE 6.00 usec  
TE 0.0 K  
D1 2.00000000 sec  
d11 0.03000000 sec  
DELTA 1.89999998 sec  
MCREST 0.00000000 sec  
MCWRK 0.01500000 sec

\*\*\*\*\* CHANNEL f1 \*\*\*\*\*  
NUC1 13C  
P1 8.00 usec  
PL1 0.00 dB  
SFO1 75.4752953 MHz

\*\*\*\*\* CHANNEL f2 \*\*\*\*\*  
CPDPRG2 waltz16  
NUC2 1H  
PCPD2 100.00 usec  
PL2 0.00 dB  
PL12 23.00 dB  
PL13 24.00 dB  
SFO2 300.1312005 MHz

F2 - Processing parameters  
SI 32768  
SF 75.4677190 MHz  
WDW EM  
SSB 0  
LB 1.00 Hz  
GB 0  
PC 1.40

exp201.3fr110+

"179c"

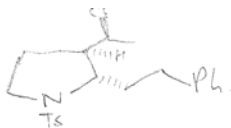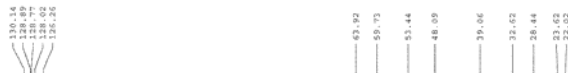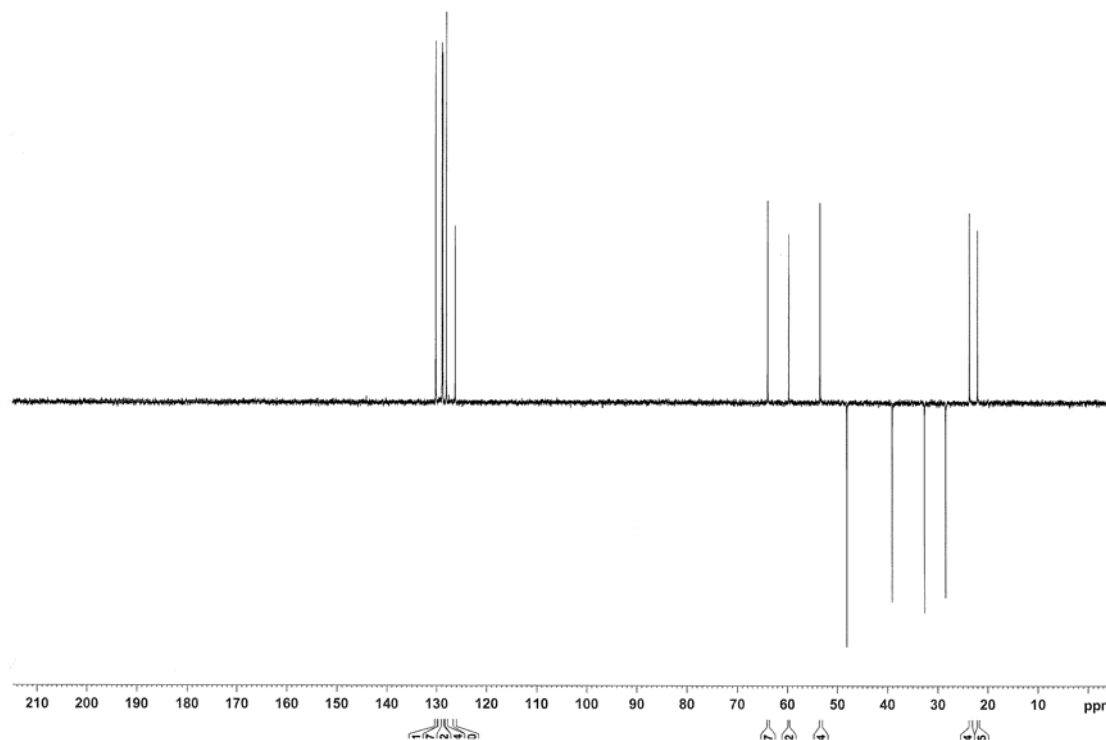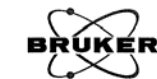

Current Data Parameters  
NAME exp201.3fr110+  
EXPNO 12  
PROCNO 1

F2 - Acquisition Parameters  
Date\_ 20061223  
Time 11.03  
INSTRUM spect  
PROBHD 5 mm QNP 1H/13  
PULPROG dept135  
TD 65536  
SOLVENT CDCl3  
NS 256  
DS 4  
SWH 17985.611 Hz  
FIDRES 0.274439 Hz  
AQ 1.8219506 sec  
RG 16384  
DW 27.800 usec  
DE 6.00 usec  
TE 0.0 K  
CNST2 145.0000000  
D1 2.00000000 sec  
d2 0.00344828 sec  
d12 0.00002000 sec  
DELTA 0.00001019 sec  
MCREST 0.00000000 sec  
MCWRK 0.01500000 sec

\*\*\*\*\* CHANNEL f1 \*\*\*\*\*  
NUC1 13C  
P1 8.00 usec  
p2 16.00 usec  
PL1 0.00 dB  
PL2 0.00 dB  
SFO1 75.4752953 MHz

\*\*\*\*\* CHANNEL f2 \*\*\*\*\*  
CPDPRG2 waltz16  
NUC2 1H  
P3 8.00 usec  
p4 16.00 usec  
PCPD2 100.00 usec  
PL2 0.00 dB  
PL12 23.00 dB  
SFO2 300.1312005 MHz

F2 - Processing parameters  
SI 32768  
SF 75.4677190 MHz  
WDW EM  
SSB 0  
LB 1.00 Hz  
GB 0  
PC 1.40

**(2R,3R,4S)-4-Chloro-2-cyclohexyl-3-methyl-1-tosylpiperidine/(2S,3S,4R)-4-Chloro-2-cyclohexyl-3-methyl-1-tosylpiperidine (26d) and (2S,3R)-3-((S)-1-Chloroethyl)-2-cyclohexyl-1-tosylpyrrolidine/(2R,3S)-3-((R)-1-Chloroethyl)-2-cyclohexyl-1-tosylpyrrolidine (27d)**

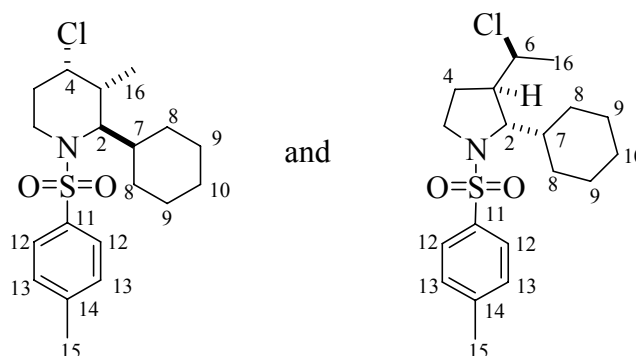

$C_{19}H_{28}ClNO_2S$   
Mol. Wt.: 369.95

Following the general procedure, (Z)-4-methyl-N-(pent-3-enyl)benzenesulfonamide (150 mg, 0.62 mmol) in the presence of cyclohexanecarbaldehyde (105 mg, 0.94 mmol), was consumed based on analysis by TLC after 144 hours of stirring at room temperature. The work up afforded a yellow oil, which was purified by flash column chromatography (90% hexane, 10% ethyl acetate) to give the two *title compounds*.

**(2R,3R,4S)-4-Chloro-2-cyclohexyl-3-methyl-1-tosylpiperidine/(2S,3S,4R)-4-Chloro-2-cyclohexyl-3-methyl-1-tosylpiperidine (26d)**

(60 mg, 0.16 mmol, 26%) as a white solid. M.p. 89-91 °C;  $\nu_{\max}(\text{KBr})/\text{cm}^{-1}$  3044, 2923, 1597;  $\delta_{\text{H}}$  (300 MHz;  $\text{CDCl}_3$ ) 7.70 (2H, d,  $J$  8.4, H-C12), 7.27 (2H, d,  $J$  8.4, H-C13), 4.34-4.24 (1H, m, H-C4), 3.76-3.64 (2H, m, H-C2 and H-C6), 2.98-2.83 (1H, m, H-C6), 2.42 (3H, s, H-C15), 2.39-2.28 (1H, m, H-C3), 1.85-1.71 (2H, m, H-C5), 1.77-1.53 (5H, m, H-C7 and H-C8), 1.27-0.99 (6H, m, H-C9 and H-C10), 0.95 (3H, d,  $J$  6.9, H-C16);  $\delta_{\text{C}}$  (75.5 MHz;  $\text{CDCl}_3$ ) 142.9 (C14), 138.3 (C11), 129.4 (C13), 127.1 (C12), 65.8 (C2), 57.6 (C4), 41.0 (C6), 36.1 (C3), 34.7 (C7), 31.0 (C8), 30.2 (C8), 29.5 (C5), 26.3 (C10), 26.2 (C9), 26.1 (C9), 21.5 (C15), 13.2 (C16);  $m/z$  (CI) 370 ( $\text{MH}^+$ , 100), 334 (12), 286 (10); Anal. Calcd. for  $C_{19}H_{28}ClNO_2S$  requires C, 61.68; H, 7.63; N, 3.79%. Found: C, 61.44; H, 7.72; N, 3.76%.



exp201.4fr24-48

"178d"

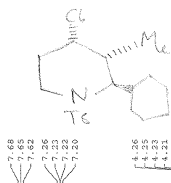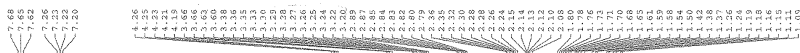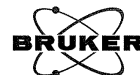

Current Data Parameters  
 NAME exp201.4fr24-48  
 EXPNO 10  
 PROCNO 1  
 F2 - Acquisition Parameters  
 Date\_ 20061222  
 Time 16.34  
 INSTRUM spect  
 PROBHD 5 mm QNP 1H/13  
 PULPROG zg30  
 TD 65536  
 SOLVENT CDCl3  
 NS 16  
 DS 2  
 SWH 6172.839 Hz  
 FIDRES 0.094190 Hz  
 AQ 5.3084660 sec  
 RG 228.1  
 DW 81.000 usec  
 DE 6.00 usec  
 TE 0.0 K  
 D1 1.00000000 sec  
 MCREST 0.00000000 sec  
 MCWRK 0.01500000 sec  
 ===== CHANNEL f1 =====  
 NUC1 1H  
 P1 9.00 usec  
 PL1 0.00 dB  
 SFO1 300.1318534 MHz  
 F2 - Processing parameters  
 SI 32768  
 SF 300.1300255 MHz  
 WDW EM  
 SSB 0  
 LB 0.30 Hz  
 GB 0  
 PC 1.00

exp201.4fr24-48

"178d"

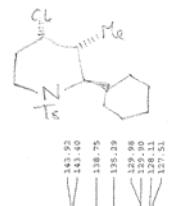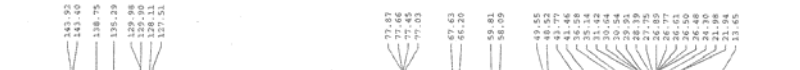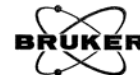

Current Data Parameters  
 NAME exp201.4fr24-48  
 EXPNO 11  
 PROCNO 1  
 F2 - Acquisition Parameters  
 Date\_ 20061222  
 Time 17.42  
 INSTRUM spect  
 PROBHD 5 mm QNP 1H/13  
 PULPROG zgpg30  
 TD 65536  
 SOLVENT CDCl3  
 NS 1024  
 DS 4  
 SWH 17985.611 Hz  
 FIDRES 0.274439 Hz  
 AQ 1.8219508 sec  
 RG 1290.2  
 DW 27.800 usec  
 DE 6.00 usec  
 TE 0.0 K  
 D1 2.00000000 sec  
 d11 0.03000000 sec  
 DELTA 1.89999998 sec  
 MCREST 0.00000000 sec  
 MCWRK 0.01500000 sec  
 ===== CHANNEL f1 =====  
 NUC1 13C  
 P1 8.00 usec  
 PL1 0.00 dB  
 SFO1 75.4752953 MHz  
 ===== CHANNEL f2 =====  
 CPDPRG2 waltz16  
 NUC2 1H  
 PCPD2 100.00 usec  
 PL2 0.00 dB  
 PL12 23.00 dB  
 PL13 24.00 dB  
 SFO2 300.1312005 MHz  
 F2 - Processing parameters  
 SI 32768  
 SF 75.4677190 MHz  
 WDW EM  
 SSB 0  
 LB 1.00 Hz  
 GB 0  
 PC 1.40

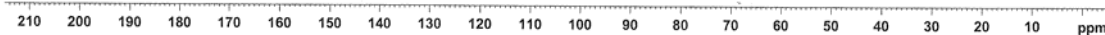

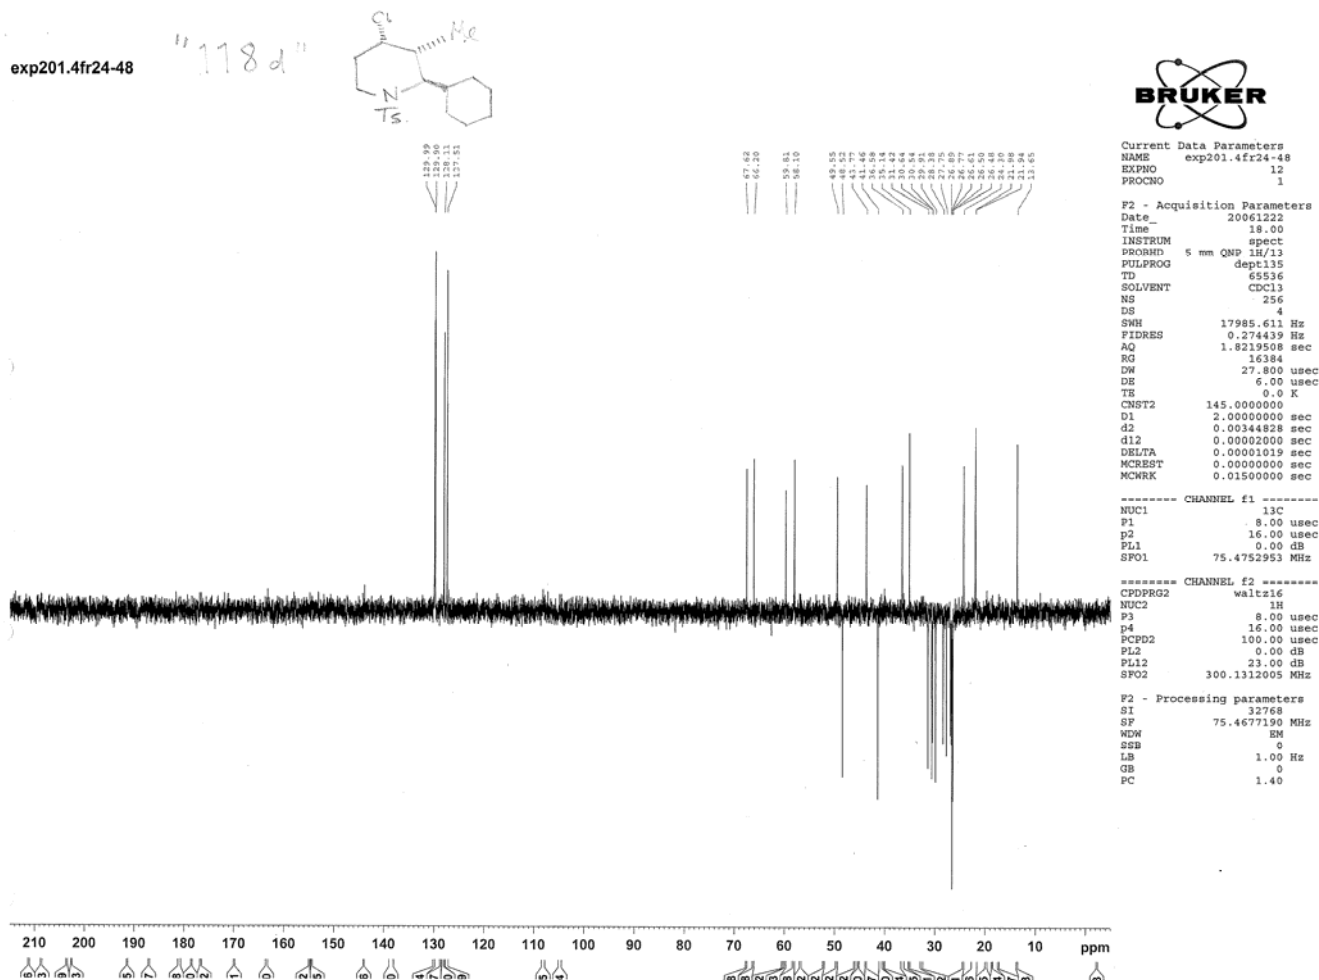

**(2S,3R)-3-((S)-1-Chloroethyl)-2-cyclohexyl-1-tosylpyrrolidine/(2R,3S)-3-((R)-1-Chloroethyl)-2-cyclohexyl-1-tosylpyrrolidine (27d)**

Further elution (90% hexane 10% ethyl acetate) provided the other *title compound* (115 mg, 0.31 mmol, 50%) as a white solid. M.p. 109-112 °C;  $\nu_{\max}(\text{KBr})/\text{cm}^{-1}$  2918, 1670, 1597;  $\delta_{\text{H}}$  (300 MHz;  $\text{CDCl}_3$ ) 7.74 (2H, d,  $J$  8.1, H-C12), 7.30 (2H, d,  $J$  8.1, H-C13), 3.69 (1H, dd,  $J$  4.3, 2.5, H-C2), 3.38-3.30 (1H, m, H-C5), 3.28-3.19 (1H, m, H-C5), 3.02 (1H, qd,  $J$  8.8, 6.5, H-C6), 2.41 (3H, s, H-C15), 2.17-2.09 (1H, m, H-C3), 1.98-1.83 (1H, m, H-C4), 1.78-1.58 (5H, m, H-C7 and H-C8), 1.38 (1H, ddd,  $J$  16.8, 8.1, 4.8, H-C4), 1.16 (3H, d,  $J$  6.5, H-C16), 1.22-0.76 (6H, m, H-C9 and H-C10);  $\delta_{\text{C}}$  (75.5 MHz;  $\text{CDCl}_3$ ) 143.4 (C14), 134.8 (C11), 129.5 (C13), 127.6 (C12), 68.1 (C2), 59.5 (C6), 49.6 (C3), 48.0 (C5), 43.3 (C7), 29.8 (C8), 28.5 (C8), 27.9 (C4), 26.4 (C10), 26.3 (C9), 26.2 (C9), 22.7 (C16), 21.5 (C15);  $m/z$  (CI) 370 ( $\text{MH}^+$ , 100), 334 (28), 286 (20); Anal. Calcd. for  $\text{C}_{19}\text{H}_{28}\text{ClNO}_2\text{S}$  requires C, 61.69; H, 7.63; N, 3.79%. Found: C, 61.65; H, 7.84; N, 3.66%; HRMS (ES) Found  $[\text{M}+\text{H}]^+$  370.1602,  $\text{C}_{19}\text{H}_{29}\text{ClNO}_2\text{S}$  requires 370.1599.

Crystal data.  $\text{C}_{19}\text{H}_{28}\text{ClNO}_2\text{S}$ ;  $M = 369.93$ ; Orthorhombic; Space group  $P212121$ ;  $a = 9.5924(3)$  Å,  $b = 12.9905(3)$  Å,  $c = 15.0218(4)$  Å; Volume 1871.87(9) Å<sup>3</sup>;  $T = 120$  K;  $Z$  4; 16779 reflections measured, 4283 unique [ $R_{\text{int}} = 0.0484$ ]. The final R values  $R1 = 0.0376$ ,  $wR2 = 0.0826$  (observed) and  $R1 = 0.0516$ ,  $wR2 =$

0.0886 (all).

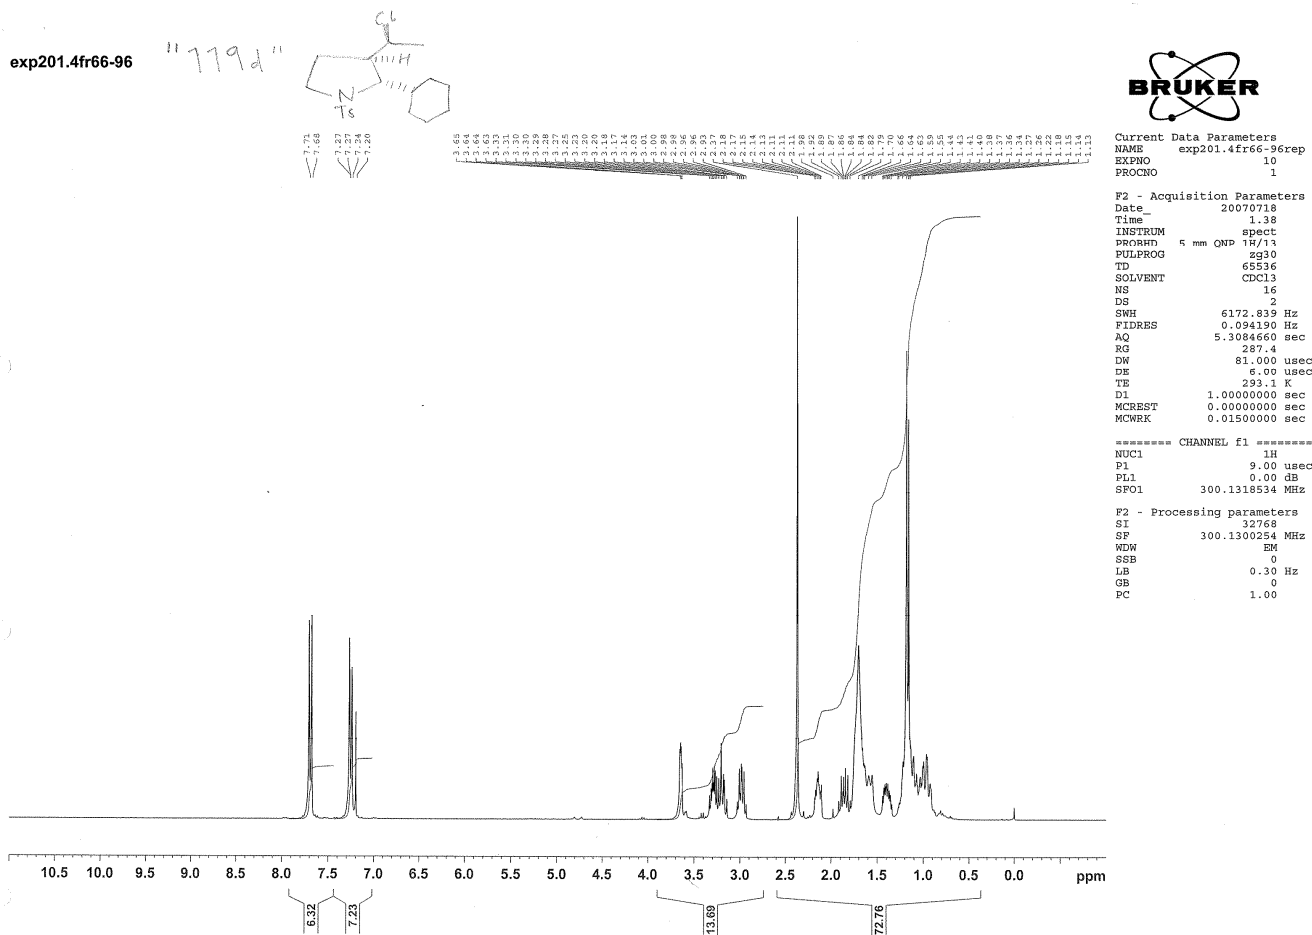

exp201.4fr66-96

"179d"

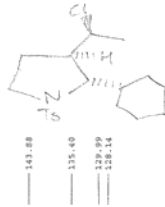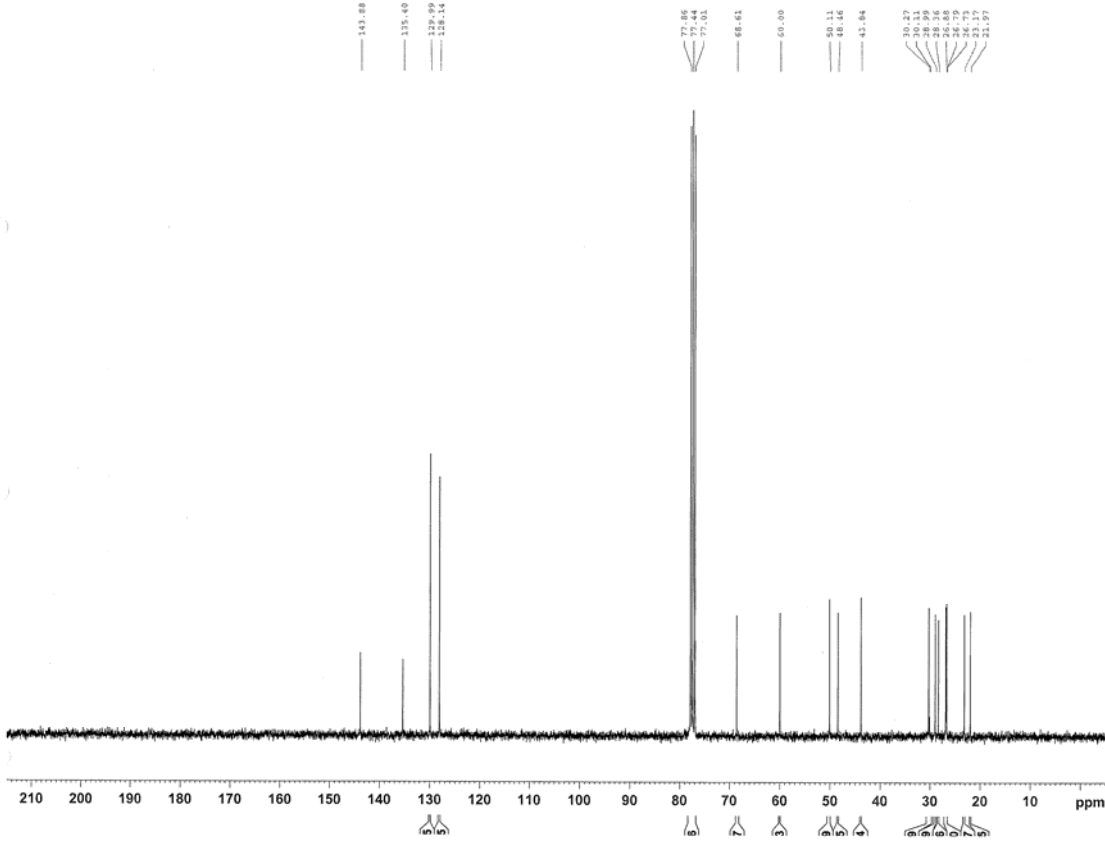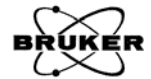

Current Data Parameters  
 NAME exp201.4fr66-96rep  
 EXPNO 11  
 PROCNO 1

F2 - Acquisition Parameters  
 Date\_ 2007018  
 Time 2.46  
 INSTRUM spect  
 PROBHD 5 mm QNP 1H/13  
 PULPROG zgpg30  
 TD 65536  
 SOLVENT CDCl3  
 NS 1024  
 DS 4  
 SWH 17985.611 Hz  
 FIDRES 0.274439 Hz  
 AQ 1.8219508 sec  
 RG 1024  
 DW 27.800 usec  
 DE 6.00 usec  
 TE 293.3 K  
 D1 2.00000000 sec  
 d11 0.03000000 sec  
 DELTA 1.89999998 sec  
 MCREST 0.00000000 sec  
 MCWRC 0.01500000 sec

\*\*\*\*\* CHANNEL f1 \*\*\*\*\*  
 NUC1 13C  
 P1 8.00 usec  
 PL1 0.00 dB  
 SFO1 75.4752953 MHz

\*\*\*\*\* CHANNEL f2 \*\*\*\*\*  
 CPDPRG2 waltz16  
 NUC2 1H  
 PCPD2 100.00 usec  
 PL2 0.00 dB  
 PL12 23.00 dB  
 PL13 24.00 dB  
 SFO2 300.1312005 MHz

F2 - Processing parameters  
 SI 32768  
 SF 75.4677190 MHz  
 WDW EM  
 SSB 0  
 LB 1.00 Hz  
 GB 0  
 PC 1.40

exp201.4fr66-96

"179d"

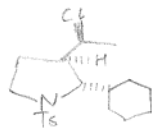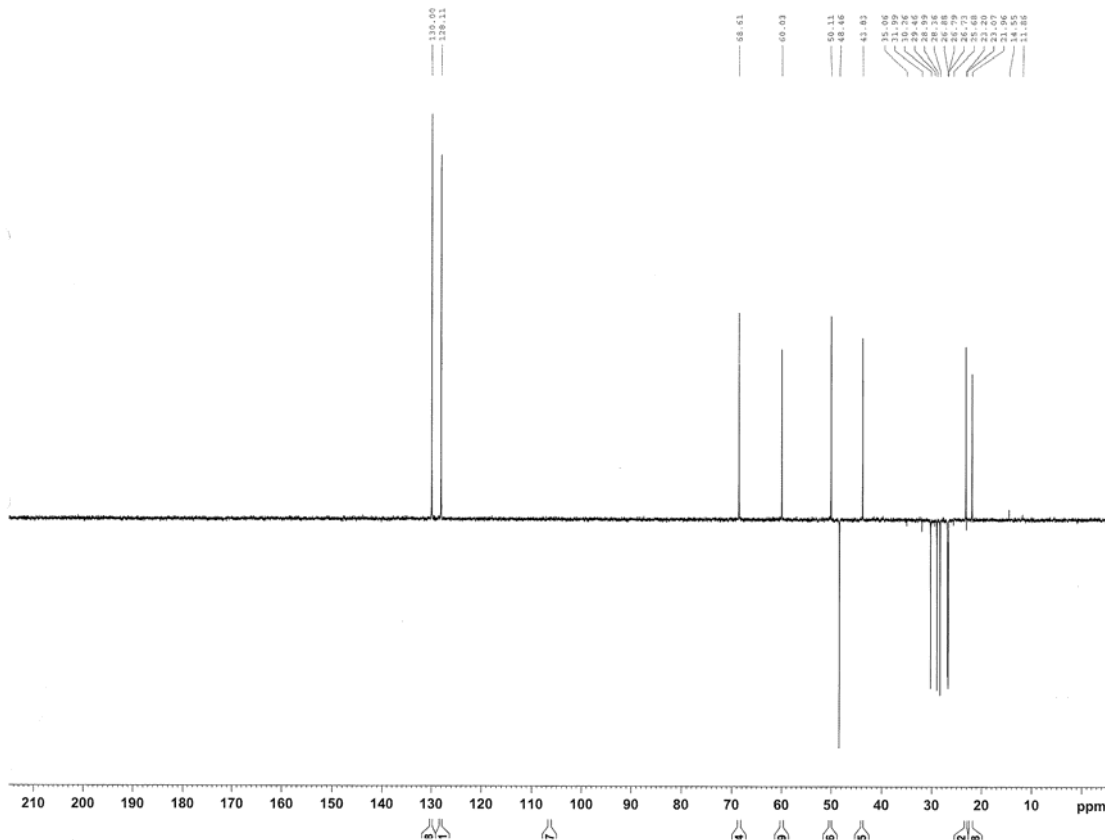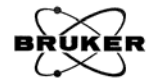

Current Data Parameters  
 NAME exp201.4fr66-96  
 EXPNO 12  
 PROCNO 1

F2 - Acquisition Parameters  
 Date\_ 20061014  
 Time 0.37  
 INSTRUM spect  
 PROBHD 5 mm QNP 1H/13  
 PULPROG dept135  
 TD 65536  
 SOLVENT CDCl3  
 NS 256  
 DS 4  
 SWH 17985.611 Hz  
 FIDRES 0.274439 Hz  
 AQ 1.8219508 sec  
 RG 16384  
 DW 27.800 usec  
 DE 6.00 usec  
 TE 292.5 K  
 CNST2 145.000000  
 I1 2.00000000 sec  
 d2 0.00344828 sec  
 d12 0.00002000 sec  
 DELTA 0.00001019 sec  
 MCREST 0.00000000 sec  
 MCWRC 0.01500000 sec

\*\*\*\*\* CHANNEL f1 \*\*\*\*\*  
 NUC1 13C  
 P1 8.00 usec  
 P2 16.00 usec  
 PL1 0.00 dB  
 SFO1 75.4752953 MHz

\*\*\*\*\* CHANNEL f2 \*\*\*\*\*  
 CPDPRG2 waltz16  
 NUC2 1H  
 P3 8.00 usec  
 P4 16.00 usec  
 PCPD2 100.00 usec  
 PL2 0.00 dB  
 PL12 23.00 dB  
 SFO2 300.1312005 MHz

F2 - Processing parameters  
 SI 32768  
 SF 75.4677190 MHz  
 WDW EM  
 SSB 0  
 LB 1.00 Hz  
 GB 0  
 PC 1.40

**(2*S*,3*R*,4*S*)-Ethyl-4-chloro-3-methyl-1-tosylpiperidine-2-carboxylate/(2*R*,3*S*,4*R*)-Ethyl-4-chloro-3-methyl-1-tosylpiperidine-2-carboxylate (26e)**

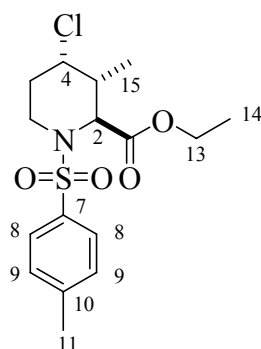

C<sub>16</sub>H<sub>22</sub>ClNO<sub>4</sub>S  
Mol. Wt.: 359.87

Following the general procedure, (*Z*)-4-methyl-*N*-(pent-3-enyl)benzenesulfonamide (40 mg, 0.17 mmol), in the presence of a pre-heated 33% solution of ethyl 2-oxoacetate in toluene (76 mg, 0.25 mmol, 1.50 eq.), was consumed based on analysis by TLC after 1 hour of stirring at room temperature. The work up afforded a yellow oil, which was purified by flash column chromatography (90% hexane, 10% ethyl acetate) to give the *title compound* (12 mg, 0.03 mmol, 20%) as a pale yellow oil.

$\nu_{\max}(\text{neat})/\text{cm}^{-1}$  2927, 1736, 1598;  $\delta_{\text{H}}$  (300 MHz; CDCl<sub>3</sub>) 7.66 (2H, d, *J* 8.3, H-C8), 7.29 (2H, d, *J* 8.3, H-C9), 4.54 (1H, d, *J* 1.2, H-C2), 4.13-4.02 (1H, m, H-C4), 4.04-3.94 (2H, m, H-C13), 3.79-3.70 (1H, m, H-C6), 3.31 (1H, td, *J* 12.4, 3.4, H-C6), 2.69-2.58 (1H, m, H-C3), 2.42 (3H, s, H-C11), 2.13-1.97 (1H, m, H-C5), 1.94-1.82 (1H, m, H-C5), 1.25 (3H, d, *J* 6.9, H-C15), 1.16 (3H, t, *J* 7.1, H-C14);  $\delta_{\text{C}}$  (75.5 MHz; CDCl<sub>3</sub>) 169.9 (C12), 143.4 (C10), 136.3 (C7), 129.4 (C9), 127.2 (C8), 61.6 (C13), 61.0 (C2), 57.2 (C4), 42.3 (C6), 37.2 (C3), 29.3 (C5), 21.5 (C11), 13.9 (C14), 11.9 (C15); *m/z* (CI) 360 (MH<sup>+</sup>, 90), 286 (45), 206 (100); HRMS (ES) Found [M+H]<sup>+</sup> 360.1027, C<sub>16</sub>H<sub>23</sub>ClNO<sub>4</sub>S requires 360.1031.

exp218.1fr70-96

"118e"

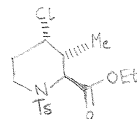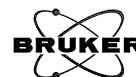

```

Current Data Parameters
NAME      exp218.1fr70-96
EXPNO    10
PROCNO    1

F2 - Acquisition Parameters
Date_     20061223
Time      2.44
INSTRUM   spect
PROBHD    5 mm ONP 1H/13
PULPROG   zg30
TD         65536
SOLVENT   CDCl3
NS         32
DS         2
SWH        6172.839 Hz
FIDRES     0.094190 Hz
AQ         5.3094650 sec
RG         574.7
DW         81.000 usec
DE         6.00 usec
TE         0.0 K
D1         1.0000000 sec
MCRESST   0.0000000 sec
MCWRK     0.0150000 sec

===== CHANNEL f1 =====
NUC1      1H
P1        9.00 usec
PL1       0.00 dB
SFO1      300.1318534 MHz

F2 - Processing parameters
SI        32768
SF        300.1300260 MHz
WDW       EM
SSB       0
LB        0.30 Hz
GB        0
PC        1.00
  
```

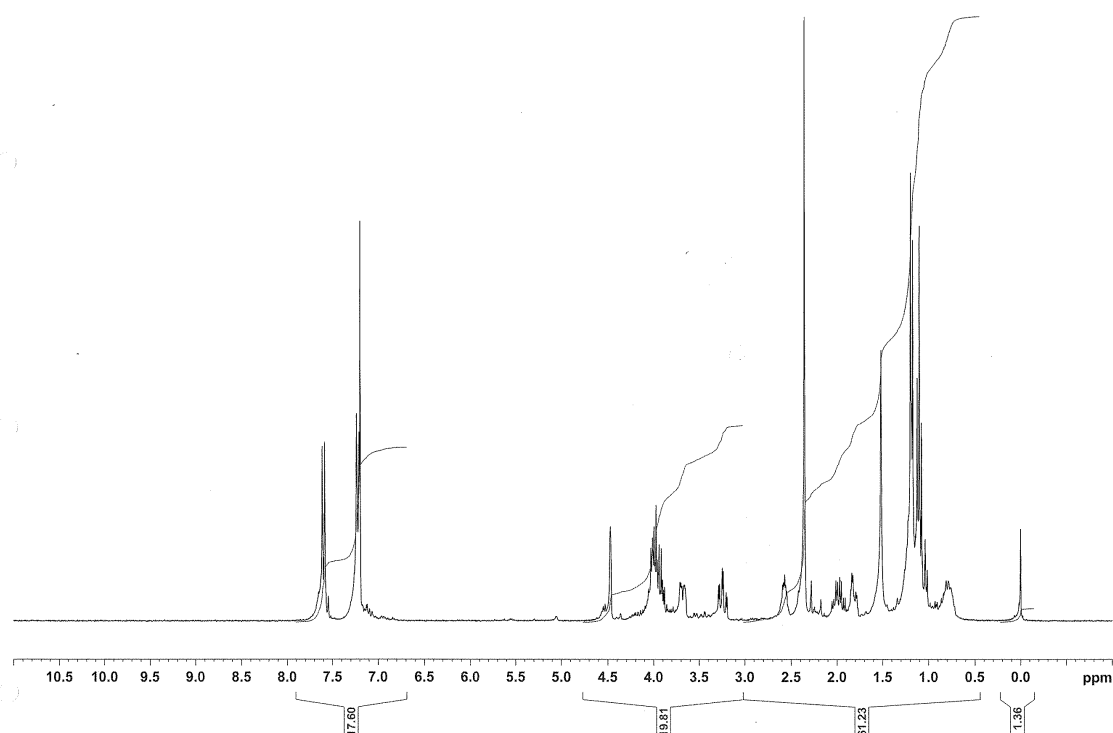

**(2R,3R,4S)-4-Chloro-3-ethyl-2-heptyl-1-tosylpiperidine/(2S,3S,4R)-4-Chloro-3-ethyl-2-heptyl-1-tosylpiperidine (28a) and (2S,3R)-3-((S)-1-Chloropropyl)-2-heptyl-1-tosylpyrrolidine/(2R,3S)-3-((R)-1-Chloropropyl)-2-heptyl-1-tosylpyrrolidine (29a)**

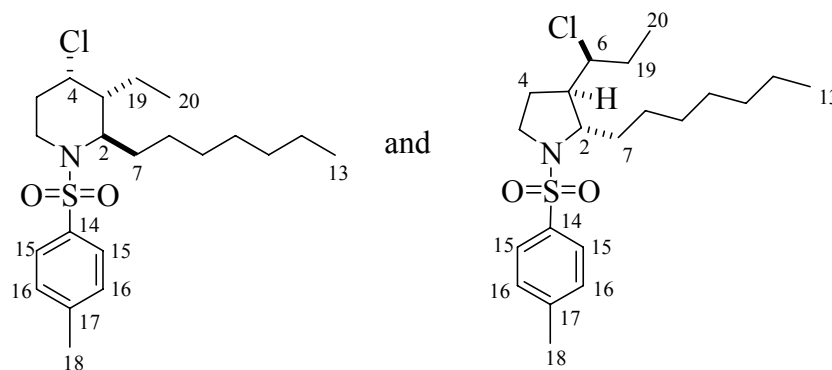

$C_{21}H_{34}ClNO_2S$   
Mol. Wt.: 400.02

Following the general procedure, (Z)-N-(hex-3-enyl)-4-methylbenzenesulfonamide (500 mg, 1.97 mmol), in the presence of octanal (379 mg, 2.96 mmol), was consumed based on analysis by TLC after 17 hours of stirring at room temperature. The work up afforded a yellow oil, which was purified by flash column chromatography (90% hexane, 10% ethyl acetate) to give two title compounds.

**(2R,3R,4S)-4-Chloro-3-ethyl-2-heptyl-1-tosylpiperidine/(2S,3S,4R)-4-Chloro-3-ethyl-2-heptyl-1-tosylpiperidine (28a)**

323 mg, (0.81 mmol, 41%) as a colourless oil.

$\nu_{\max}(\text{neat})/\text{cm}^{-1}$  2957, 1729, 1598;  $\delta_{\text{H}}$  (300 MHz;  $\text{CDCl}_3$ ) 7.66 (2H, d,  $J$  8.4, H-C15), 7.26 (2H, d,  $J$  8.4, H-C16), 4.37-4.28 (1H, m, H-C4), 4.11-4.03 (1H, m, H-C2), 3.79-3.69 (1H, m, H-C6), 3.01-2.87 (1H, m, H-C6), 2.40 (3H, s, H-C18), 1.91-1.74 (2H, m, H-C5), 1.75-1.63 (1H, m, H-C3), 1.59-1.29 (2H, m, H-C7), 1.32-1.23 (8H, m, H-C8 to H-C11), 1.23-1.16 (4H, m, H-C19 and H-C12), 0.94 (3H, t,  $J$  7.3, H-C20), 0.87 (3H, t,  $J$  6.8, H-C13);  $\delta_{\text{C}}$  (75.5 MHz;  $\text{CDCl}_3$ ) 143.0 (C17), 138.1 (C14), 129.5 (C16), 126.8 (C15), 58.1 (C4), 55.8 (C2), 44.7 (C3), 40.6 (C6), 31.7 (C11), 30.9 (C5), 29.1 (C9 and C10), 26.7 (C8), 22.6 (C12), 22.6 (C7), 21.4 (C18), 17.4 (C19), 14.0 (C13), 12.3 (C20);  $m/z$  (CI) 400 ( $\text{MH}^+$ , 100), 364 (78), 300 (42); HRMS (ES) Found  $[\text{M}+\text{H}]^+$  400.2073,  $\text{C}_{21}\text{H}_{35}\text{ClNO}_2\text{S}$  requires 400.2072.

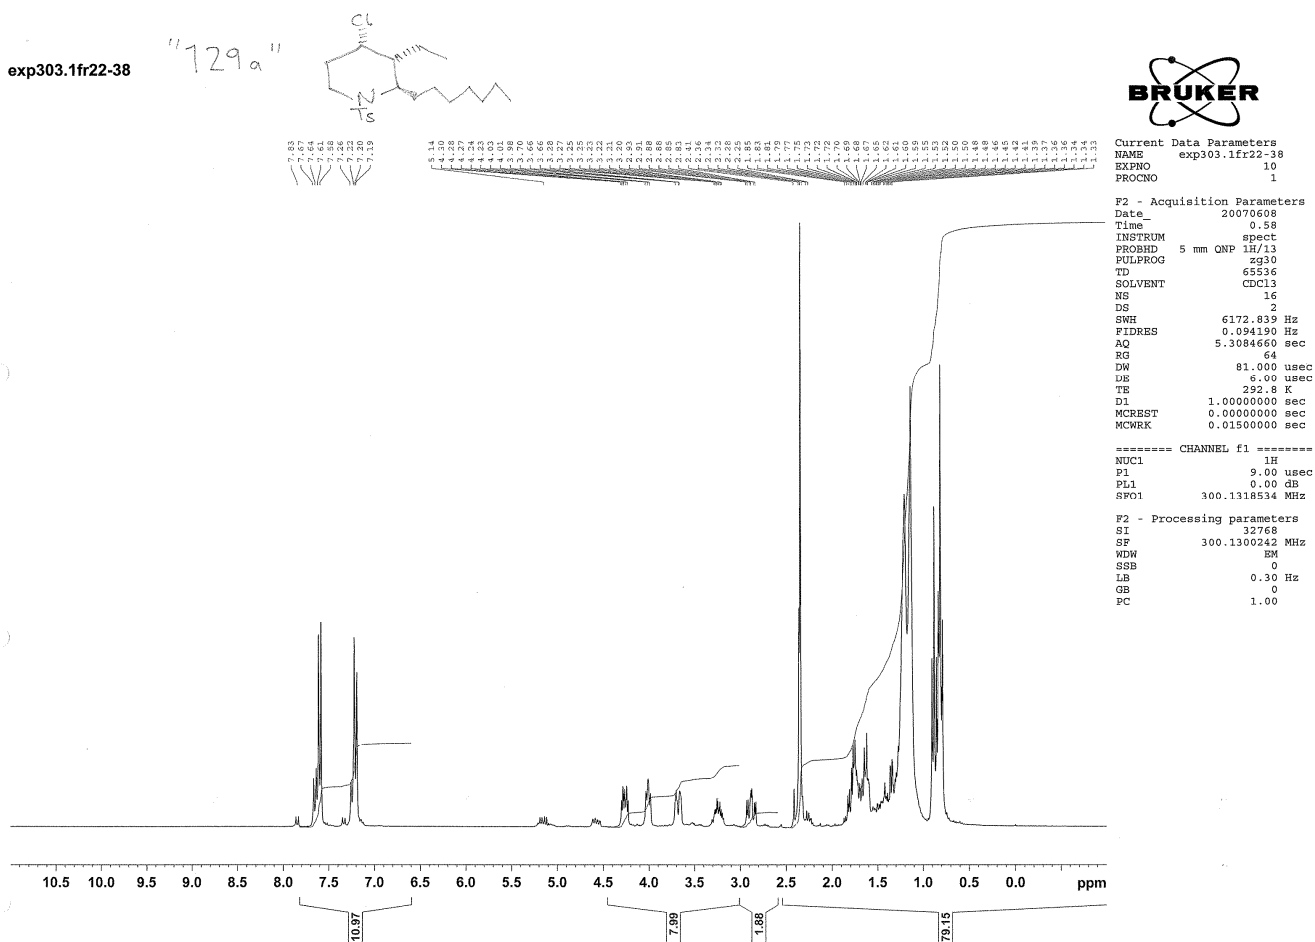

exp303.1fr22-38

"129a"

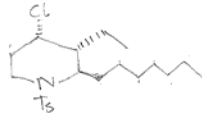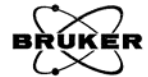

143.97  
143.92  
138.30  
138.20  
132.42  
130.65  
129.85  
129.65  
127.44  
127.26  
127.15  
125.15

77.48  
77.48  
77.08  
66.70  
66.70  
62.95  
62.95  
58.25  
58.25  
50.87  
48.12  
46.04  
41.08  
33.29  
33.29  
32.18  
31.89  
31.89  
31.28  
31.28  
31.02  
30.02  
28.59  
28.59  
28.35  
28.35  
26.48  
26.48  
21.58  
21.58  
21.04  
21.04  
21.89  
21.89  
14.84  
14.84

Current Data Parameters  
NAME exp303.1fr22-38  
EXPNO 12  
PROCNO 1

F2 - Acquisition Parameters  
Date\_ 20070608  
Time 2.06  
INSTRUM spect  
PROBHD 5 mm QNP 1H/13  
PULPROG zgpg30  
TD 65536  
SOLVENT CDCl3  
NS 1024  
DS 4  
SWH 17985.611 Hz  
FIDRES 0.274439 Hz  
AQ 1.8219508 sec  
RG 1448.2  
DW 27.800 usec  
DE 6.00 usec  
TE 293.1 K  
D1 2.0000000 sec  
d11 0.0300000 sec  
DELTA 1.8999998 sec  
MCREST 0.0000000 sec  
MCWRK 0.0150000 sec

----- CHANNEL f1 -----  
NUC1 13C  
P1 8.00 usec  
PL1 0.00 dB  
SFO1 75.4752953 MHz

----- CHANNEL f2 -----  
CPDPRG2 waltz16  
NUC2 1H  
PCPD2 100.00 usec  
PL2 0.00 dB  
PL12 23.00 dB  
PL13 24.00 dB  
SFO2 300.1312005 MHz

F2 - Processing parameters  
SI 32768  
SF 75.4677190 MHz  
WDW EM  
SSB 0  
LB 1.00 Hz  
GB 0  
PC 1.40

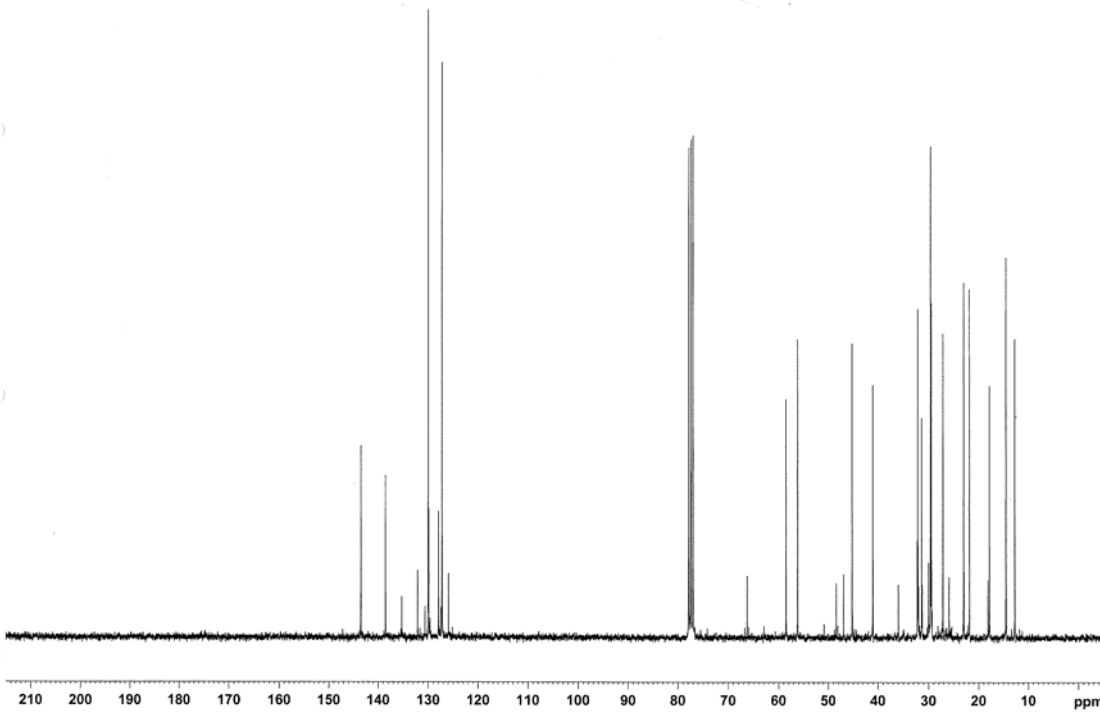

exp303.1fr22-38

"129a"

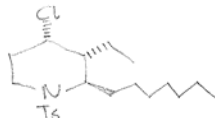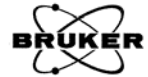

132.12  
130.65  
130.65  
129.66  
129.66  
127.71  
127.52  
127.26  
127.26  
125.25

74.20  
74.20  
66.31  
66.31  
62.95  
62.95  
58.55  
58.55  
50.87  
48.10  
46.10  
44.77  
44.77  
41.08  
36.67  
32.55  
32.55  
31.39  
31.39  
30.82  
29.70  
29.49  
29.35  
28.56  
28.56  
25.75  
25.75  
21.59  
21.59  
21.85  
21.85  
14.80  
14.80  
12.85

Current Data Parameters  
NAME exp303.1fr22-38  
EXPNO 12  
PROCNO 1

F2 - Acquisition Parameters  
Date\_ 20070608  
Time 2.24  
INSTRUM spect  
PROBHD 5 mm QNP 1H/13  
PULPROG dept135  
TD 65536  
SOLVENT CDCl3  
NS 256  
DS 4  
SWH 17985.611 Hz  
FIDRES 0.274439 Hz  
AQ 1.8219508 sec  
RG 16384  
DW 27.800 usec  
DE 6.00 usec  
TE 292.9 K  
CNST2 145.0000000  
D1 2.0000000 sec  
d2 0.00344828 sec  
d12 0.00002000 sec  
DELTA 0.00001019 sec  
MCREST 0.0000000 sec  
MCWRK 0.0150000 sec

----- CHANNEL f1 -----  
NUC1 13C  
P1 8.00 usec  
PL1 16.00 dB  
SFO1 75.4752953 MHz

----- CHANNEL f2 -----  
CPDPRG2 waltz16  
NUC2 1H  
P3 8.00 usec  
P4 16.00 usec  
PCPD2 100.00 usec  
PL2 0.00 dB  
PL12 23.00 dB  
SFO2 300.1312005 MHz

F2 - Processing parameters  
SI 32768  
SF 75.4677190 MHz  
WDW EM  
SSB 0  
LB 1.00 Hz  
GB 0  
PC 1.40

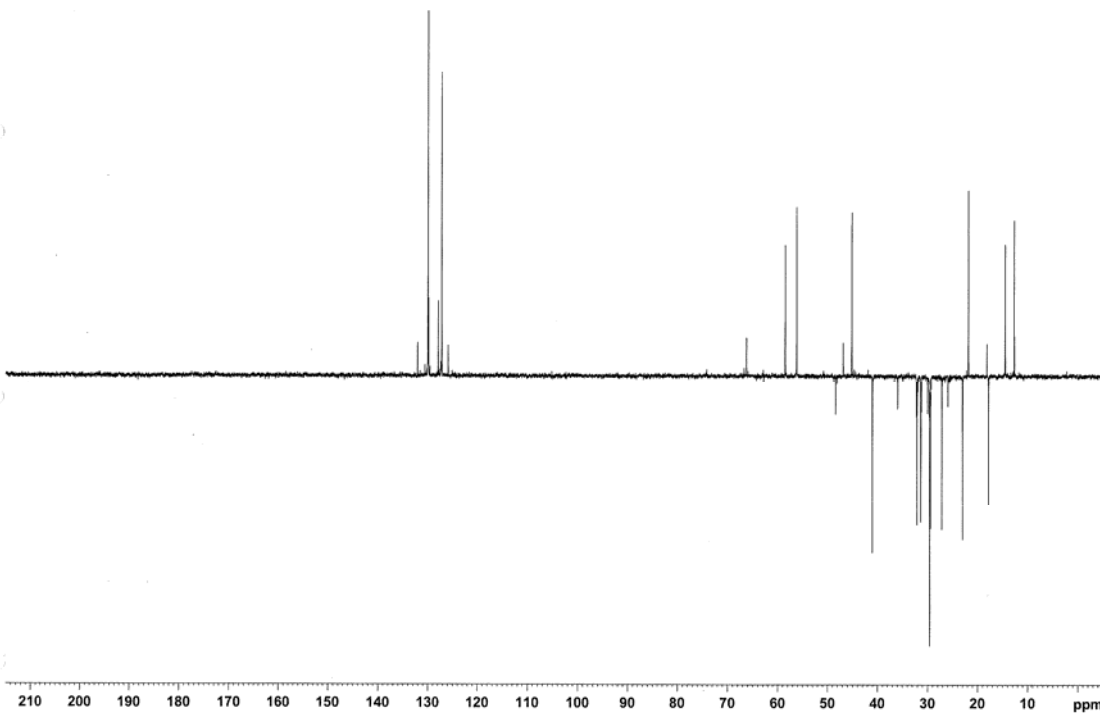



**(2*S*,3*R*)-3-((*S*)-1-Chloropropyl)-2-heptyl-1-tosylpyrrolidine/(2*R*,3*S*)-3-((*R*)-1-Chloropropyl)-2-heptyl-1-tosylpyrrolidine (29a)**

Further elution (90% hexane 10% ethyl acetate) provided the other *title compound* (339 mg, 0.85 mmol, 43%) as a colourless oil.  $\nu_{\max}(\text{neat})/\text{cm}^{-1}$  2954, 1597,  $\delta_{\text{H}}$  (300 MHz;  $\text{CDCl}_3$ ) 7.73 (2H, d,  $J$  8.3, H-C15), 7.30 (2H, d,  $J$  8.3, H-C16), 3.83-3.77 (1H, m, H-C2), 3.39-3.20 (2H, m, H-C5), 2.78 (1H, dt,  $J$  9.1, 2.8, H-C6), 2.41 (3H, s, H-C18), 2.16-2.05 (1H, m, H-C3), 1.96-1.82 (1H, m, H-C4), 1.73-1.54 (2H, m, H-C7), 1.60-1.39 (2H, m, H-C19), 1.43-1.29 (1H, m, H-C4), 1.31-1.19 (10H, m, H-C8 to H-C12), 0.86 (3H, t,  $J$  6.5, H-C13), 0.83 (3H, t,  $J$  7.2, H-C20);  $\delta_{\text{C}}$  (75.5 MHz;  $\text{CDCl}_3$ ) 143.4 (C17), 135.0 (C14), 129.5 (C16), 127.5 (C15), 66.7 (C6), 63.7 (C2), 50.7 (C3), 47.4 (C5), 36.9 (C7), 31.8 (C11), 29.3 (C9 and C10), 28.5 (C19), 27.8 (C4), 25.8 (C8), 22.6 (C12), 21.4 (C18), 14.0 (C20), 10.5 (C13);  $m/z$  (CI) 400 ( $\text{MH}^+$ , 100), 364 (40), 300 (25); Anal. Calcd. for  $\text{C}_{21}\text{H}_{34}\text{ClNO}_2\text{S}$  requires C, 63.05; H, 8.57; N, 3.50%. Found: C, 62.99; H, 8.83; N, 3.50%.

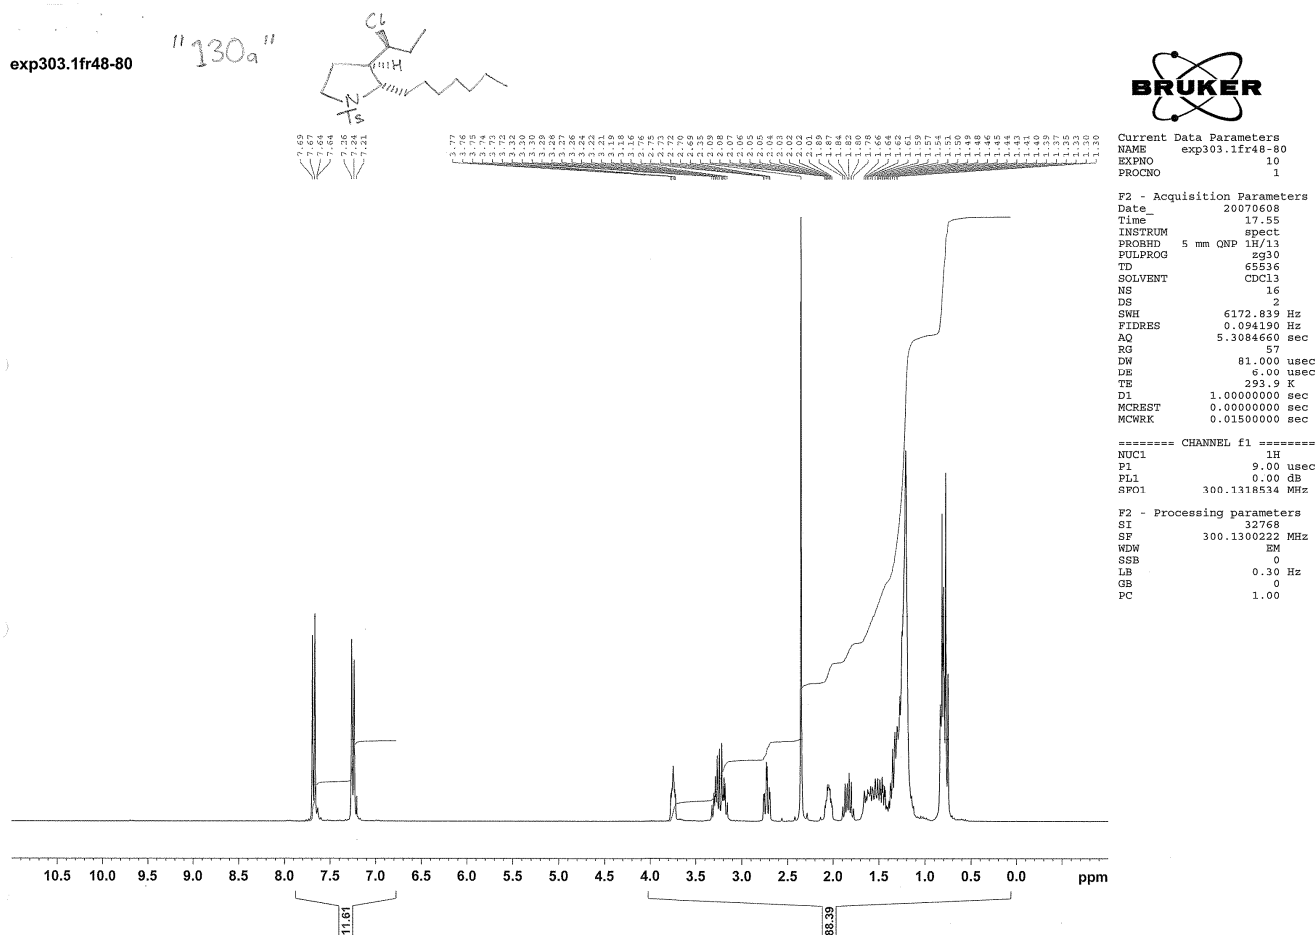

exp303.1fr48-80

"130a"

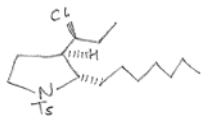

143.86  
143.85  
135.54  
135.30  
130.01  
127.86  
127.81

77.92  
77.49  
77.07  
62.21  
61.22  
56.77  
56.64  
47.85  
47.87  
44.12  
44.13  
39.49  
35.44  
35.01  
29.91  
29.44  
29.45  
28.28  
28.29  
26.60  
26.61  
21.97  
21.98  
14.52  
14.53  
11.00

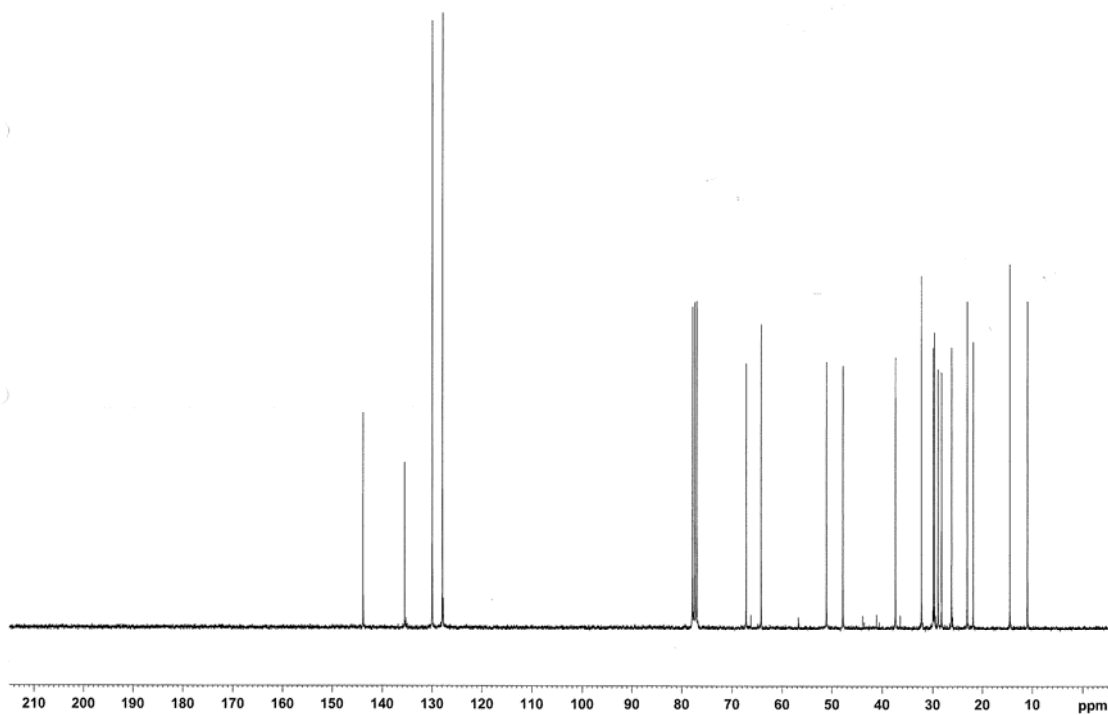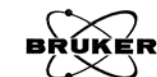

Current Data Parameters  
NAME exp303.1fr48-80  
EXPNO 12  
PROCNO 1

F2 - Acquisition Parameters  
Date\_ 20070608  
Time 19.03  
INSTRUM spect  
PROBHD 5 mm QNP 1H/13  
PULPROG zgpg30  
TD 65536  
SOLVENT CDCl3  
NS 1024  
DS 4  
SWH 17985.611 Hz  
FIDRES 0.274439 Hz  
AQ 1.8219508 sec  
RG 645.1  
DW 27.800 usec  
DE 6.00 usec  
TE 294.4 K  
D1 2.0000000 sec  
d11 0.0300000 sec  
DELTA 1.8999998 sec  
MCREST 0.0000000 sec  
MCWRK 0.0150000 sec

----- CHANNEL f1 -----  
NUC1 13C  
P1 8.00 usec  
PL1 0.00 dB  
SFO1 75.4752953 MHz

----- CHANNEL f2 -----  
CDDPRG2 waltz16  
NUC2 1H  
PCPD2 100.00 usec  
PL2 0.00 dB  
PL12 23.00 dB  
PL13 24.00 dB  
SFO2 300.1312005 MHz

F2 - Processing parameters  
SI 32768  
SF 75.4677190 MHz  
WDW EM  
SSB 0  
LB 1.00 Hz  
GB 0  
PC 1.40

exp303.1fr48-80

"130a"

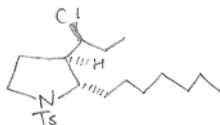

143.86  
135.01  
130.01  
127.86

62.21  
61.22  
56.77  
51.14  
47.86  
43.87  
37.40  
37.41  
36.44  
36.45  
30.01  
29.91  
29.44  
29.45  
28.28  
28.29  
26.60  
26.61  
21.97  
21.98  
14.52  
14.53  
11.01

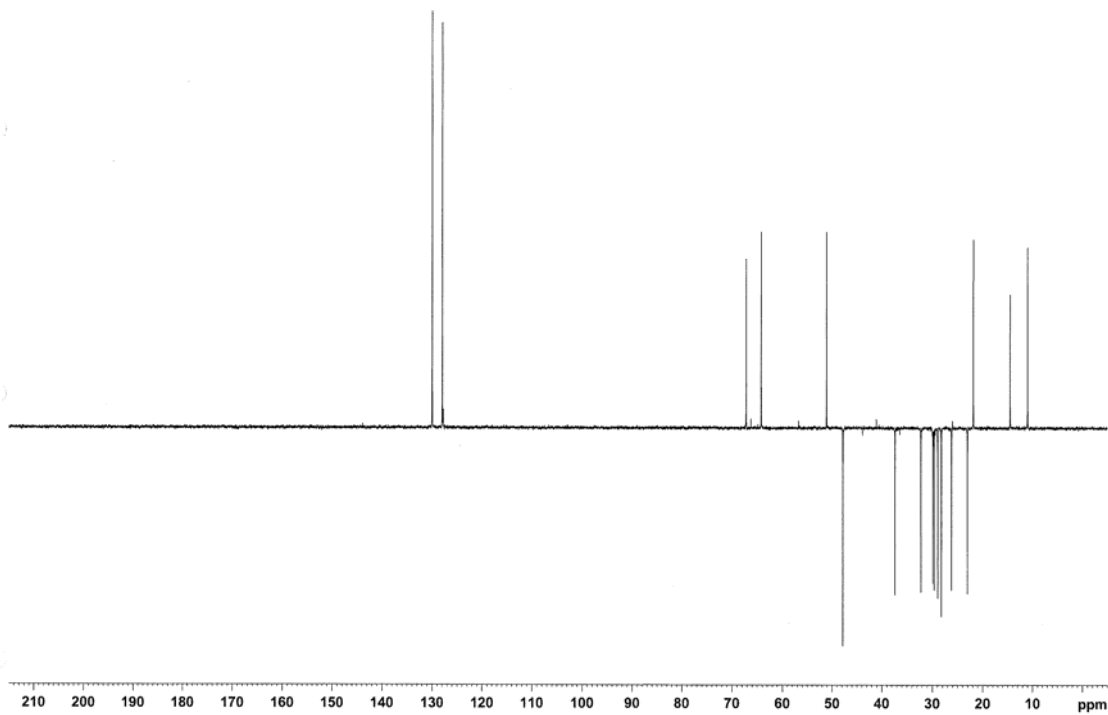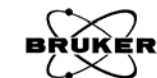

Current Data Parameters  
NAME exp303.1fr48-80  
EXPNO 12  
PROCNO 1

F2 - Acquisition Parameters  
Date\_ 20070608  
Time 19.21  
INSTRUM spect  
PROBHD 5 mm QNP 1H/13  
PULPROG dept135  
TD 65536  
SOLVENT CDCl3  
NS 256  
DS 4  
SWH 17985.611 Hz  
FIDRES 0.274439 Hz  
AQ 1.8219508 sec  
RG 16384  
DW 27.800 usec  
DE 6.00 usec  
TE 294.2 K  
CNST2 145.0000000  
D1 2.0000000 sec  
d2 0.00344828 sec  
d12 0.00002000 sec  
DELTA 0.00001019 sec  
MCREST 0.0000000 sec  
MCWRK 0.0150000 sec

----- CHANNEL f1 -----  
NUC1 13C  
P1 8.00 usec  
P2 16.00 usec  
PL1 0.00 dB  
SFO1 75.4752953 MHz

----- CHANNEL f2 -----  
CDDPRG2 waltz16  
NUC2 1H  
P3 8.00 usec  
P4 16.00 usec  
PCPD2 100.00 usec  
PL2 0.00 dB  
PL12 23.00 dB  
SFO2 300.1312005 MHz

F2 - Processing parameters  
SI 32768  
SF 75.4677190 MHz  
WDW EM  
SSB 0  
LB 1.00 Hz  
GB 0  
PC 1.40

**(2R,3R,4S)-4-Chloro-3-ethyl-2-phenethyl-1-tosylpiperidine/(2S,3S,4R)-4-Chloro-3-ethyl-2-phenethyl-1-tosylpiperidine (28b)** , **(2S,3R)-3-((S)-1-Chloropropyl)-2-phenethyl-1-tosylpyrrolidine** and **(2R,3S)-3-((R)-1-Chloropropyl)-2-phenethyl-1-tosylpyrrolidine (29b)**

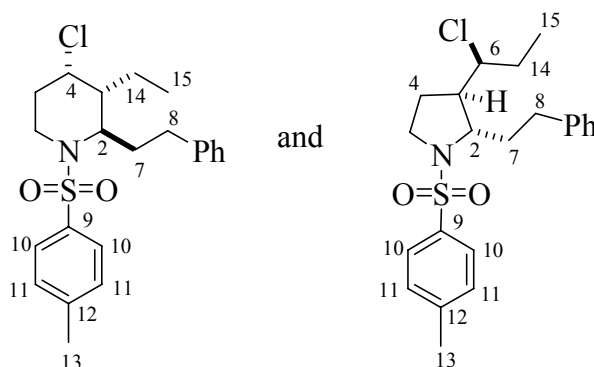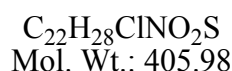

Following the general procedure, (*Z*)-*N*-(hex-3-enyl)-4-methylbenzenesulfonamide (500 mg, 1.97 mmol), in the presence of 3-phenylpropanal (398 mg, 2.96 mmol), was consumed based on analysis by TLC after 17 hours of stirring at room temperature. The work up afforded a pale yellow oil, which was purified by flash column chromatography (90% hexane, 10% ethyl acetate) to give the two *title compounds*.

**(2R,3R,4S)-4-Chloro-3-ethyl-2-phenethyl-1-tosylpiperidine/(2S,3S,4R)-4-Chloro-3-ethyl-2-phenethyl-1-tosylpiperidine (28b)**

328 mg (0.81 mmol, 41%) as a white solid. M.p. 95-97 °C;  $\nu_{\text{max}}(\text{neat})/\text{cm}^{-1}$  3032, 1941, 1598;  $\delta_{\text{H}}$  (300 MHz;  $\text{CDCl}_3$ ) 7.58 (2H, d,  $J$  8.3, H-C10), 7.29-7.11 (5H, m, Ar-H), 7.04 (2H, d,  $J$  8.3, H-C11), 4.35-4.25 (1H, m, H-C4), 4.11-4.04 (1H, m, H-C2), 3.81-3.70 (1H, m, H-C6), 2.99-2.85 (1H, m, H-C6), 2.64-2.39 (2H, m, H-C8), 2.37 (3H, s, H-C13), 1.88-1.73 (2H, m, H-C5), 1.73-1.62 (1H, m, H-C3), 1.73-1.50 (2H, m, H-C7), 1.30-1.11 (1H, m, H-C14), 0.84 (3H, t,  $J$  7.3, H-C15);  $\delta_{\text{C}}$  (75.5 MHz;  $\text{CDCl}_3$ ) 143.2 (C12), 140.6 (ArC), 137.9 (C9), 129.6 (C11), 128.4 (ArC), 128.3 (ArC), 126.8 (C10), 126.1 (ArC), 57.9 (C4), 55.2 (C2), 44.8 (C3), 40.7 (C6), 33.0 (C8), 31.2 (C5 or C7), 30.9 (C7 or C5), 21.4 (C13), 17.4 (C14), 12.2 (C15);  $m/z$  (CI) 406 ( $\text{MH}^+$ , 20), 216 (90), 111 (100); HRMS (ES) Found  $[\text{M}+\text{H}]^+$  406.1606,  $\text{C}_{22}\text{H}_{29}\text{ClNO}_2\text{S}$  requires 406.1602.

Crystal data.  $\text{C}_{22}\text{H}_{28}\text{ClNO}_2\text{S}$ ;  $M = 405.96$ ; Monoclinic;  $a = 8.9411(3)$  Å,  $b = 11.0719(3)$  Å,  $c = 10.9373(4)$  Å; Volume 1066.91(6) Å<sup>3</sup>;  $T = 120$  K;  $Z$  2, 13213 reflections measured, 4663 unique [ $R_{\text{int}} = 0.0367$ ]. The final  $R$  values  $RI = 0.0404$ ,  $wR2 = 0.1043$  (observed) and  $RI = 0.0470$ ,  $wR2 = 0.1078$  (all data). Flack parameter 0.44(6).

exp303.3fr31-

"129b"

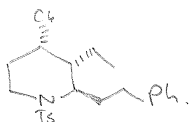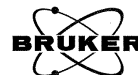

Current Data Parameters  
 NAME exp303.3fr31-  
 EXPNO 10  
 PROCNO 1

F2 - Acquisition Parameters  
 Date\_ 20071010  
 Time 10.50  
 INSTRUM spect  
 PROBHD 5 mm QNP 1H/13  
 PULPROG zg30  
 TD 65536  
 SOLVENT CDCl<sub>3</sub>  
 NS 16  
 DS 2  
 SWH 6172.839 Hz  
 FIDRES 0.094190 Hz  
 AQ 5.308460 sec  
 RG 80.6  
 DW 81.000 usec  
 DE 6.00 usec  
 TE 294.1 K  
 D1 1.0000000 sec  
 MCREST 0.0000000 sec  
 NCVRK 0.0150000 sec

===== CHANNEL f1 =====  
 NUC1 1H  
 P1 9.00 usec  
 PL1 0.00 dB  
 SFO1 300.1318534 MHz

F2 - Processing parameters  
 SI 32768  
 SF 300.1300353 MHz  
 WDW EM  
 SSB 0  
 LB 0.30 Hz  
 GB 0  
 PC 1.00

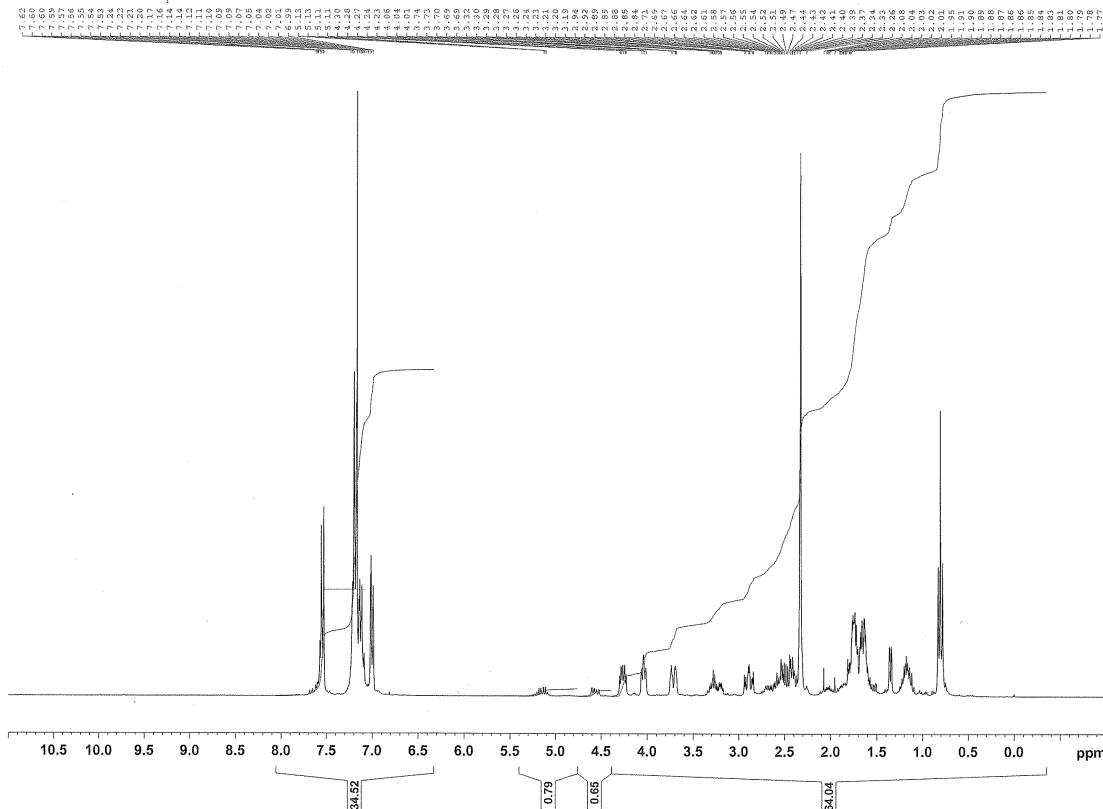

exp303.3fr31-54

"129b"

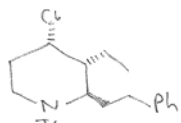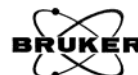

Current Data Parameters  
 NAME exp303.3fr31-54  
 EXPNO 11  
 PROCNO 1

F2 - Acquisition Parameters  
 Date\_ 20070606  
 Time 19.14  
 INSTRUM spect  
 PROBHD 5 mm QNP 1H/13  
 PULPROG zgpg30  
 TD 65536  
 SOLVENT CDCl<sub>3</sub>  
 NS 1024  
 DS 4  
 SWH 17985.611 Hz  
 FIDRES 0.274439 Hz  
 AQ 1.8219508 sec  
 RG 1448.2  
 DW 27.800 usec  
 DE 6.00 usec  
 TE 293.9 K  
 D1 2.0000000 sec  
 d11 0.0300000 sec  
 DELTA 1.89999999 sec  
 MCREST 0.0000000 sec  
 NCVRK 0.0150000 sec

===== CHANNEL f1 =====  
 NUC1 13C  
 P1 8.00 usec  
 PL1 0.00 dB  
 SFO1 75.4752953 MHz

===== CHANNEL f2 =====  
 CDDPRG2 waltz16  
 NUC2 1H  
 PCPD2 100.00 usec  
 PL2 0.00 dB  
 PL12 23.00 dB  
 PL13 24.00 dB  
 SFO2 300.1312005 MHz

F2 - Processing parameters  
 SI 32768  
 SF 75.4677190 MHz  
 WDW EM  
 SSB 0  
 LB 1.00 Hz  
 GB 0  
 PC 1.40

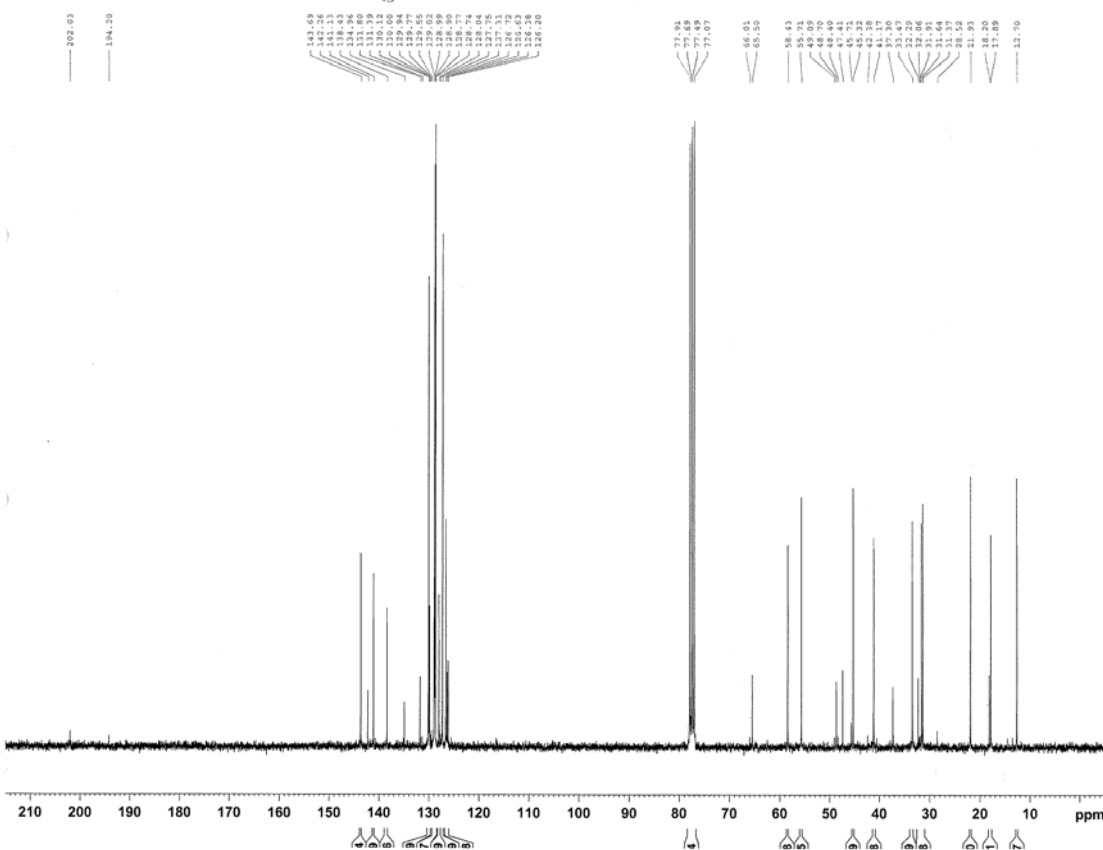

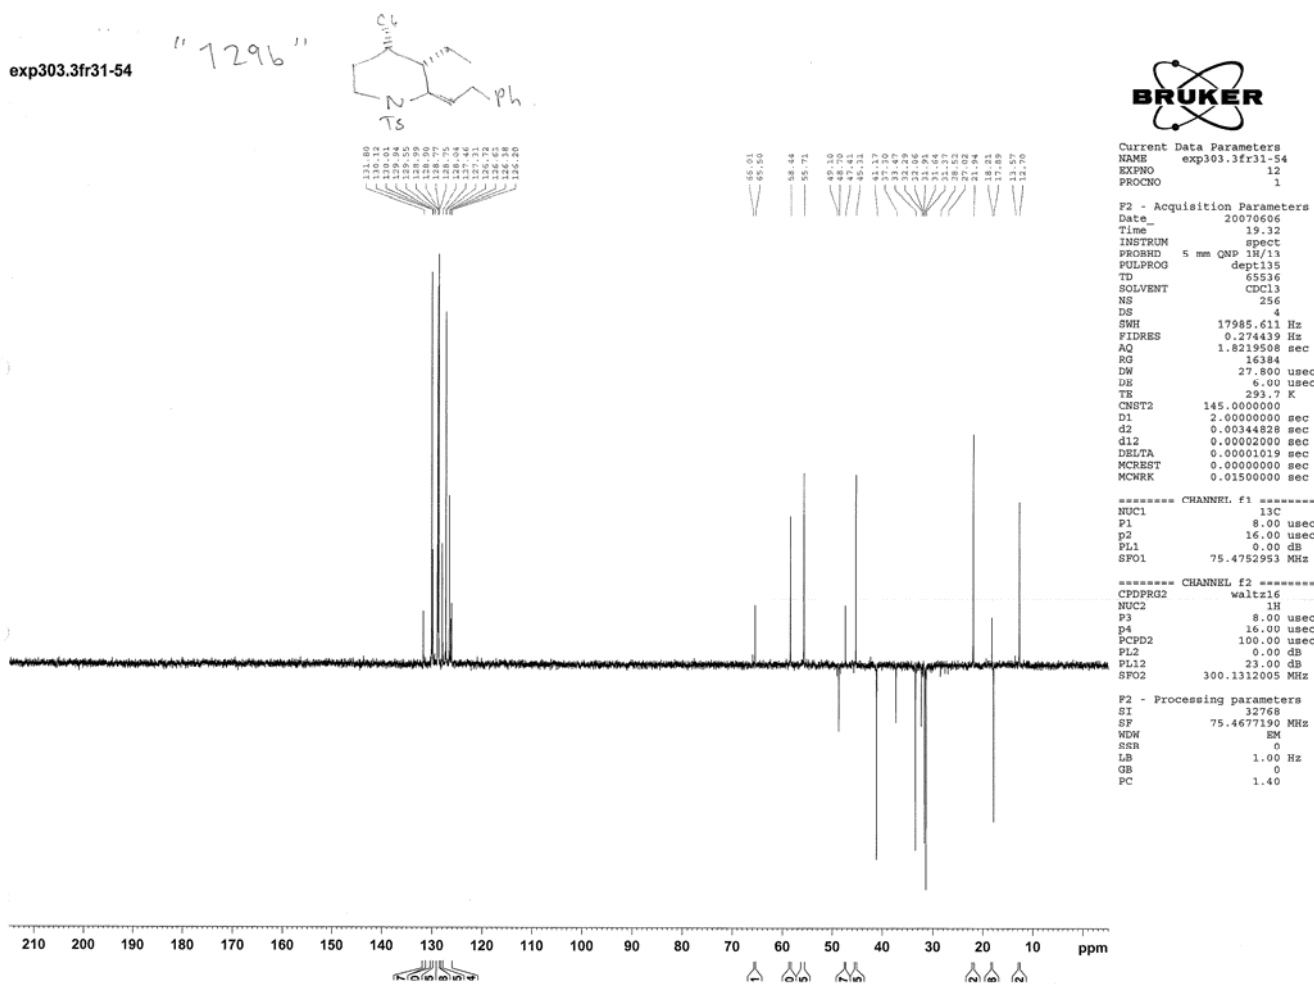

**(2*S*,3*R*)-3-((*S*)-1-Chloropropyl)-2-phenethyl-1-tosylpyrrolidine and (2*R*,3*S*)-3-((*R*)-1-Chloropropyl)-2-phenethyl-1-tosylpyrrolidine (29b)**

Further elution (90% hexane 10% ethyl acetate) provided the other *title compound* (392 mg, 0.97 mmol, 49%) as a white solid. M.p. 69-71 °C;  $\nu_{\max}$ (neat)/cm<sup>-1</sup> 3088, 2936, 1598;  $\delta_{\text{H}}$  (300 MHz; CDCl<sub>3</sub>) 7.75 (2H, d, *J* 8.3, H-C10), 7.35-7.16 (5H, m, Ar-H), 7.23 (2H, d, *J* 8.3, H-C11), 3.89 (1H, dt, *J* 6.2, 3.1, H-C2), 3.45-3.30 (2H, m, H-C5), 2.84 (1H, dt, *J* 9.1, 2.9, H-C6), 2.80-2.71 (2H, m, H-C8), 2.43 (3H, s, H-C13), 2.24-2.14 (1H, m, H-C3), 2.09-1.84 (2H, m, H-C7), 1.97-1.85 (1H, m, H-C4), 1.59-1.44 (1H, m, H-C14), 1.44-1.29 (2H, m, H-C14 and H-C4), 0.85 (3H, t, *J* 7.2, H-C15);  $\delta_{\text{C}}$  (75.5 MHz; CDCl<sub>3</sub>) 143.6 (C12), 141.7 (ArC), 135.0 (C9), 129.6 (C11), 128.4 (ArC), 128.3 (ArC), 127.6 (C10), 125.8 (ArC), 66.7 (C6), 63.6 (C2), 51.2 (C3), 47.7 (C5), 38.6 (C7), 32.2 (C8), 28.6 (C14), 28.0 (C4), 21.5 (C13), 10.6 (C15); *m/z* (CI) 406 (MH<sup>+</sup>, 92), 252 (52), 216 (100); HRMS (ES) Found [M+H]<sup>+</sup> 406.1602, C<sub>22</sub>H<sub>29</sub>ClNO<sub>2</sub>S requires 406.1606.

Crystal Data. C<sub>22</sub>H<sub>28</sub>ClNO<sub>2</sub>S; M = 405.96; Orthorhombic; *a* = 14.7643(7) Å, *b* = 13.3490(6) Å, *c* = 10.3953(3) Å; Volume 2048.80(15) Å<sup>3</sup>; Space group *Pna*2<sub>1</sub>; T = 120 K; Z 4, 16800 reflections measured, 4515 unique [*R*<sub>int</sub> = 0.0836]. The final R values *RI* = 0.0504, *wR2* = 0.1017 (observed) and *RI* = 0.0832, *wR2* = 0.1143 (all data). Flack parameter 0.10(8).

exp303.3fr80+

"130b"

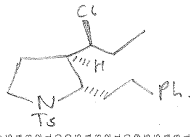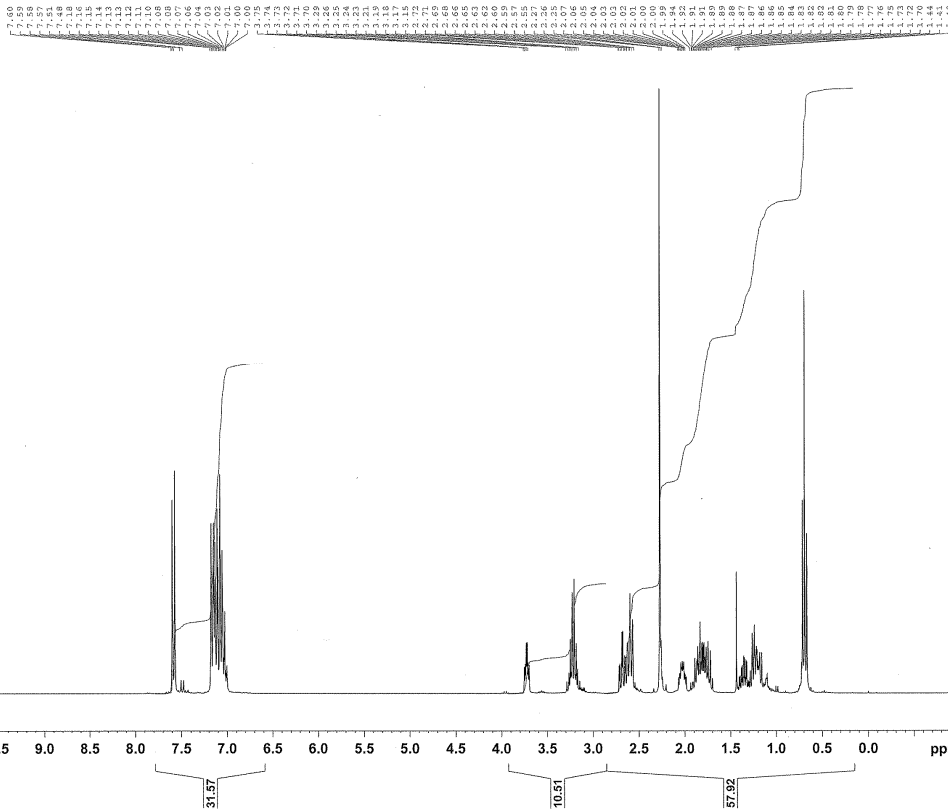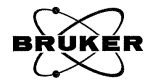

Current Data Parameters  
 NAME exp303.3fr80+  
 EXPNO 10  
 PROCNO 1

F2 - Acquisition Parameters  
 Date\_ 20070606  
 Time 17.49  
 INSTRUM spect  
 PROBHD 5 mm QNP 1H/13  
 PULPROG zgpg30  
 TD 65536  
 SOLVENT CDCl3  
 NS 16  
 DS 2  
 SWH 6172.839 Hz  
 FIDRES 0.094190 Hz  
 AQ 5.3084650 sec  
 RG 203.2  
 DW 81.000 usec  
 DE 6.00 usec  
 TE 293.7 K  
 D1 1.0000000 sec  
 MCREST 0.0000000 sec  
 MCWRK 0.0150000 sec

===== CHANNEL f1 =====  
 NUC1 1H  
 P1 9.00 usec  
 PL1 0.00 dB  
 SFO1 300.1318534 MHz

F2 - Processing parameters  
 SI 32768  
 SF 300.1300548 MHz  
 WDW EM  
 SSB 0  
 LB 0.30 Hz  
 GB 0  
 PC 1.00

exp303.3fr80+

"130b"

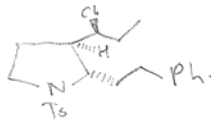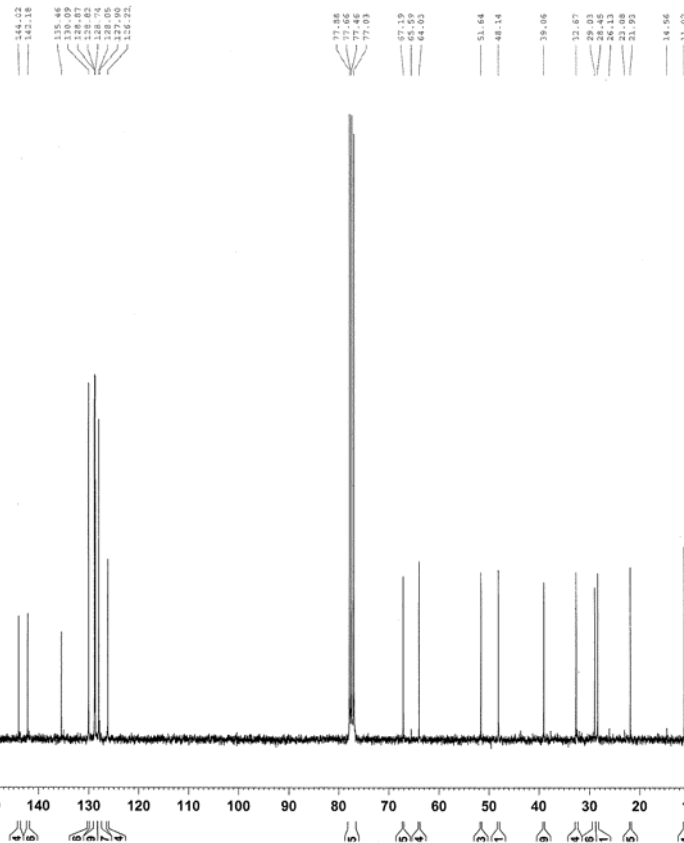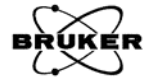

Current Data Parameters  
 NAME exp303.3fr80+  
 EXPNO 11  
 PROCNO 1

F2 - Acquisition Parameters  
 Date\_ 20070607  
 Time 19.08  
 INSTRUM spect  
 PROBHD 5 mm QNP 1H/13  
 PULPROG zgpg30  
 TD 65536  
 SOLVENT CDCl3  
 NS 1024  
 DS 4  
 SWH 17985.611 Hz  
 FIDRES 0.274439 Hz  
 AQ 1.8219508 sec  
 RG 1448.2  
 DW 27.800 usec  
 DE 6.00 usec  
 TE 293.8 K  
 D1 2.0000000 sec  
 d11 0.0300000 sec  
 DELTA 1.8999999 sec  
 MCREST 0.0000000 sec  
 MCWRK 0.0150000 sec

===== CHANNEL f1 =====  
 NUC1 13C  
 P1 8.00 usec  
 PL1 0.00 dB  
 SFO1 75.4752953 MHz

===== CHANNEL f2 =====  
 CPDPRG2 waltz16  
 NUC2 1H  
 PCPD2 100.00 usec  
 PL2 0.00 dB  
 PL12 23.00 dB  
 PL13 24.00 dB  
 SFO2 300.1312005 MHz

F2 - Processing parameters  
 SI 32768  
 SF 75.4677190 MHz  
 WDW EM  
 SSB 0  
 LB 1.00 Hz  
 GB 0  
 PC 1.40

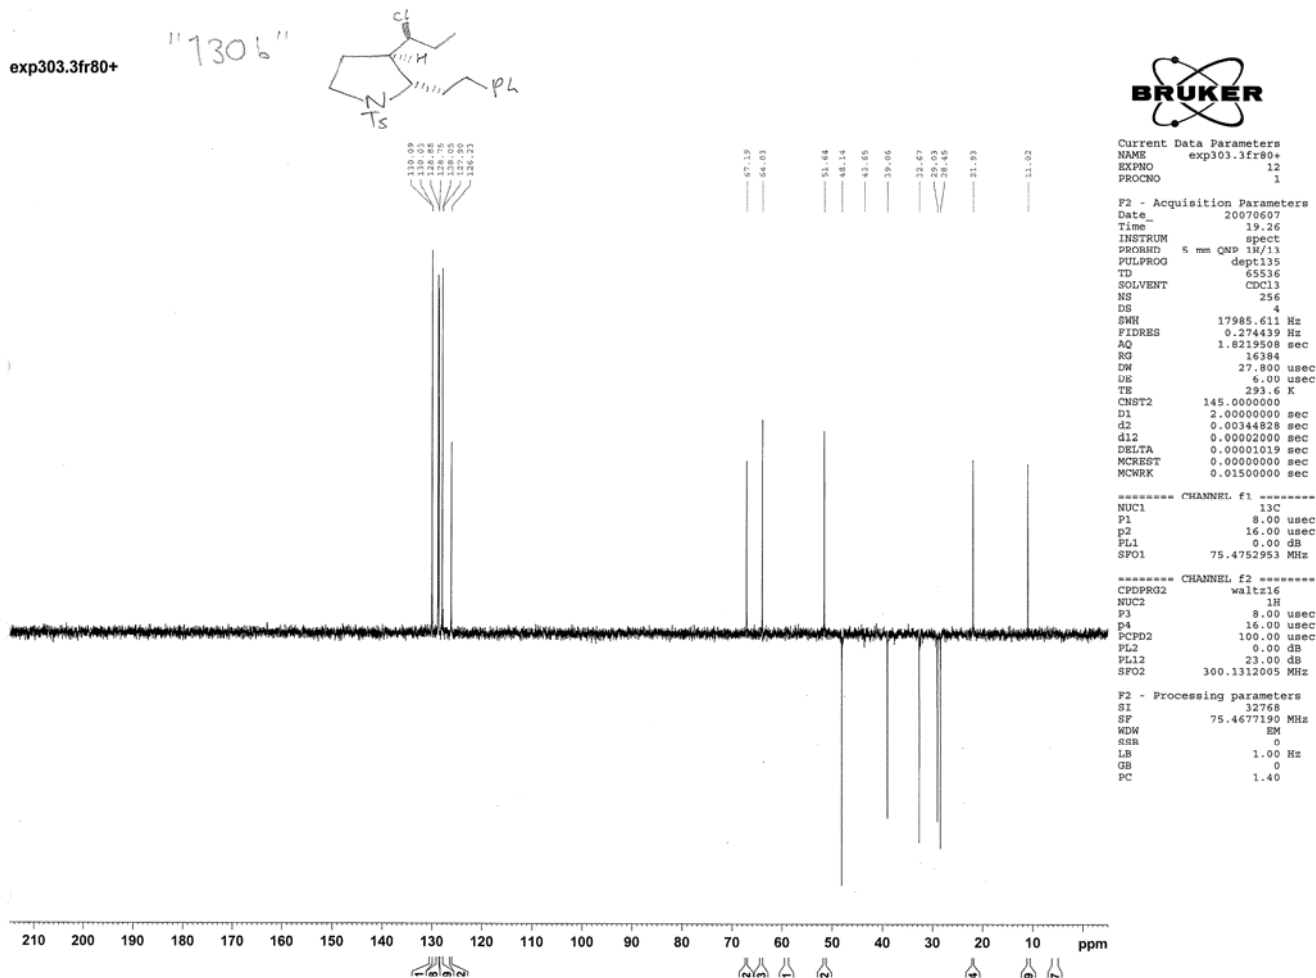

(2*R*,3*R*,4*S*)-4-chloro-2-cyclohexyl-3-ethyl-1-tosylpiperidine/(2*S*,3*S*,4*R*)-4-chloro-2-cyclohexyl-3-ethyl-1-tosylpiperidine (28c), (2*S*,3*R*)-3-((*S*)-1-chloropropyl)-2-cyclohexyl-1-tosylpyrrolidine/(2*R*,3*S*)-3-((*R*)-1-chloropropyl)-2-cyclohexyl-1-tosylpyrrolidine (29c) and (2*S*,3*S*,*E*)-2-cyclohexyl-3-(prop-1-enyl)-1-tosylpyrrolidine/(2*S*,3*S*,*E*)-2-cyclohexyl-3-(prop-1-enyl)-1-tosylpyrrolidine (30c).

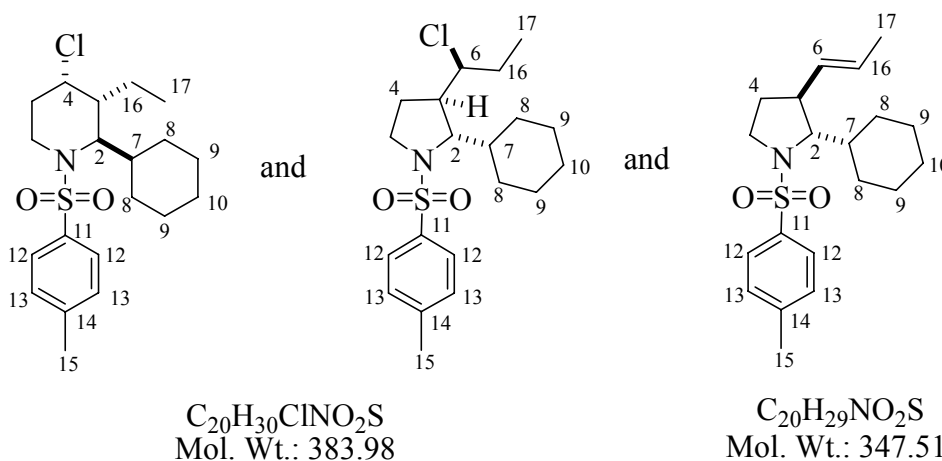

Following the general procedure, (*Z*)-*N*-(hex-3-enyl)-4-methylbenzenesulfonamide (500 mg, 1.97 mmol), in the presence of cyclohexanecarbaldehyde (332 mg, 2.96 mmol), was consumed based on analysis by TLC after 72 hours of stirring at room temperature. The work up afforded a yellow oil, which was purified by flash column chromatography (90% hexane, 10% ethyl acetate) to give the three *title compounds*.

(2*R*,3*R*,4*S*)-4-chloro-2-cyclohexyl-3-ethyl-1-tosylpiperidine/(2*S*,3*S*,4*R*)-4-chloro-2-cyclohexyl-3-ethyl-1-tosylpiperidine (28c)

182 mg (0.47 mmol, 24%) as a white solid. M.p. 151-153°C (mixture);  $\nu_{\max}(\text{neat})/\text{cm}^{-1}$  3035, 2928, 1815 (mixture);  $\delta_{\text{H}}$  (300 MHz;  $\text{CDCl}_3$ ) 7.68 (2H, d,  $J$  8.3, H-C12), 7.27 (2H, d,  $J$  8.3, H-C13), 4.37-4.28 (1H, m, H-C4), 3.84 (1H, d,  $J$  10.5, H-C2), 3.76-3.65 (1H, m, H-C6), 2.99-2.85 (1H, m, H-C6), 2.42 (3H, s, H-C15), 1.94-1.84 (1H, m, H-C3), 1.85-1.51 (5H, m, H-C7 and H-C8), 1.75-1.54 (2H, m, H-C5), 1.29-0.88 (6H, m, H-C9 and H-C10), 1.09-0.82 (2H, m, H-C16), 0.97-0.92 (3H, m, H-C17);  $\delta_{\text{C}}$  (75.5 MHz;  $\text{CDCl}_3$ ) 142.9 (C14), 138.4 (C11), 129.4 (C13), 126.9 (C12), 61.4 (C2), 58.5 (C4), 43.8 (C3), 41.1 (C6), 35.9 (C7), 31.0 (C8), 30.4 (C8), 28.3 (C5), 26.5 (C10), 26.4 (C9), 26.2 (C9), 21.5 (C15), 17.2 (C16), 12.2 (C17);  $m/z$  (CI) 384 ( $\text{MH}^+$ , 100), 348 (78), 300 (22); Anal. Calcd. for  $\text{C}_{20}\text{H}_{30}\text{ClNO}_2\text{S}$  requires C, 62.56; H, 7.88; N, 3.65%. Found: C, 62.66; H, 8.01; N, 3.69%.

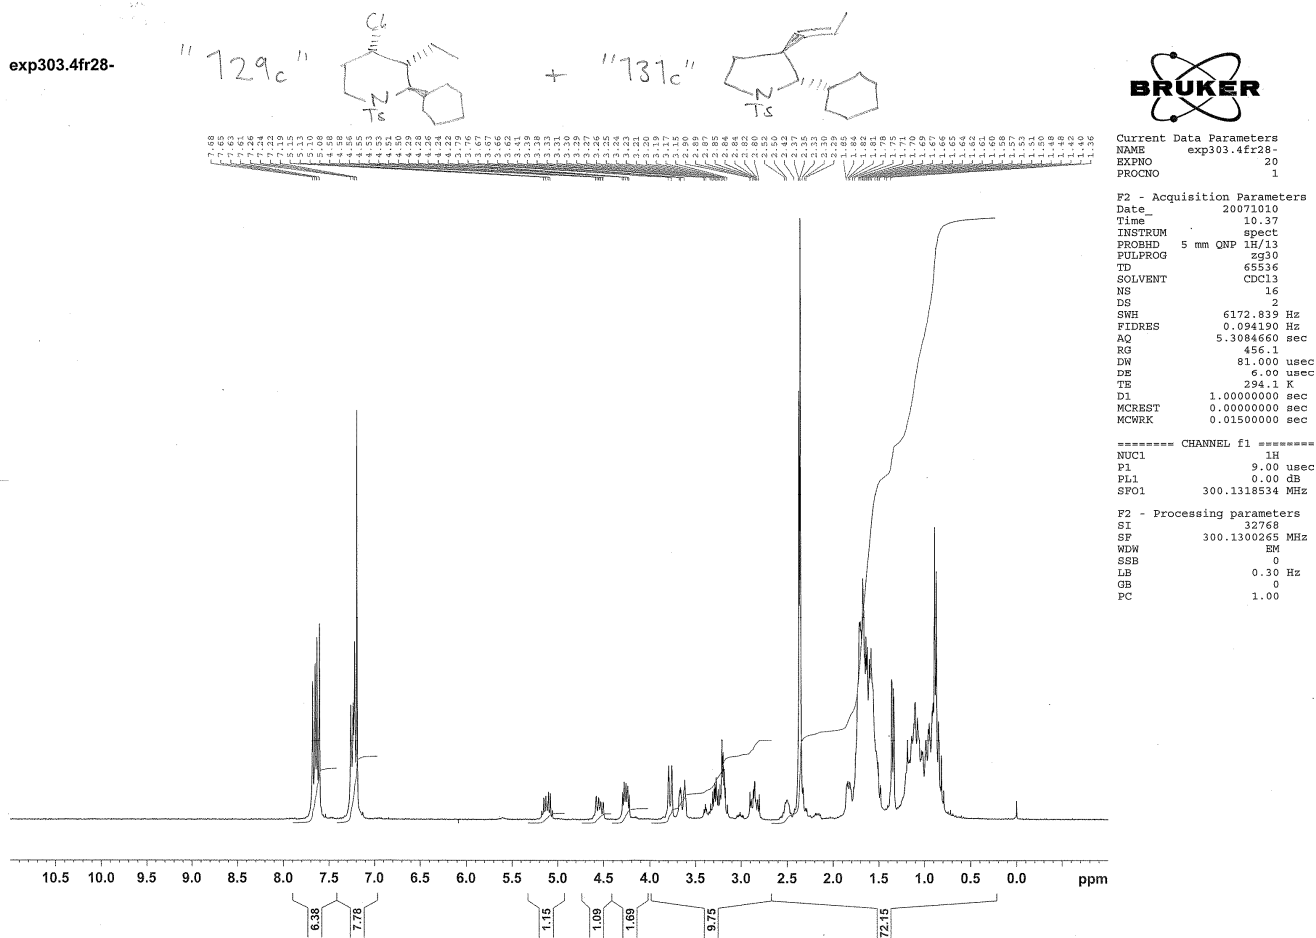



exp303.4fr28-40

"129c"

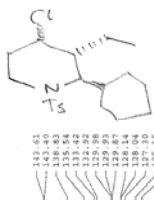

+ "137c"

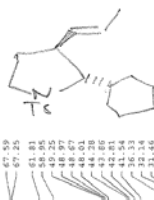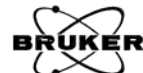

Current Data Parameters  
 NAME exp303.4fr28-40rep  
 EXPNO 1  
 PROCNO 1

F2 - Acquisition Parameters  
 Date\_ 20070717  
 Time 19.48  
 INSTRUM spect  
 PROBHD 5 mm QNP 1H/13  
 PULPROG zgpg30  
 TD 65536  
 SOLVENT CDCl3  
 NS 1024  
 DS 4  
 SWH 17985.611 Hz  
 FIDRES 0.274439 Hz  
 AQ 1.8219508 sec  
 RG 912.3  
 DW 27.800 usec  
 DE 6.00 usec  
 TE 294.4 K  
 D1 2.0000000 sec  
 d11 0.0300000 sec  
 DELTA 1.8999998 sec  
 MCREST 0.0000000 sec  
 MCWRR 0.0150000 sec

----- CHANNEL f1 -----  
 NUC1 13C  
 P1 8.00 usec  
 PL1 0.00 dB  
 SFO1 75.4752953 MHz

----- CHANNEL f2 -----  
 CPDPRG2 waltz16  
 NUC2 1H  
 PCPD2 100.00 usec  
 PL2 0.00 dB  
 PL12 23.00 dB  
 PL13 24.00 dB  
 SFO2 300.1312005 MHz

F2 - Processing parameters  
 SI 32768  
 SF 75.4677190 MHz  
 WDW EM  
 SSB 0  
 LB 1.00 Hz  
 GB 0  
 PC 1.40

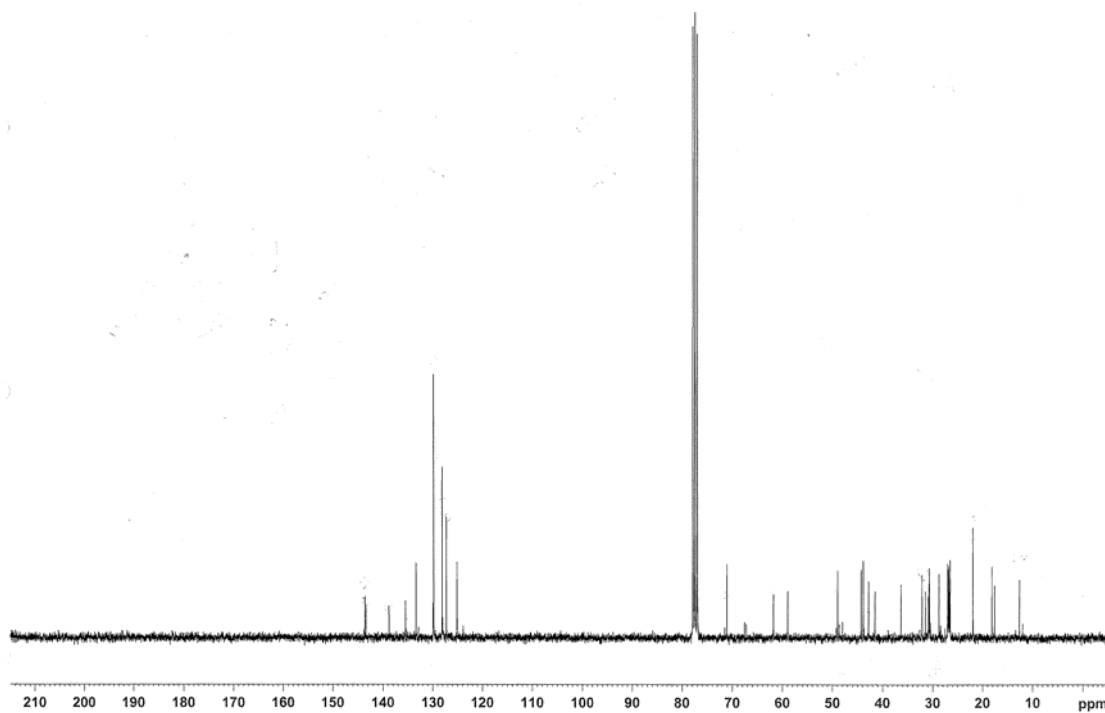

exp303.4fr28-40

"129c"

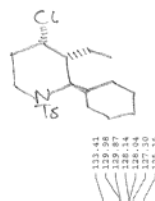

+ "137c"

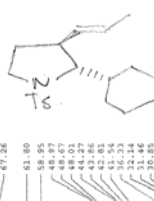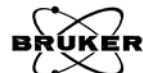

Current Data Parameters  
 NAME exp303.4fr28-40rep  
 EXPNO 12  
 PROCNO 1

F2 - Acquisition Parameters  
 Date\_ 20070717  
 Time 20.06  
 INSTRUM spect  
 PROBHD 5 mm QNP 1H/13  
 PULPROG dept135  
 TD 65536  
 SOLVENT CDCl3  
 NS 256  
 DS 4  
 SWH 17985.611 Hz  
 FIDRES 0.274439 Hz  
 AQ 1.8219508 sec  
 RG 16384  
 DW 27.800 usec  
 DE 6.00 usec  
 TE 294.1 K  
 CNST2 145.0000000 sec  
 D1 2.0000000 sec  
 d2 0.00344828 sec  
 d12 0.00002000 sec  
 DELTA 0.00001019 sec  
 MCREST 0.0000000 sec  
 MCWRR 0.0150000 sec

----- CHANNEL f1 -----  
 NUC1 13C  
 P1 8.00 usec  
 PL1 0.00 dB  
 SFO1 75.4752953 MHz

----- CHANNEL f2 -----  
 CPDPRG2 waltz16  
 NUC2 1H  
 P3 8.00 usec  
 P4 16.00 usec  
 PCPD2 100.00 usec  
 PL2 0.00 dB  
 PL12 23.00 dB  
 SFO2 300.1312005 MHz

F2 - Processing parameters  
 SI 32768  
 SF 75.4677190 MHz  
 WDW EM  
 SSB 0  
 LB 1.00 Hz  
 GB 0  
 PC 1.40

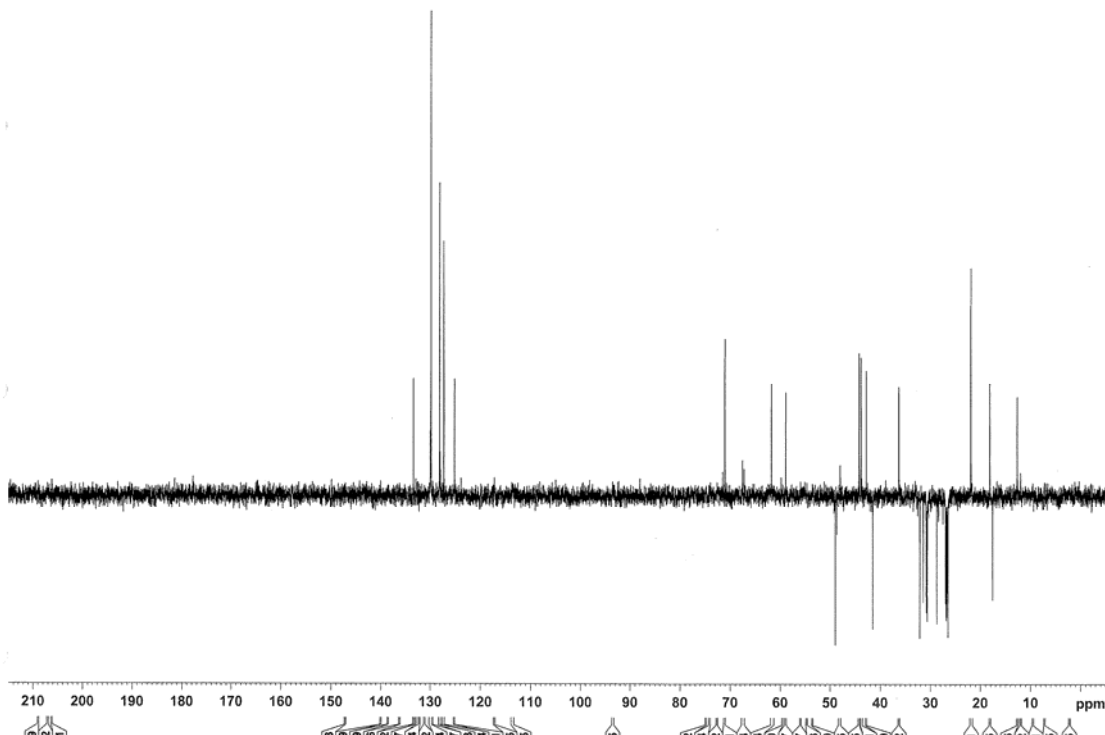

**(2*S*,3*S*,*E*)-2-cyclohexyl-3-(prop-1-enyl)-1-tosylpyrrolidine/(2*S*,3*S*,*E*)-2-cyclohexyl-3-(prop-1-enyl)-1-tosylpyrrolidine (30c; only partially separable from piperidine product)**

$\delta_{\text{H}}$  (300 MHz; CDCl<sub>3</sub>) 7.73 (2H, d, *J* 8.2, H-C12), 7.31 (2H, d, *J* 8.2, H-C13), 5.25-5.11 (1H, m, H-C16), 4.66-4.55 (1H, m, H-C6), 3.40-3.30 (1H, m, H-C5), 3.31-3.25 (1H, m, H-C5), 3.27-3.21 (1H, m, H-C2), 2.62-2.51 (1H, m, H-C3), 2.43 (3H, s, H-C15), 1.84-1.68 (5H, m, H-C7 and H-C8), 1.69-1.56 (2H, m, H-C4), 1.41 (3H, dd, *J* 6.4, 1.3, H-C17), 1.29-1.03 (6H, m, H-C9 and H-C10);  $\delta_{\text{C}}$  (75.5 MHz; CDCl<sub>3</sub>) 143.2 (C14), 135.1 (C6), 133.0 (C11), 129.5 (C13), 127.7 (C12), 124.7 (C16), 70.7 (C2), 48.5 (C5), 43.4 (C3), 42.0 (C7), 31.7 (C8), 30.2 (C8), 26.6 (C4), 26.4 (C10), 26.3 (C10), 26.1 (C9), 21.5 (C15), 17.7 (C17); *m/z* (CI) 348 (MH<sup>+</sup>, 100), 264 (10), 194 (35).

Crystal data. C<sub>20</sub>H<sub>29</sub>NO<sub>2</sub>S; *M* = 347.50; Monoclinic; *a* = 7.7257(2) Å, *b* = 21.1223(7) Å, *c* = 11.5315(2) Å; Volume 1869.09(9) Å<sup>3</sup>; Space group *P*21/*c*; *T* = 120 K; *Z* 4; 20906 reflections measured, 4239 unique [*R*<sub>int</sub> = 0.0585]. The final *R* values *RI* = 0.0678, *wR*2 = 0.1531 (observed) and *RI* = 0.0950, *wR*2 = 0.1737 (all data).

**(2*S*,3*R*)-3-((*S*)-1-chloropropyl)-2-cyclohexyl-1-tosylpyrrolidine/(2*R*,3*S*)-3-((*R*)-1-chloropropyl)-2-cyclohexyl-1-tosylpyrrolidine (29c)**

Further elution (90% hexane 10% ethyl acetate) provided the *title compound* (470 mg, 1.22 mmol, 62%) as a white solid. M.p. 102-103 °C;  $\nu_{\text{max}}$ (neat)/cm<sup>-1</sup> 3034, 2927, 1597;  $\delta_{\text{H}}$  (300 MHz; CDCl<sub>3</sub>) 7.75 (2H, d, *J* 8.3, H-C12), 7.31 (2H, d, *J* 8.3, H-C13), 3.70 (1H, dd, *J* 4.8, 2.3, H-C2), 3.40-3.20 (2H, m, H-C5), 2.67 (1H, dt, *J* 9.2, 2.6, H-C6), 2.42 (3H, s, H-C15), 2.29-2.19 (1H, m, H-C3), 1.96-1.82 (1H, m, H-C4), 1.83-1.71 (4H, m, H-C8), 1.71-1.60 (1H, m, H-C7), 1.54-1.37 (2H, m, H-C4 and H-C16), 1.37-1.24 (1H, m, H-C16), 1.28-0.96 (6H, m, H-C9 and H-C10), 0.81 (3H, t, *J* 7.2, H-C17);  $\delta_{\text{C}}$  (75.5 MHz; CDCl<sub>3</sub>) 143.4 (C14), 135.0 (C11), 129.5 (C13), 127.6 (C12), 68.4 (C2), 67.1 (C6), 48.1 (C3), 48.0 (C5), 43.4 (C7), 29.7 (C8), 28.9 (C8), 28.2 (C16), 27.9 (C4), 26.4 (C10), 26.3 (C9), 26.3 (C9), 21.4 (C15), 10.7 (C17); *m/z* (CI) 384 (MH<sup>+</sup>, 100), 348 (45), 300 (25); HRMS (ES) Found [M+NH<sub>4</sub>]<sup>+</sup> 401.2021, C<sub>20</sub>H<sub>34</sub>ClN<sub>2</sub>O<sub>2</sub>S requires 401.2024.

Crystal data. C<sub>20</sub>H<sub>30</sub>ClNO<sub>2</sub>S; *M* = 383.96; Orthorhombic; *a* = 13.0538(3) Å, *b* = 15.5288(3) Å, *c* = 19.1088(4) Å; Volume 3873.54(14) Å<sup>3</sup>; Space group *Pbca*; *T* = 120 K; *Z* 8, 31418 reflections measured, 4422 unique [*R*<sub>int</sub> = 0.0516]. The final *R* values *RI* = 0.0406, *wR*2 = 0.1017 (observed) and *RI* = 0.0550, *wR*2 = 0.1096 (all data).



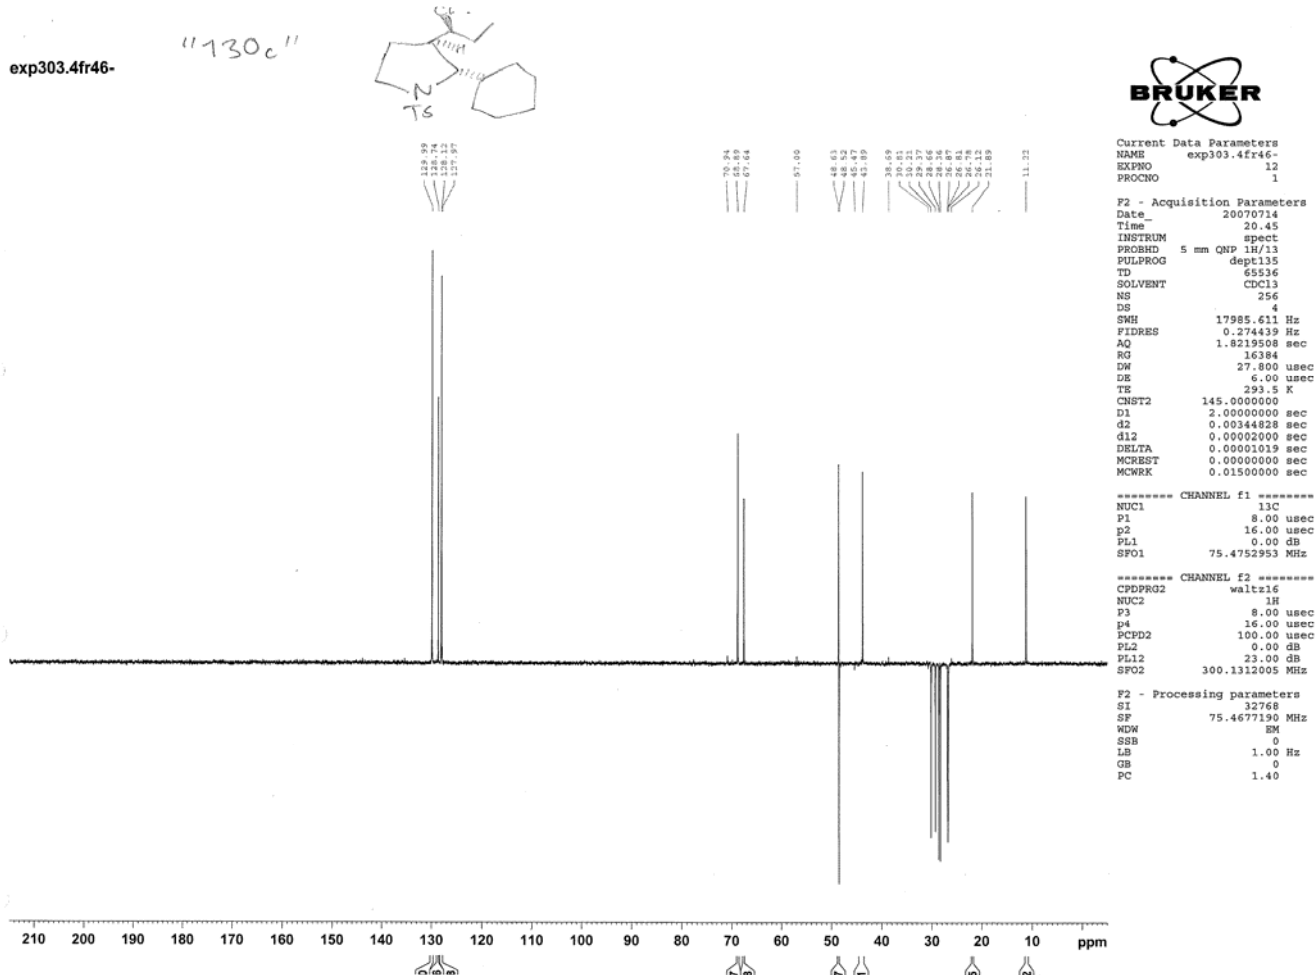

**(2R,3S,4S)-4-Chloro-2-heptyl-3-methyl-1-tosylpiperidine/(2S,3R,4R)-4-Chloro-2-heptyl-3-methyl-1-tosylpiperidine (31a)**

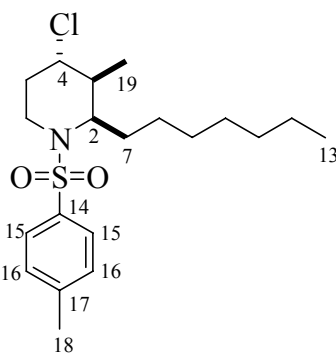

$C_{20}H_{32}ClNO_2S$   
 Mol. Wt.: 385.99

Following the general procedure, (*E*)-4-methyl-*N*-(pent-3-enyl)benzenesulfonamide (150 mg, 0.62 mmol), in the presence of octanal (120 mg, 0.94 mmol), was consumed based on analysis by TLC after 17 hours of stirring at room temperature. The work up afforded a yellow oil, which was purified by flash column chromatography (90% hexane, 10% ethyl acetate) to give the *title compound* (159 mg, 0.41 mmol, 66%) as a white solid.

M.p. 56-57 °C;  $\nu_{\max}$ (neat)/ $cm^{-1}$  2925, 1712, 1461;  $\delta_H$  (300 MHz;  $CDCl_3$ ) 7.69 (2H, d, *J* 8.4, H-C15), 7.27 (2H, d, *J* 8.4, H-C16), 3.98 (1H, td, *J* 9.7, 4.4, H-C2), 3.84-3.82 (1H, m, H-C4), 3.81-3.75 (1H, m, H-C6),

2.99 (1H, td, *J* 15.1, 2.7, H-C6), 2.40 (3H, s, H-C18), 2.03-1.93 (1H, m, H-C5), 1.83-1.69 (1H, m, H-C3), 1.67-1.50 (1H, m, H-C5), 1.47-1.34 (2H, m, H-C7), 1.33-1.10 (10H, m, H-C8 to H-C12), 1.01 (3H, d, *J* 6.9, H-C19), 0.86 (3H, t, *J* 6.8, H-C13);  $\delta_c$  (75.5 MHz; CDCl<sub>3</sub>) 143.1 (C17), 138.4 (C14), 129.7 (C16), 126.8 (C15), 60.6 (C4), 58.8 (C2), 42.1 (C3), 39.9 (C6), 35.9 (C5), 31.7 (C11), 29.2 (C9 and C10), 26.2 (C8), 24.4 (C7), 22.6 (C12), 21.4 (C18), 16.4 (C19), 14.0 (C13); *m/z* (CI) 386 (MH<sup>+</sup>, 100), 350 (42), 286 (40); HRMS (ES) Found [M+NH<sub>4</sub>]<sup>+</sup> 403.2176, C<sub>20</sub>H<sub>36</sub>ClN<sub>2</sub>O<sub>2</sub>S requires 403.2181.

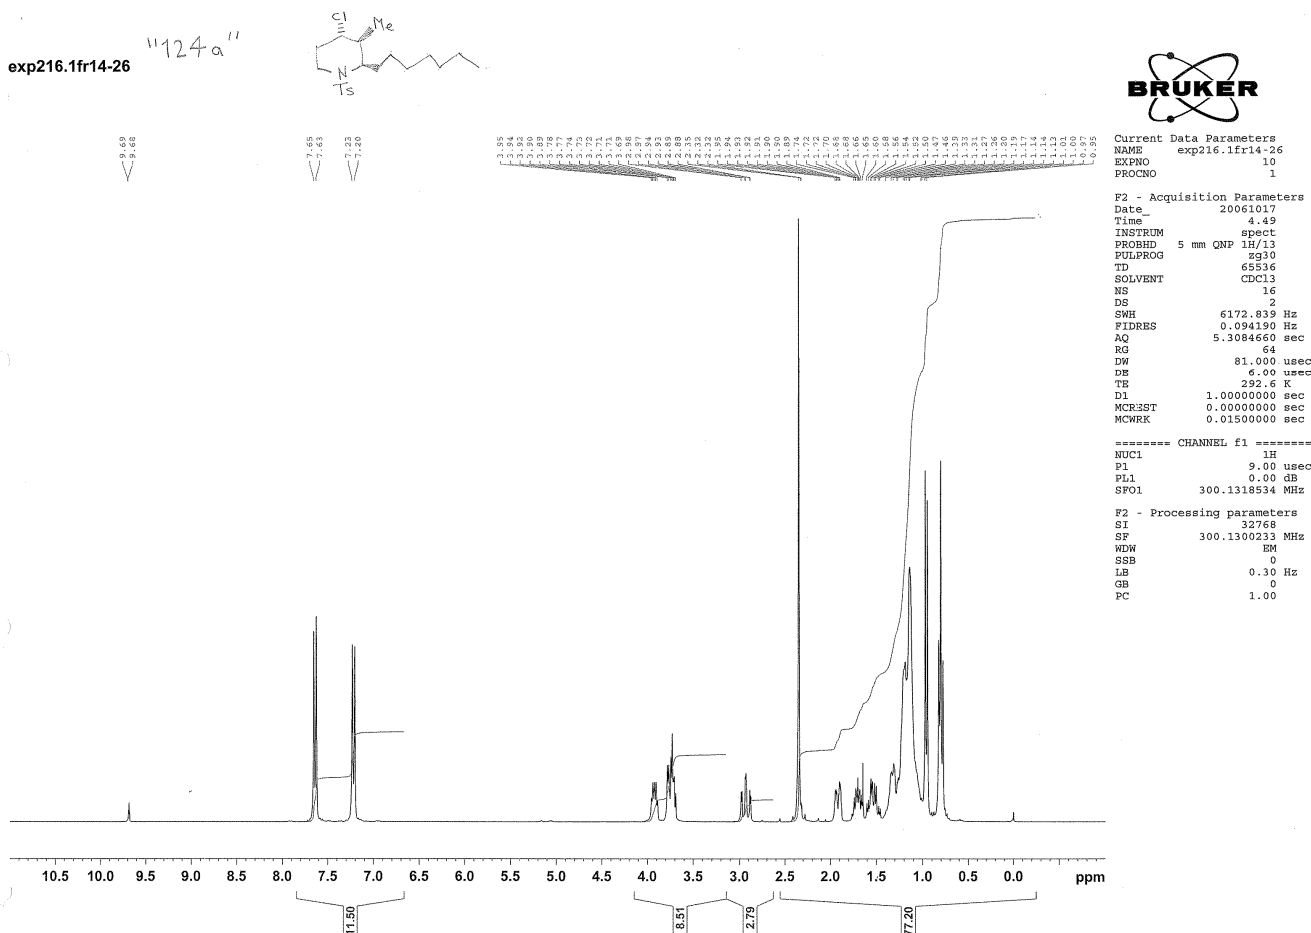



**(2*R*,3*S*,4*S*)-4-Chloro-3-methyl-2-phenethyl-1-tosylpiperidine/(2*S*,3*R*,4*R*)-4-Chloro-3-methyl-2-phenethyl-1-tosylpiperidine (31b)**

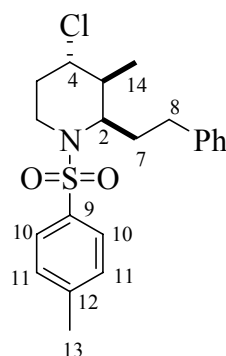

$C_{21}H_{26}ClNO_2S$   
Mol. Wt.: 391.95

Following the general procedure, (*E*)-4-methyl-*N*-(pent-3-enyl)benzenesulfonamide (150 mg, 0.62 mmol) in the presence of 3-phenylpropanal (126 mg, 0.94 mmol), was consumed based on analysis by TLC after 17 hours of stirring at room temperature. The work up afforded a yellow oil, which was purified by flash column chromatography (90% hexane, 10% ethyl acetate) to give the *title compound* (157 mg, 0.40 mmol, 64%) as a white solid.

M.p. 105-106 °C;  $\nu_{\max}$ (KBr)/ $cm^{-1}$  3030, 2955, 1596;  $\delta_H$  (300 MHz;  $CDCl_3$ ) 7.83 (2H, d, *J* 8.1, H-C10), 7.39 (2H, d, *J* 8.1, H-C11), 7.36-7.18 (5H, m, Ar-H), 4.26-4.15 (1H, m, H-C2), 3.97 (1H, dd, *J* 15.0, 4.9, H-C6), 3.85 (1H, dt, *J* 11.6, 4.5, H-C4), 3.25-3.11 (1H, m, H-C6), 2.79-2.66 (1H, m, H-C8), 2.65-2.52 (1H, m, H-C8), 2.51 (3H, s, H-C13), 2.13-2.00 (1H, m, H-C5), 1.95-1.71 (1H, m, H-C3), 1.87-1.63 (2H, m, H-C7), 1.74-1.56 (1H, m, H-C5), 1.09 (3H, d, *J* 6.8, H-C14);  $\delta_C$  (75.5 MHz;  $CDCl_3$ ) 143.4 (C12), 141.6 (ArC), 138.3 (C9), 129.9 (C11), 128.4 (ArC), 128.3 (ArC), 126.9 (C10), 125.9 (ArC), 60.4 (C4), 58.8 (C2), 41.9 (C3), 40.1 (C6), 35.7 (C5), 32.7 (C8), 26.9 (C7), 21.5 (C13), 16.4 (C14); *m/z* (CI) 392 ( $MH^+$ , 40), 238 (20), 202 (74); Anal. Calcd. for  $C_{21}H_{26}ClNO_2S$  requires C, 64.35; H, 7.08; N, 3.57%. Found: C, 64.15; H, 6.70; N, 3.50%; HRMS (ES) Found  $[M+H]^+$  392.1446,  $C_{21}H_{27}ClNO_2S$  requires 392.1444.

Crystal data.  $C_{21}H_{26}ClNO_2S$ ; *M* = 391.94; Monoclinic; *a* = 24.2931(8) Å, *b* = 11.7455(3) Å, *c* = 14.3281(4) Å; Volume 3937.7(2) Å<sup>3</sup>; Space group *C12/c1*; *T* = 120 K; *Z* 8; 22425 reflections measured, 4514 unique [*R*<sub>int</sub> = 0.0566]. The final *R* values *RI* = 0.0494, *wRI* = 0.1195 (observed) and *RI* = 0.0830, *wRI* = 0.1356 (all data).

exp216.2fr37-56

"124b"

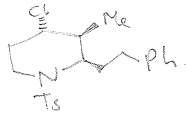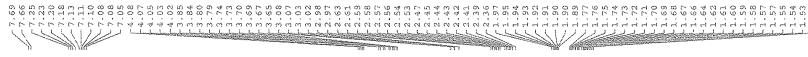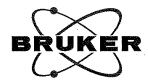

Current Data Parameters  
 NAME exp216.2fr37-56  
 EXPNO 21  
 PROCNO 1

F2 - Acquisition Parameters  
 Date\_ 20061010  
 Time 13.26  
 INSTRUM spect  
 PROBHD 5 mm QNP 1H/13  
 PULPROG zg30  
 TD 65536  
 SOLVENT CDCl3  
 NS 16  
 DS 2  
 SWH 6172.839 Hz  
 FIDRES 0.094190 Hz  
 AQ 5.3084650 sec  
 RG 128  
 DW 81.000 usec  
 DE 6.00 usec  
 TE 292.7 K  
 D1 1.00000000 sec  
 MCREST 0.00000000 sec  
 MCWRC 0.01500000 sec

===== CHANNEL f1 =====  
 NUC1 1H  
 P1 9.00 usec  
 PL1 0.00 dB  
 SFO1 300.1318534 MHz

F2 - Processing parameters  
 SI 32768  
 SF 300.1300321 MHz  
 WDW EM  
 SSB 0  
 LB 0.30 Hz  
 GB 0  
 PC 1.00

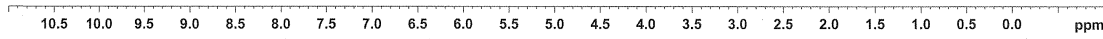

exp216.2fr37-56

"124b"

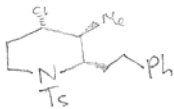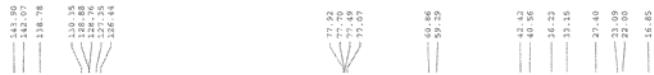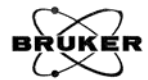

Current Data Parameters  
 NAME exp216.2fr37-56  
 EXPNO 21  
 PROCNO 1

F2 - Acquisition Parameters  
 Date\_ 20061010  
 Time 19.28  
 INSTRUM spect  
 PROBHD 5 mm QNP 1H/13  
 PULPROG zgpg30  
 TD 65536  
 SOLVENT CDCl3  
 NS 1024  
 DS 4  
 SWH 17985.611 Hz  
 FIDRES 0.274439 Hz  
 AQ 1.8219508 sec  
 RG 645.1  
 DW 27.800 usec  
 DE 6.00 usec  
 TE 293.1 K  
 D1 2.00000000 sec  
 d11 0.03000000 sec  
 DELTA 1.89999998 sec  
 MCREST 0.00000000 sec  
 MCWRC 0.01500000 sec

===== CHANNEL f1 =====  
 NUC1 13C  
 P1 8.00 usec  
 PL1 0.00 dB  
 SFO1 75.4752953 MHz

===== CHANNEL f2 =====  
 CPDPRG2 waltz16  
 NUC2 1H  
 PCPR2 100.00 usec  
 PL2 0.00 dB  
 PL12 23.00 dB  
 PL13 24.00 dB  
 SFO2 300.1312005 MHz

F2 - Processing parameters  
 SI 32768  
 SF 75.4677190 MHz  
 WDW EM  
 SSB 0  
 LB 1.00 Hz  
 GB 0  
 PC 1.40

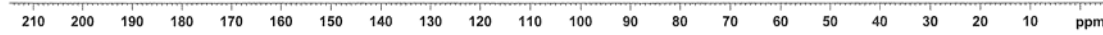



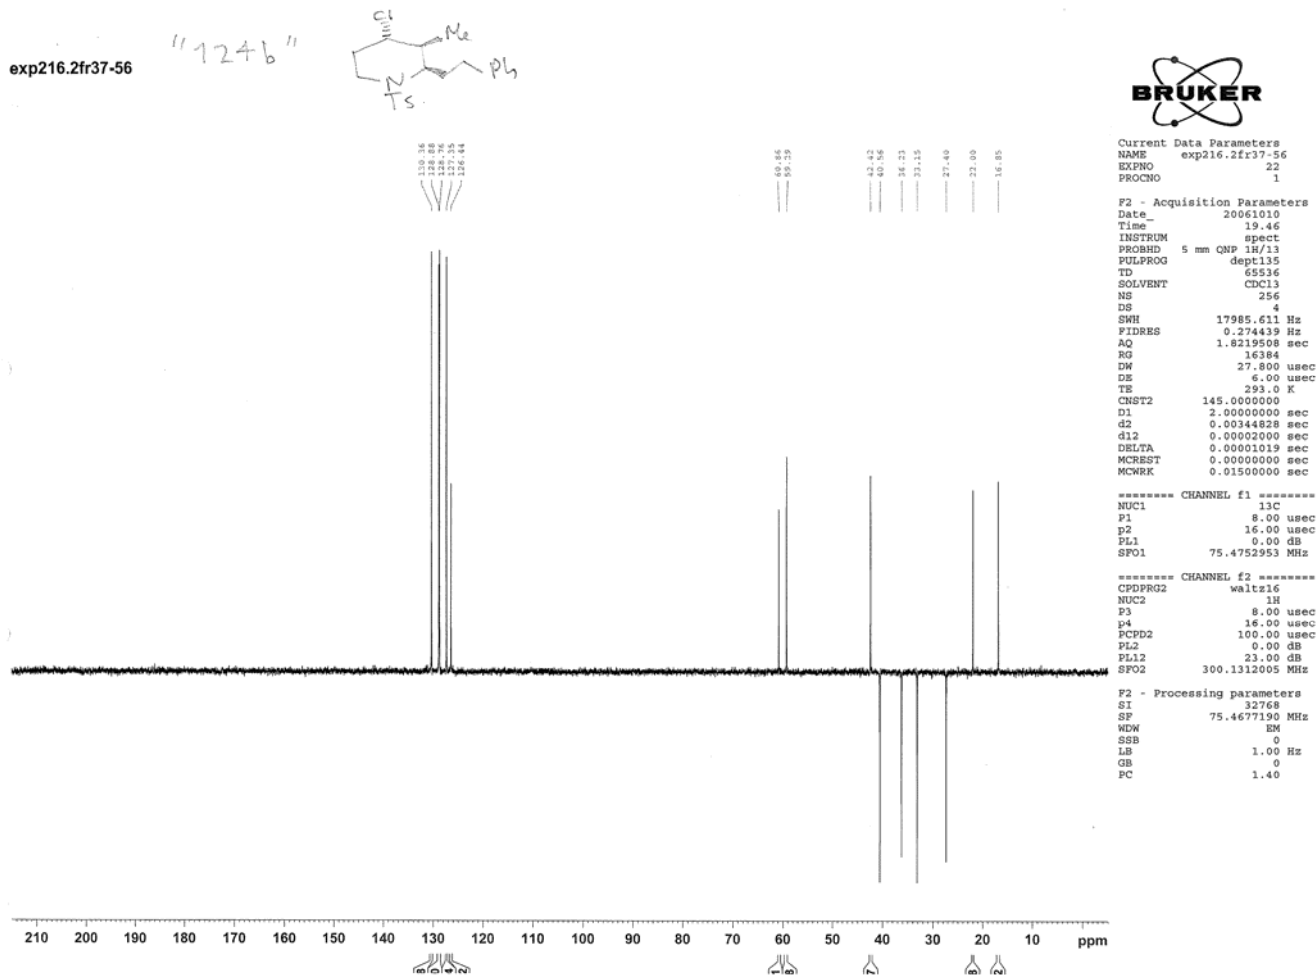

**(2*S*,3*R*)-3-((*S*)-1-Chloroethyl)-2-cyclohexyl-1-tosylpyrrolidine/(2*R*,3*S*)-3-((*R*)-1-Chloroethyl)-2-cyclohexyl-1-tosylpyrrolidine (32c)**

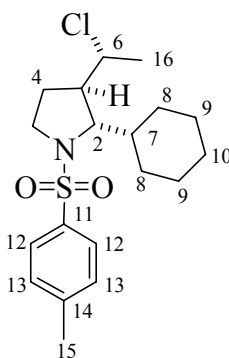

$C_{19}H_{28}ClNO_2S$   
 Mol. Wt.: 369.95

Following the general procedure, (*E*)-4-methyl-*N*-(pent-3-enyl)benzenesulfonamide (150 mg, 0.62 mmol) in the presence of cyclohexanecarbaldehyde (105 mg, 0.94 mmol), was consumed based on analysis by TLC after 240 hours of stirring at room temperature. The work up afforded a yellow oil, which was purified by flash column chromatography (90% hexane, 10% ethyl acetate) to give the *title compound* (162 mg, 0.44 mmol, 70%) as a white solid.

M.p. 116-118 °C;  $\nu_{\max}$ (neat)/ $cm^{-1}$  2927, 1669, 1599;  $\delta_H$  (300 MHz;  $CDCl_3$ ) 7.73 (2H, d, *J* 8.4, H-C12), 7.31 (2H, d, *J* 8.4, H-C13), 3.45-3.41 (1H, m, H-C2), 3.38-3.28 (3H, m, H-C6 and H-C5), 2.43 (3H, s, H-C15),

2.23-2.14 (1H, m, H-C3), 1.91-1.63 (7H, m, H-C4, H-C7 and H-C8), 1.32 (3H, d,  $J$  6.6, H-C16), 1.28-0.81 (6H, m, H-C9 and H-C10);  $\delta_C$  (75.5 MHz;  $CDCl_3$ ) 143.5 (C14), 134.9 (C11), 129.5 (C13), 127.7 (C12), 67.2 (C2), 59.4 (C6), 49.1 (C3), 48.1 (C5), 43.3 (C7), 30.1 (C8), 28.0 (C8), 27.3 (C4), 26.5 (C10), 26.3 (C9), 26.2 (C9), 23.9 (C16), 21.5 (C15);  $m/z$  (CI) 370 ( $MH^+$ , 100), 334 (55), 286 (62); HRMS (ES) Found  $[M+NH_4]^+$  387.1871,  $C_{19}H_{32}ClN_2O_2S$  requires 387.1868.

Crystal data.  $C_{19}H_{28}ClNO_2S$ ;  $M = 369.93$ ; Orthorhombic;  $a = 15.4076$  (3) Å,  $b = 12.9924$ (4) Å,  $c = 9.3800$ (3) Å; Volume 1877.70(9) Å<sup>3</sup>; Space group  $Pna2_1$ ;  $T = 120$  K;  $Z$  4; 10624 reflections measured, 4506 unique [ $R_{int} = 0.0506$ ]. The final R values  $R1 = 0.0699$ ,  $wR2 = 0.1726$  (observed) and  $R1 = 0.0743$ ,  $wR2 = 0.1761$  (all data). Flack parameter 0.40(12).

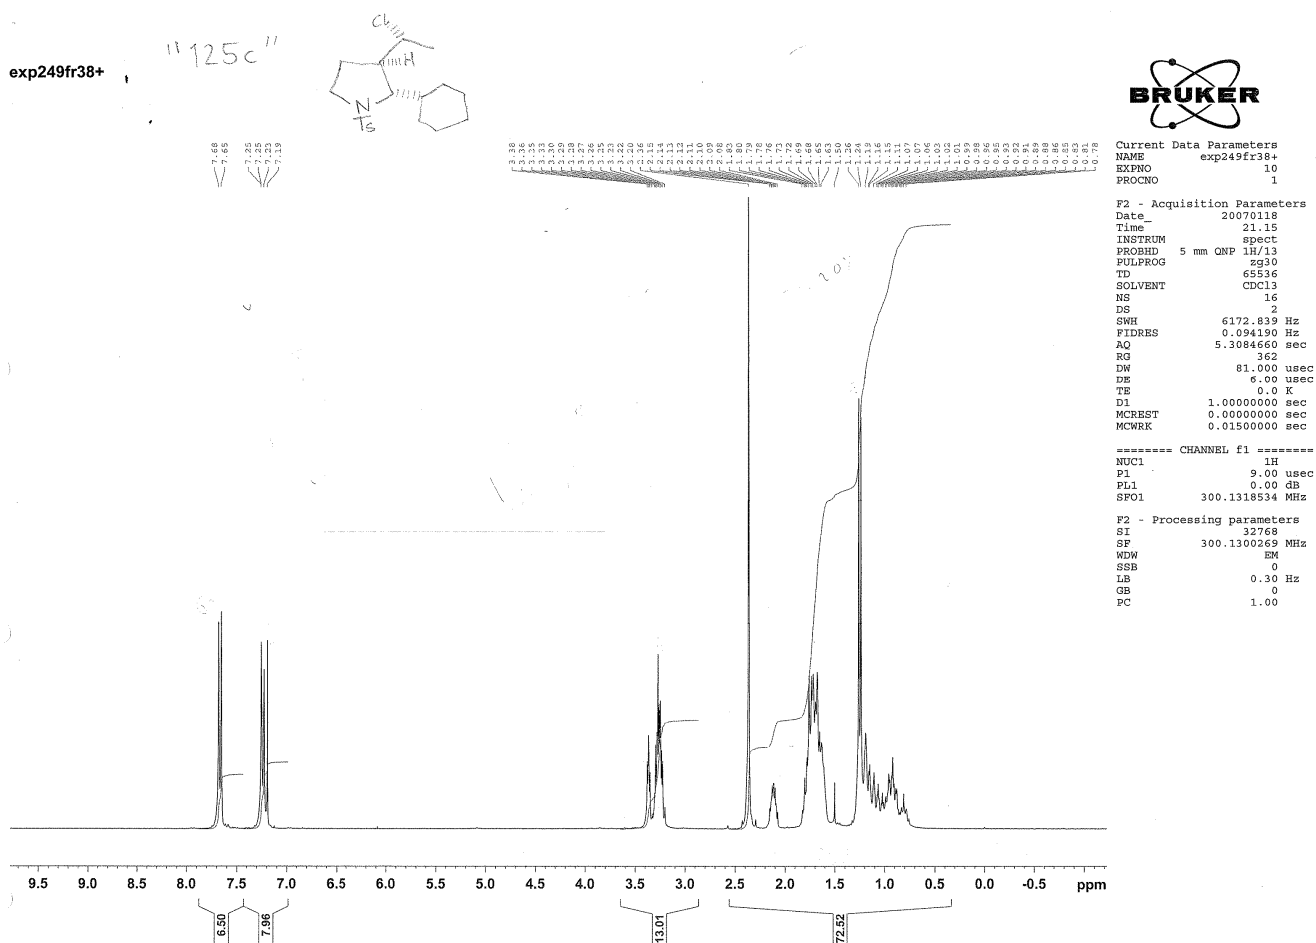

exp249fr38+

"125c"

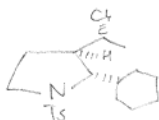

149.91  
135.33  
130.90  
129.31

77.86  
77.48  
77.48  
67.63  
59.81  
48.57  
48.51  
43.77

28.40  
28.40  
27.76  
26.77  
26.77  
24.53  
24.53  
21.97

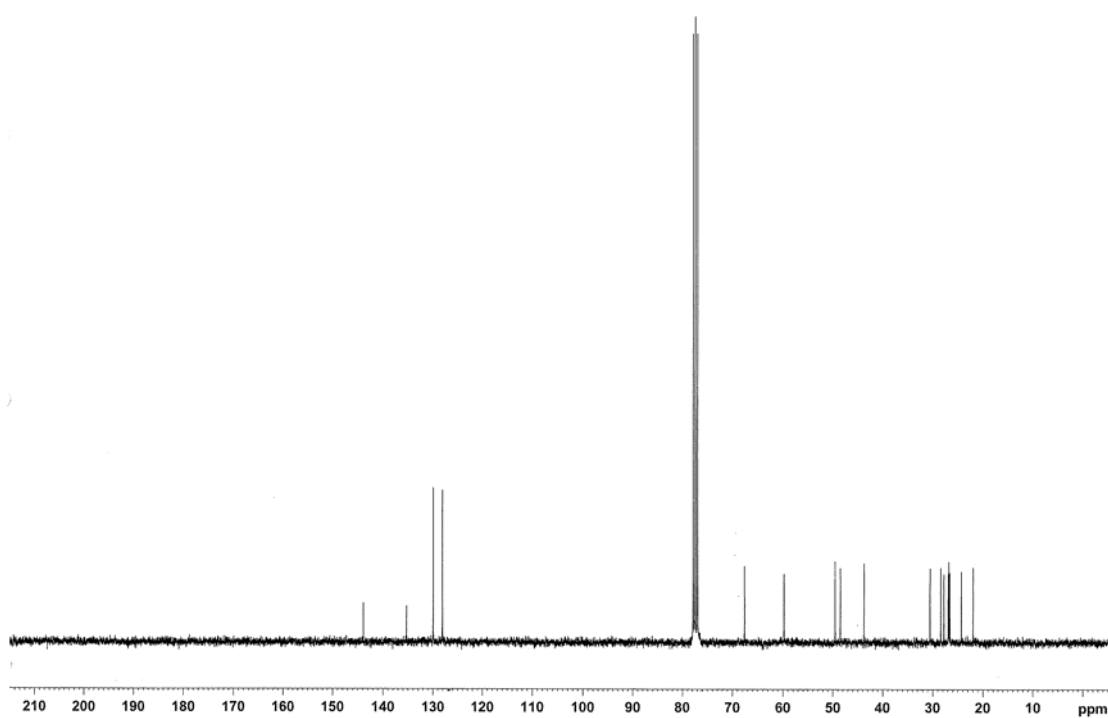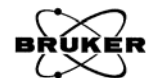

Current Data Parameters  
NAME exp249fr38+  
EXPNO 11  
PROCNO 1

F2 - Acquisition Parameters  
Date\_ 20070118  
Time 22.23  
INSTRUM spect  
PROBHD 5 mm QNP 1H/13  
PULPROG zgpg30  
TD 65536  
SOLVENT CDCl3  
NS 1024  
DS 4  
SWH 17985.611 Hz  
FIDRES 0.274439 Hz  
AQ 1.8219508 sec  
RG 724.1  
DW 27.800 usec  
DE 6.00 usec  
TE 0.0 K  
D1 2.0000000 sec  
d11 0.0300000 sec  
DELTA 1.8999998 sec  
MCREST 0.0000000 sec  
MCWRK 0.0150000 sec

----- CHANNEL f1 -----  
NUC1 13C  
P1 8.00 usec  
PL1 0.00 dB  
SFO1 75.4752953 MHz

----- CHANNEL f2 -----  
CPDPRG2 waltz16  
NUC2 1H  
PCPD2 100.00 usec  
PL2 0.00 dB  
PL12 23.00 dB  
PL13 24.00 dB  
SFO2 300.1312005 MHz

F2 - Processing parameters  
SI 32768  
SF 75.4677190 MHz  
WDW EM  
SSB 0  
LB 1.00 Hz  
GB 0  
PC 1.40

exp249fr38+

"125c"

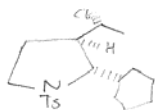

130.98  
129.11

67.63  
59.81

48.56  
48.51  
43.77  
28.40  
28.40  
27.76  
26.77  
26.77  
24.53  
24.53  
21.98

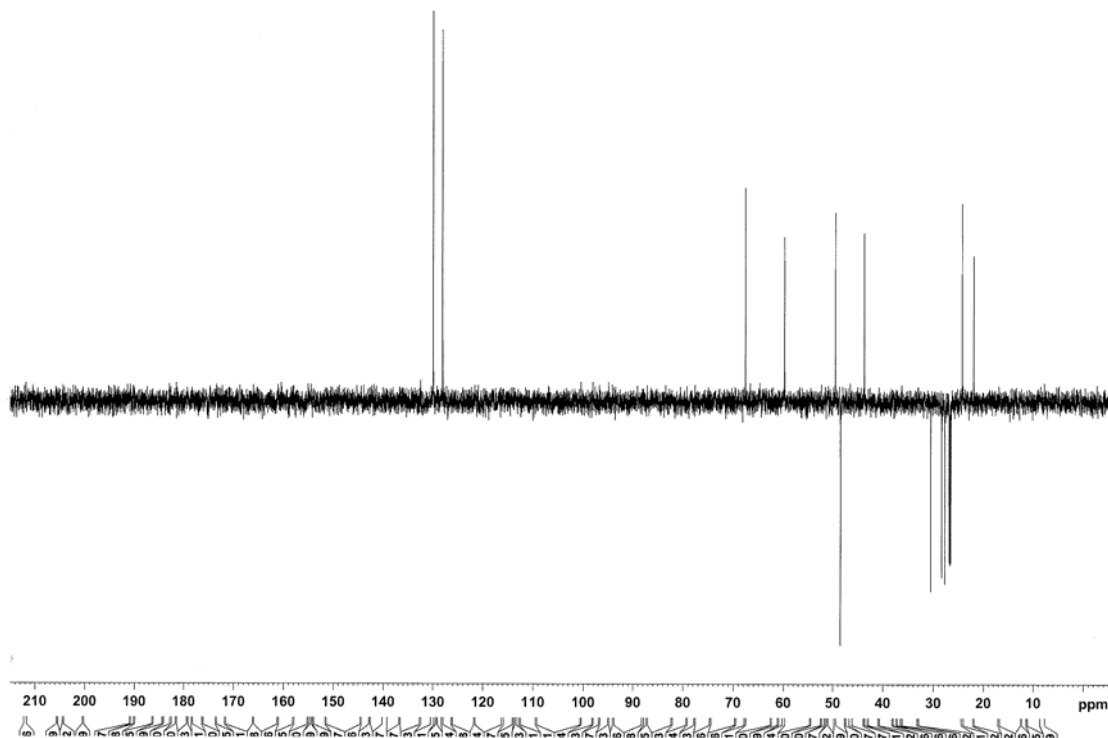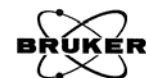

Current Data Parameters  
NAME exp249fr38+  
EXPNO 12  
PROCNO 1

F2 - Acquisition Parameters  
Date\_ 20070118  
Time 22.41  
INSTRUM spect  
PROBHD 5 mm QNP 1H/13  
PULPROG dept135  
TD 65536  
SOLVENT CDCl3  
NS 256  
DS 4  
SWH 17985.611 Hz  
FIDRES 0.274439 Hz  
AQ 1.8219508 sec  
RG 16384  
DW 27.800 usec  
DE 6.00 usec  
TE 0.0 K  
CNST2 145.0000000 sec  
D1 2.0000000 sec  
d2 0.00344828 sec  
d12 0.0002000 sec  
DELTA 0.0001019 sec  
MCREST 0.0000000 sec  
MCWRK 0.0150000 sec

----- CHANNEL f1 -----  
NUC1 13C  
P1 8.00 usec  
P2 16.00 usec  
PL1 0.00 dB  
SFO1 75.4752953 MHz

----- CHANNEL f2 -----  
CPDPRG2 waltz16  
NUC2 1H  
P3 8.00 usec  
P4 16.00 usec  
PCPD2 100.00 usec  
PL2 0.00 dB  
PL12 23.00 dB  
SFO2 300.1312005 MHz

F2 - Processing parameters  
SI 32768  
SF 75.4677190 MHz  
WDW EM  
SSB 0  
LB 1.00 Hz  
GB 0  
PC 1.40

**(2*S*,3*S*,4*S*)-Ethyl-4-chloro-3-methyl-1-tosylpiperidine-2-carboxylate/(2*R*,3*R*,4*R*)-Ethyl-4-chloro-3-methyl-1-tosylpiperidine-2-carboxylate (31d)**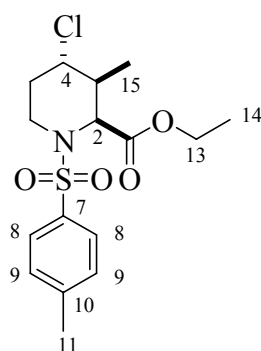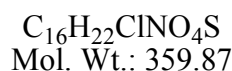

Following the general procedure, (*E*)-4-methyl-*N*-(pent-3-enyl)benzenesulfonamide (150 mg, 0.62 mmol), in the presence of a pre-heated 33% solution of ethyl 2-oxoacetate in toluene (287 mg, 0.94 mmol, 1.50 eq.), was consumed based on analysis by TLC after 1 hour of stirring at room temperature. The work up afforded a yellow oil, which was purified by flash column chromatography (90% hexane, 10% ethyl acetate) to give the *title compound* (47 mg, 0.13 mmol, 21%) as a pale yellow oil.

$\nu_{\text{max}}(\text{neat})/\text{cm}^{-1}$  2980, 1733, 1598;  $\delta_{\text{H}}$  (300 MHz;  $\text{CDCl}_3$ ) 7.62 (2H, d,  $J$  8.4, H-C8), 7.27 (2H, d,  $J$  8.4, H-C9), 4.59 (1H, d,  $J$  5.8, H-C2), 4.01 (1H, td,  $J$  11.6, 4.4, H-C4), 3.93-3.81 (1H, m, H-C6), 3.81-3.66 (2H, m, H-C13), 3.49 (1H, td,  $J$  12.8, 2.8, H-C6), 2.41 (3H, s, H-C10), 2.26 (1H, tdd,  $J$  9.5, 5.1, 2.8, H-C5), 2.14-2.01 (1H, m, H-C3), 2.01-1.85 (1H, m, H-C5), 1.14 (3H, t,  $J$  7.2, H-C14), 1.08 (3H, d,  $J$  6.9, H-C15);  $\delta_{\text{C}}$  (75.5 MHz;  $\text{CDCl}_3$ ) 168.9 (C12), 143.7 (C10), 135.6 (C7), 129.5 (C9), 127.1 (C8), 60.8 (C13), 59.6 (C2), 59.2 (C4), 42.1 (C6), 41.0 (C3), 36.0 (C5), 21.5 (C11), 15.2 (C15), 13.9 (C14);  $m/z$  (CI) 360 ( $\text{MH}^+$ , 100), 286 (65), 206 (87); HRMS (ES) Found  $[\text{M}+\text{H}]^+$  360.1029,  $\text{C}_{16}\text{H}_{23}\text{ClNO}_4\text{S}$  requires 360.1031.

exp219.1fr70-96

"124d"

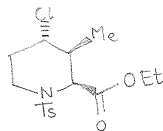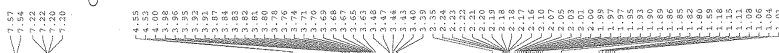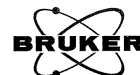

Current Data Parameters  
 NAME exp219.1fr70-96  
 EXPNO 10  
 PROCNO 1

F2 - Acquisition Parameters  
 Date 20061017  
 Time 16.37  
 INSTRUM spect  
 PROBHD 5 mm QNP 1H/13  
 PULPROG zg30  
 TD 65536  
 SOLVENT CDCl3  
 NS 16  
 DS 2  
 SWH 6172.839 Hz  
 FIDRES 0.094190 Hz  
 AQ 5.3084660 sec  
 RG 161.3  
 DW 81.000 usec  
 DE 6.00 usec  
 TE 292.1 K  
 D1 1.0000000 sec  
 MCREST 0.0000000 sec  
 MCWRK 0.0150000 sec

===== CHANNEL f1 =====  
 NUC1 1H  
 P1 9.00 usec  
 PL1 0.00 dB  
 SFO1 300.1318534 MHz

F2 - Processing parameters  
 SI 32768  
 SF 300.1300239 MHz  
 WDW EM  
 SSB 0  
 LB 0.30 Hz  
 GB 0  
 PC 1.00

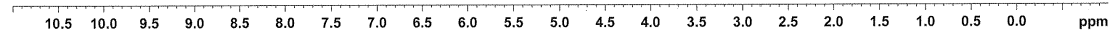

exp219.1fr70-96

"124d"

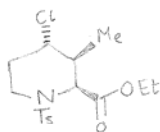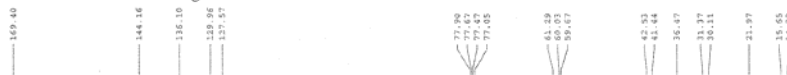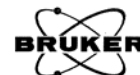

Current Data Parameters  
 NAME exp219.1fr70-96  
 EXPNO 11  
 PROCNO 1

F2 - Acquisition Parameters  
 Date 20061018  
 Time 0.05  
 INSTRUM spect  
 PROBHD 5 mm QNP 1H/13  
 PULPROG zgpg30  
 TD 65536  
 SOLVENT CDCl3  
 NS 1024  
 DS 4  
 SWH 17985.611 Hz  
 FIDRES 0.274439 Hz  
 AQ 1.8219508 sec  
 RG 724.1  
 DW 27.800 usec  
 DE 6.00 usec  
 TE 292.8 K  
 D1 2.0000000 sec  
 d11 0.0300000 sec  
 DELTA 1.89999999 sec  
 MCREST 0.0000000 sec  
 MCWRK 0.0150000 sec

===== CHANNEL f1 =====  
 NUC1 13C  
 P1 8.00 usec  
 PL1 0.00 dB  
 SFO1 75.4752953 MHz

===== CHANNEL f2 =====  
 CPDPRG2 waltz16  
 NUC2 1H  
 PCPDZ 100.00 usec  
 PL2 0.00 dB  
 PL12 23.00 dB  
 PL13 24.00 dB  
 SFO2 300.1312005 MHz

F2 - Processing parameters  
 SI 32768  
 SF 75.4677190 MHz  
 WDW EM  
 SSB 0  
 LB 1.00 Hz  
 GB 0  
 PC 1.40

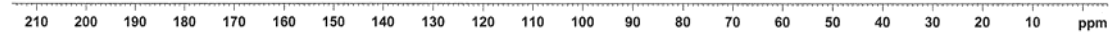

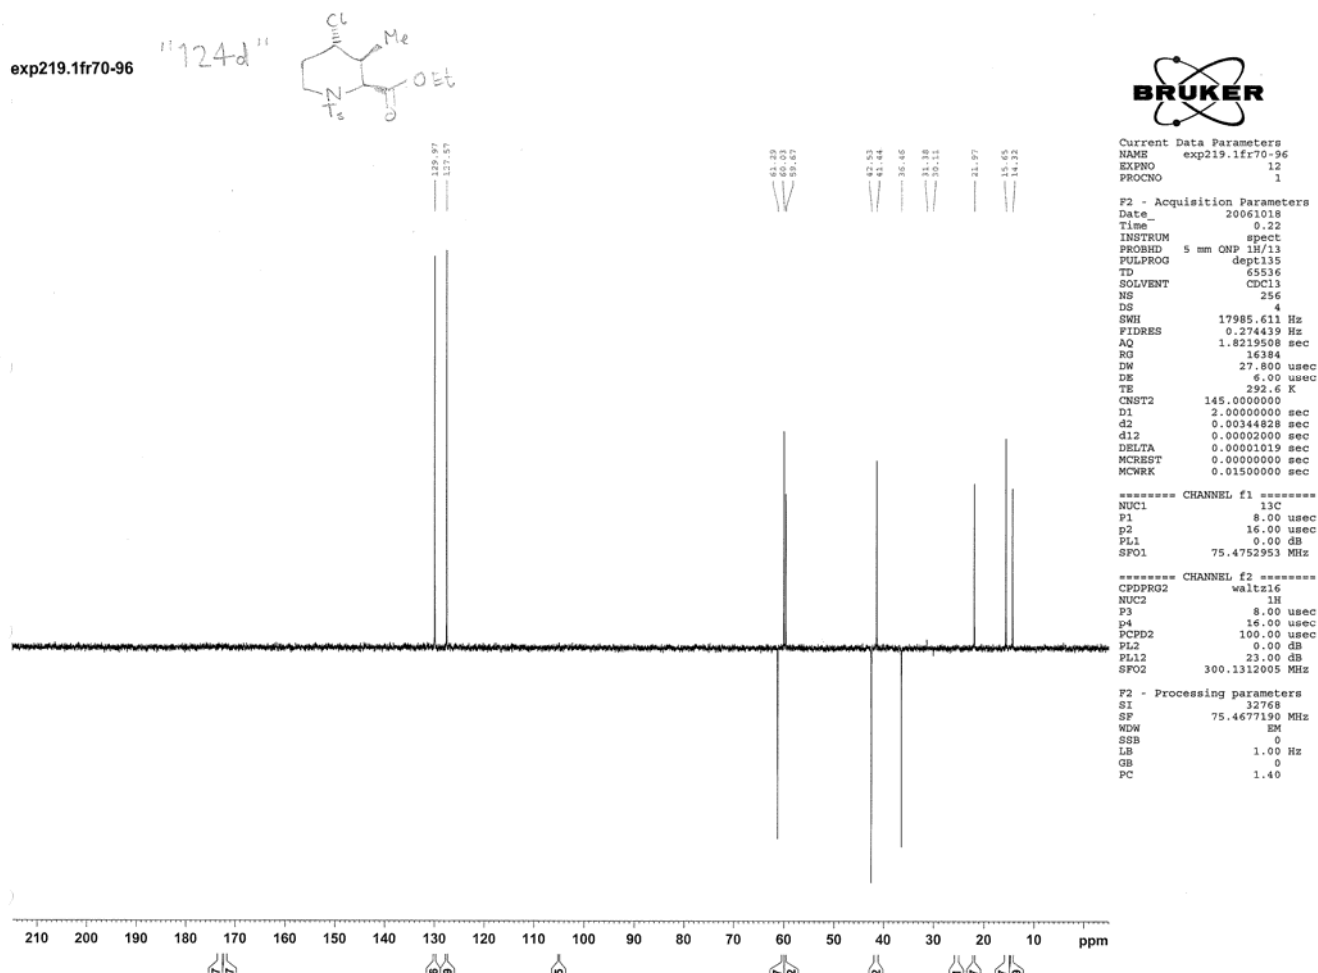

**(2S,3S)-2-Phenethyl-3-(prop-1-en-2-yl)-1-tosylpyrrolidine/(2R,3R)-2-Phenethyl-3-(prop-1-en-2-yl)-1-tosylpyrrolidine and (±)-2-Phenethyl-3-(propan-2-ylidene)-1-tosylpyrrolidine**

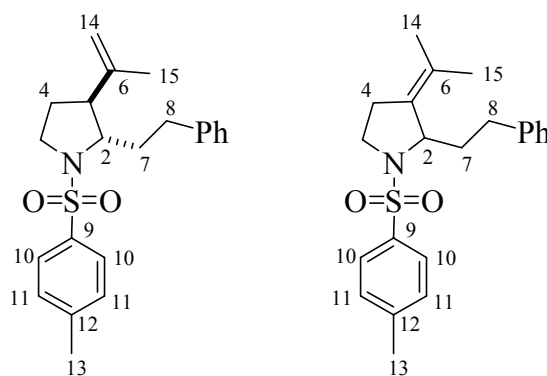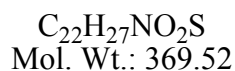

Following the general procedure, 4-methyl-*N*-(4-methylpent-3-enyl)benzenesulfonamide (100 mg, 0.39 mmol), in the presence of 3-phenylpropanal (80 mg, 0.59 mmol), was consumed based on analysis by TLC after 6 hours of stirring at room temperature. The work up afforded a yellow oil, which was purified by flash column chromatography (90% hexane, 10% ethyl acetate) to give the two regioisomer *title compounds* as only a partially separable mixture (108 mg, 0.29 mmol, 75%) as a colourless oil.

**(2S,3S)-2-Phenethyl-3-(prop-1-en-2-yl)-1-tosylpyrrolidine/(2R,3R)-2-Phenethyl-3-(prop-1-en-2-yl)-1-tosylpyrrolidine (major regioisomer)**

$\nu_{\max}(\text{neat})/\text{cm}^{-1}$  3026, 2925, 1644, 1599 (mixture);  $\delta_{\text{H}}$  (300 MHz;  $\text{CDCl}_3$ ) 7.69-7.61 (2H, m, H-C10), 7.30-7.24 (2H, m, H-C11), 7.27-7.13 (5H, m, Ar-H), 4.46-4.40 (1H, m, H-C2), 3.47-3.32 (2H, m, H-C5), 2.71-2.58 (2H, m, H-C8), 2.40 (3H, s, H-C13), 2.28-2.10 (1H, m, H-C4), 2.09-1.94 (1H, m, H-C4), 1.95-1.81 (2H, m, H-C7), 1.39 (3H, s, H-C15), 1.37 (3H, s, H-C14);  $\delta_{\text{C}}$  (75.5 MHz;  $\text{CDCl}_3$ ) 143.2 (C12), 142.1 (ArC), 135.2 (C9), 132.2 (C3), 129.3 (C11), 128.4 (ArC), 128.2 (ArC), 127.4 (C10), 125.6 (ArC), 123.8 (C6), 62.0 (C2), 48.7 (C5), 37.2 (C4), 36.4 (C7), 31.7 (C8), 21.4 (C13), 21.0 (C15), 19.9 (C15);  $m/z$  (CI) 370 ( $\text{MH}^+$ , 100), 264 (18), 216 (35); HRMS (ES) Found  $[\text{M}+\text{H}]^+$  (mixture) 370.1837,  $\text{C}_{22}\text{H}_{28}\text{NO}_2\text{S}$  requires 370.1835.

**(±)-2-Phenethyl-3-(propan-2-ylidene)-1-tosylpyrrolidine (minor regioisomer)**

$\delta_{\text{H}}$  (300 MHz;  $\text{CDCl}_3$ ) 7.69-7.61 (2H, m, H-C10), 7.30-7.24 (2H, m, H-C11), 7.30-7.24 (5H, m, Ar-H), 4.59-4.56 (1H, m, H-C14), 4.41-4.39 (1H, m, H-C14), 3.51-3.41 (1H, m, H-C2), 3.54-3.38 (2H, m, H-C5), 2.83-2.65 (2H, m, H-C8), 2.66-2.50 (1H, m, H-C3), 2.40 (3H, s, H-C13), 2.28-2.10 (1H, m, H-C4), 2.09-1.94 (1H, m, H-C4), 1.87-1.70 (2H, m, H-C7), 1.51 (3H, s, H-C15);  $\delta_{\text{C}}$  (75.5 MHz;  $\text{CDCl}_3$ ) 143.9 (C6), 143.3 (C12), 141.7 (ArC), 134.9 (C9), 129.5 (C11), 128.5 (ArC), 128.2 (ArC), 127.5 (C10), 125.7 (ArC), 111.9 (C14), 62.3 (C2), 51.7 (C3), 46.8 (C5), 31.4 (C8), 29.7 (C7), 28.2 (C4), 21.4 (C13), 20.9 (C15);  $m/z$  (CI) 370 ( $\text{MH}^+$ , 100), 264 (15), 216 (40).

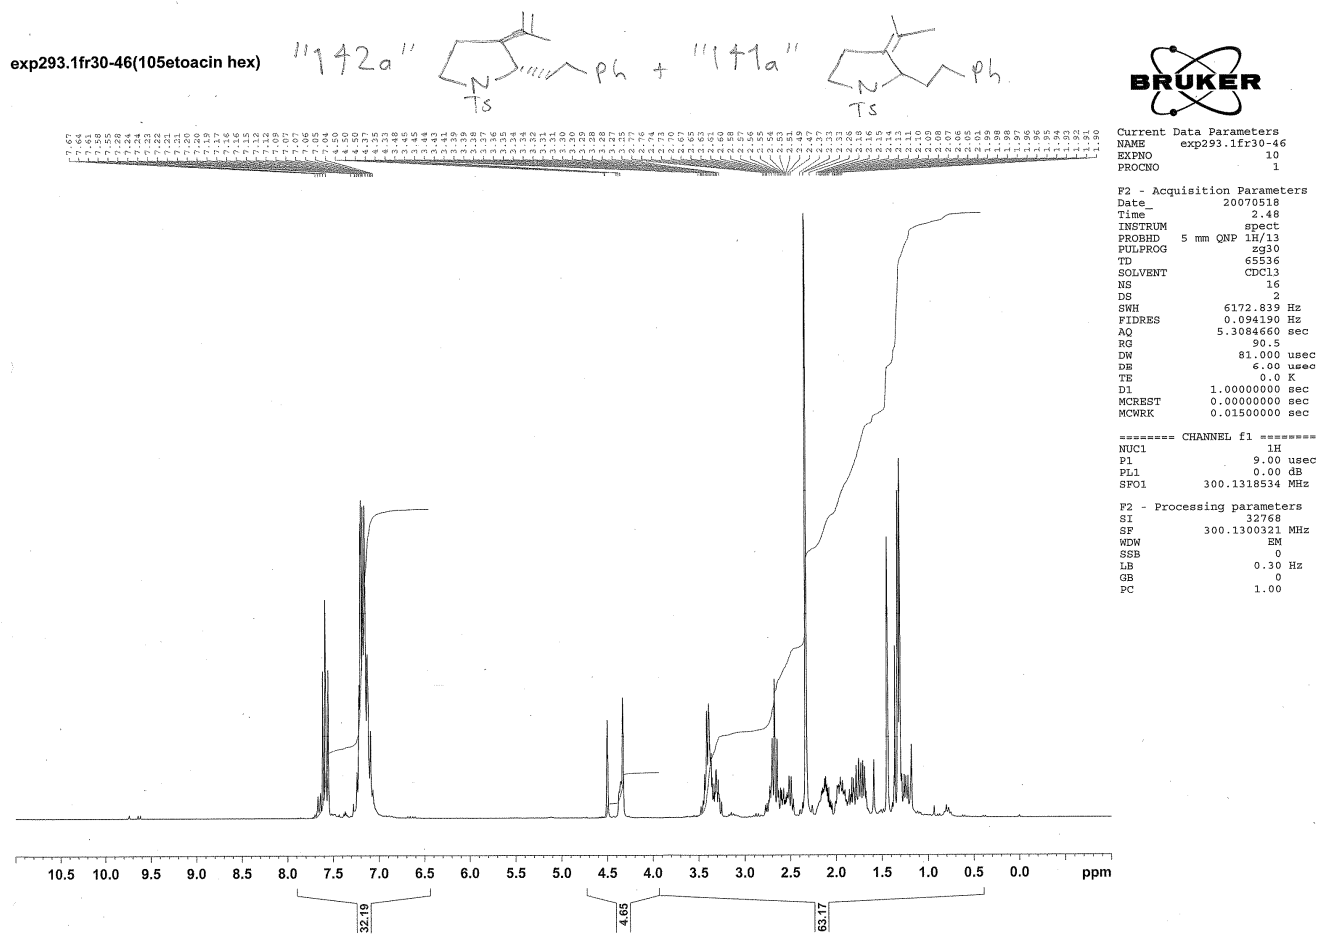

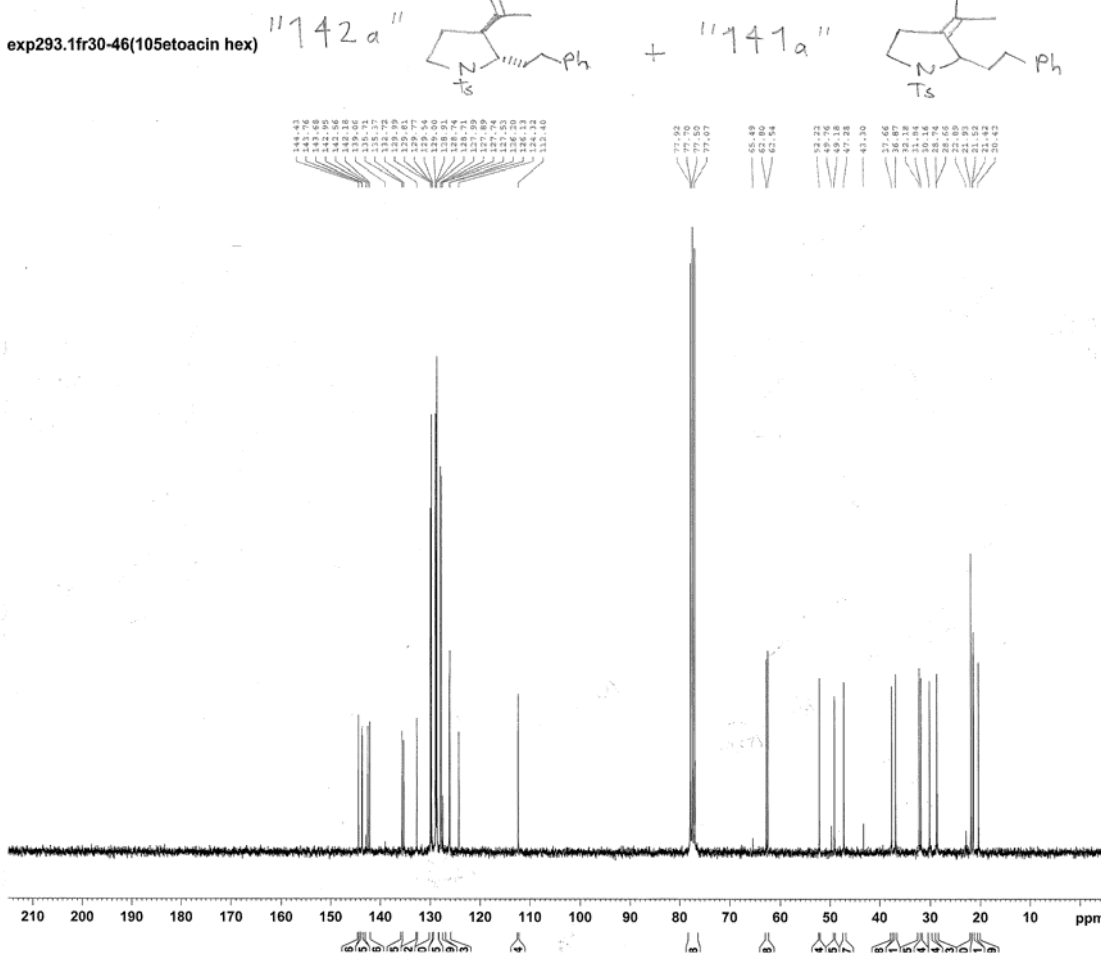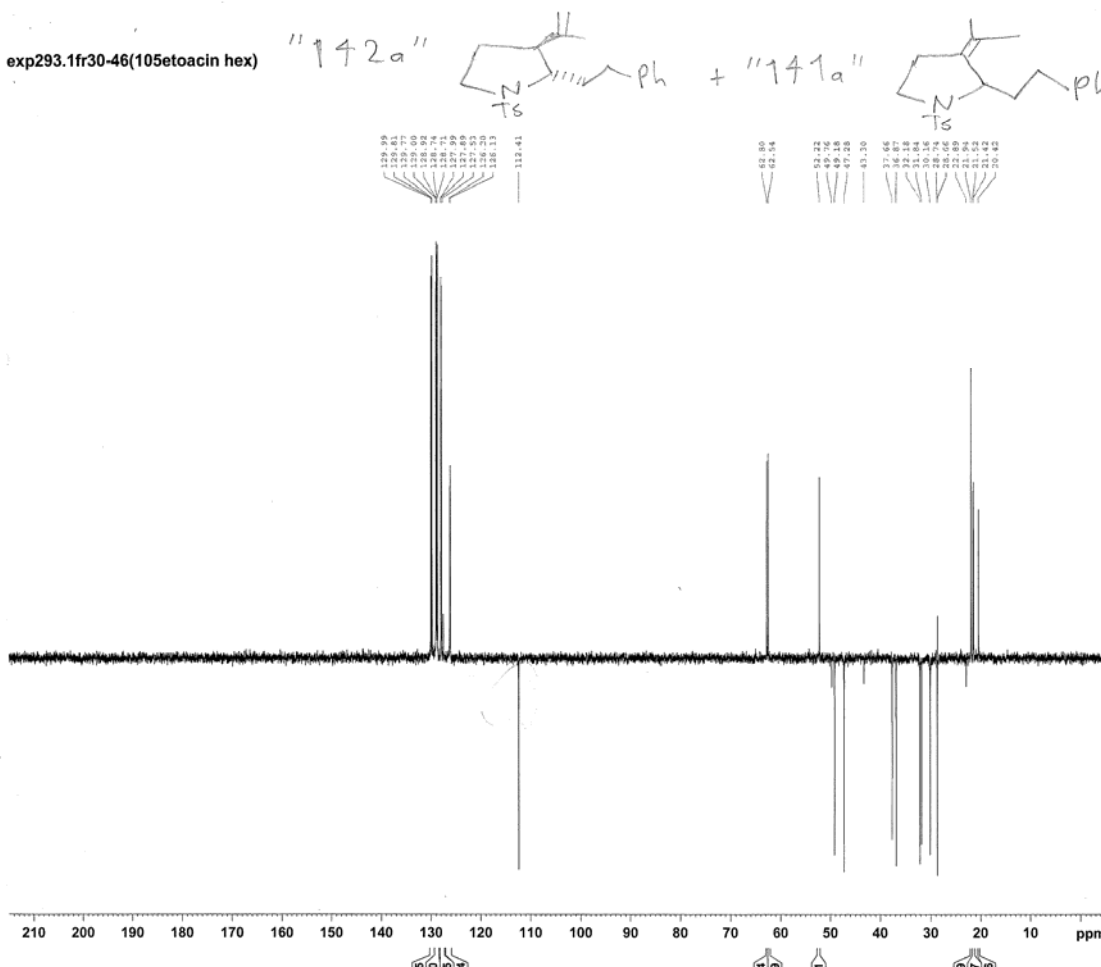



**(2*S*,3*S*)-2-Heptyl-3-(prop-1-en-2-yl)-1-tosylpyrrolidine/(2*R*,3*R*)-2-Heptyl-3-(prop-1-en-2-yl)-1-tosylpyrrolidine and (±)-2-Heptyl-3-(propan-2-ylidene)-1-tosylpyrrolidine**

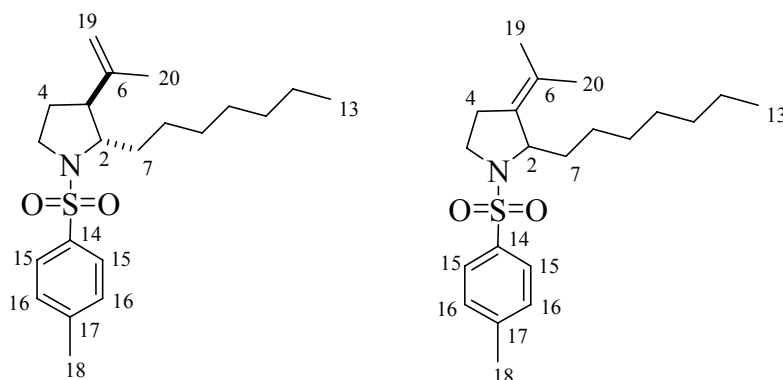

$C_{21}H_{33}NO_2S$   
Mol. Wt.: 363.56

Following the general procedure, 4-methyl-*N*-(4-methylpent-3-enyl)benzenesulfonamide (100 mg, 0.39 mmol), in the presence of octanal (76 mg, 0.59 mmol), was consumed based on analysis by TLC after 6 hours of stirring at room temperature. The work up afforded a yellow oil, which was purified by flash column chromatography (90% hexane, 10% ethyl acetate) to give the two *title compounds* as a partially separable mixture (85 mg, 0.23 mmol, 60%) as a colourless oil.

**(2*S*,3*S*)-2-Heptyl-3-(prop-1-en-2-yl)-1-tosylpyrrolidine/(2*R*,3*R*)-2-Heptyl-3-(prop-1-en-2-yl)-1-tosylpyrrolidine (major regioisomer)**

$\nu_{\max}(\text{neat})/\text{cm}^{-1}$  2926, 1735, 1645, 1598 (mixture);  $\delta_{\text{H}}$  (300 MHz;  $\text{CDCl}_3$ ) 7.72 (2H, d,  $J$  8.3, H-C15), 7.29 (2H, d,  $J$  8.3, H-C16), 4.39-4.33 (1H, m, H-C2), 3.52-3.37 (2H, m, H-C5), 2.42 (3H, s, H-C18), 1.86-1.70 (2H, m, H-C4), 1.70-1.57 (2H, m, H-C7), 1.43 (3H, s, H-C20), 1.39 (3H, s, H-C19), 1.37-1.17 (10H, m, H-C8 to H-C12), 0.91-0.84 (3H, m, H-C13);  $\delta_{\text{C}}$  (75.5 MHz;  $\text{CDCl}_3$ ) 143.0 (C17), 135.5 (C14), 132.5 (C3), 129.2 (C16), 127.4 (C15), 123.3 (C6), 62.3 (C2), 46.6 (C5), 34.7 (C4), 31.8 (C11), 29.6 (C7), 29.4 (C9 and C10), 25.4 (C8), 22.6 (C12), 21.5 (C18), 21.0 (C20), 20.2 (C19), 14.1 (C13);  $m/z$  (CI) 364 ( $\text{MH}^+$ , 100), 264 (40), 210 (38); HRMS (ES) Found  $[\text{M}+\text{NH}_4]^+$  (mixture) 381.2569,  $C_{21}H_{37}N_2O_2S$  requires 381.2570.

**(±)-2-Heptyl-3-(propan-2-ylidene)-1-tosylpyrrolidine (minor regioisomer)**

$\delta_{\text{H}}$  (300 MHz;  $\text{CDCl}_3$ ) 7.65 (2H, d,  $J$  8.4, H-C15), 7.24 (2H, d,  $J$  8.4, H-C16), 4.56-4.52 (1H, m, H-C19), 4.43-4.37 (1H, m, H-C19), 3.52-3.39 (1H, m, H-C2), 3.40-3.25 (2H, m, H-C5), 2.49 (1H, dd,  $J$  13.2, 6.8, H-C3), 2.40 (3H, s, H-C18), 2.27-2.12 (1H, m, H-C4), 2.08-1.94 (1H, m, H-C4), 1.55 (3H, s, H-C20), 1.54-1.43 (2H, m, H-C7), 1.37-1.17 (10H, m, H-C8 to H-C12), 0.91-0.84 (3H, m, H-C13);  $\delta_{\text{C}}$  (75.5 MHz;  $\text{CDCl}_3$ ) 144.2 (C6), 143.2 (C17), 135.4 (C14), 129.5 (C16), 127.5 (C15), 111.4 (C19), 63.2 (C2), 51.2 (C3), 48.5 (C5), 35.8 (C4), 31.8 (C11), 29.7 (C7), 29.3 (C9), 28.2 (C10), 25.1 (C8), 22.6 (C12), 21.5 (C18), 21.0 (C20), 14.1 (C13);  $m/z$  (CI) 364 ( $\text{MH}^+$ , 100), 264 (30), 210 (44).



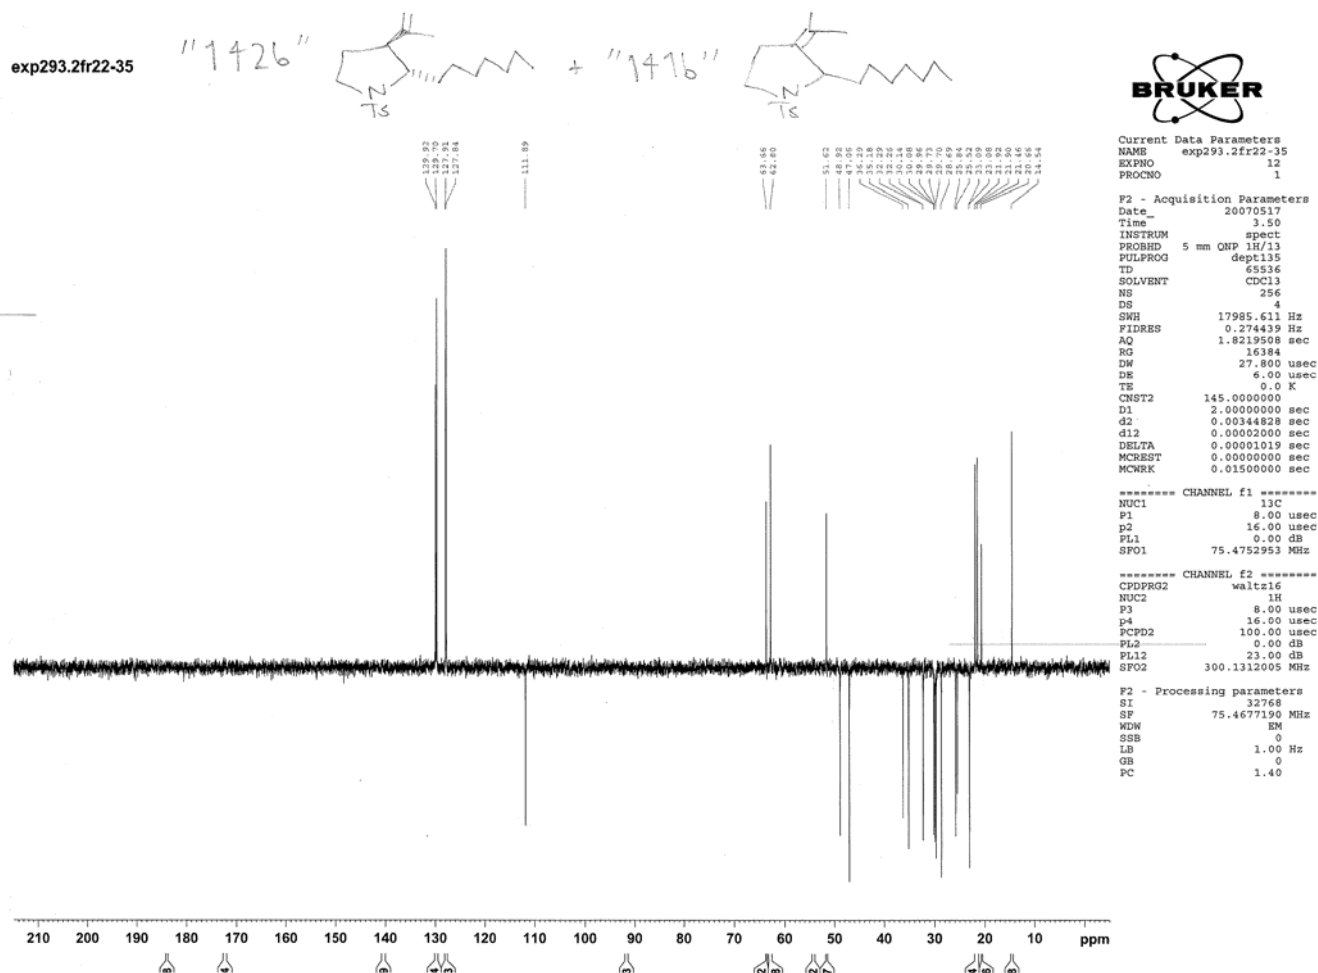

(±)-4-Methyl-2-phenethyl-1-tosyl-1,2,3,6-tetrahydropyridine (33a) and (±)-4-Methyl-2-phenethyl-1-tosyl-1,2,5,6-tetrahydropyridine (34a)

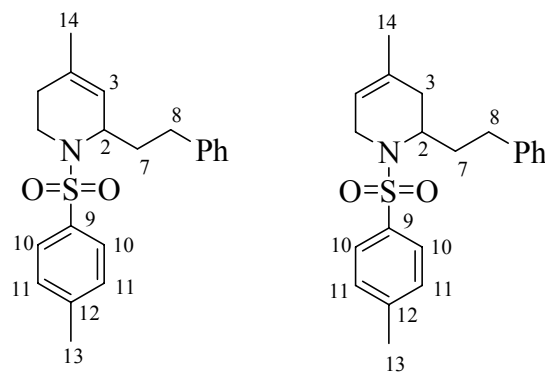

$C_{21}H_{25}NO_2S$   
 Mol. Wt.: 355.49

Following the general procedure, 4-methyl-*N*-(3-methylbut-3-enyl)benzenesulfonamide (250 mg, 1.04 mmol), in the presence of 3-phenylpropanal (210 mg, 1.56 mmol), was consumed based on analysis by TLC after 2 hours of stirring at room temperature. The work up afforded a yellow oil, which was purified by flash column chromatography (90% hexane, 10% ethyl acetate) to give the *title compounds* as an inseparable mixture (331 mg, 0.93 mmol, 90%) as a pale yellow oil.

(±)-4-Methyl-2-phenethyl-1-tosyl-1,2,3,6-tetrahydropyridine (33a)

$\nu_{\max}(\text{neat})/\text{cm}^{-1}$  3026, 2929, 1736, 1598 (mixture);  $\delta_{\text{H}}$  (300 MHz;  $\text{CDCl}_3$ ) 7.82-7.79 (2H, m, H-C10), 7.44-7.39 (2H, m, H-C11), 7.39-7.23 (5H, m, Ar-H), 5.48-5.42 (1H, m, H-C3), 4.50-4.37 (1H, m, H-C2), 3.98 (1H, dd,  $J$  14.6, 6.1, H-C6), 3.28 (1H, ddd,  $J$  14.6, 11.8, 4.8, H-C6), 3.07 (1H, t,  $J$  7.5, H-C8), 2.95-2.86 (1H, m, H-C8), 2.51 (3H, s, H-C13), 2.00-1.89 (2H, m, H-C7), 1.87-1.72 (2H, m, H-C5), 1.64 (3H, s, H-C14);  $\delta_{\text{C}}$  (75.5 MHz;  $\text{CDCl}_3$ ) 142.9 (C12), 141.9 (ArC), 138.4 (C9), 132.7 (C4), 129.4 (C11), 128.3 (ArC), 128.3 (ArC), 127.0 (C10), 125.7 (ArC), 121.5 (C3), 53.6 (C2), 40.4 (C6), 36.8 (C5), 32.8 (C8), 28.1 (C7), 23.2 (C14), 21.5 (C13);  $m/z$  (CI) (mixture) 356 ( $\text{MH}^+$ , 100), 250 (25), 202 (37); HRMS (ES) Found  $[\text{M}+\text{H}]^+$  (mixture) 356.1682,  $\text{C}_{21}\text{H}_{26}\text{NO}_2\text{S}$  requires 356.1679.

**(±)-4-Methyl-2-phenethyl-1,2,5,6-tetrahydropyridine (34a)**

$\delta_{\text{H}}$  (300 MHz;  $\text{CDCl}_3$ ) 7.79-7.75 (2H, m, H-C10), 7.38-7.34 (2H, m, H-C11), 7.39-7.23 (5H, m, Ar-H), 5.40-5.35 (1H, m, H-C5), 4.31-4.23 (1H, m, H-C2), 4.26-4.18 (1H, m, H-C6), 3.77-3.62 (1H, m, H-C6), 2.88-2.70 (2H, m, H-C8), 2.51 (3H, s, H-C13), 2.24-2.12 (1H, m, H-C3), 1.87-1.71 (2H, m, H-C7), 1.77-1.65 (1H, m, H-C3), 1.60 (3H, s, H-C14);  $\delta_{\text{C}}$  (75.5 MHz;  $\text{CDCl}_3$ ) 142.9 (C12), 141.7 (ArC), 137.9 (C9), 131.0 (C4), 129.5 (C11), 128.4 (ArC), 128.3 (ArC), 126.9 (C10), 125.9 (ArC), 116.0 (C5), 50.7 (C2), 45.3 (C6), 38.5 (C3), 32.7 (C8), 27.5 (C7), 23.4 (C14), 21.5 (C13).

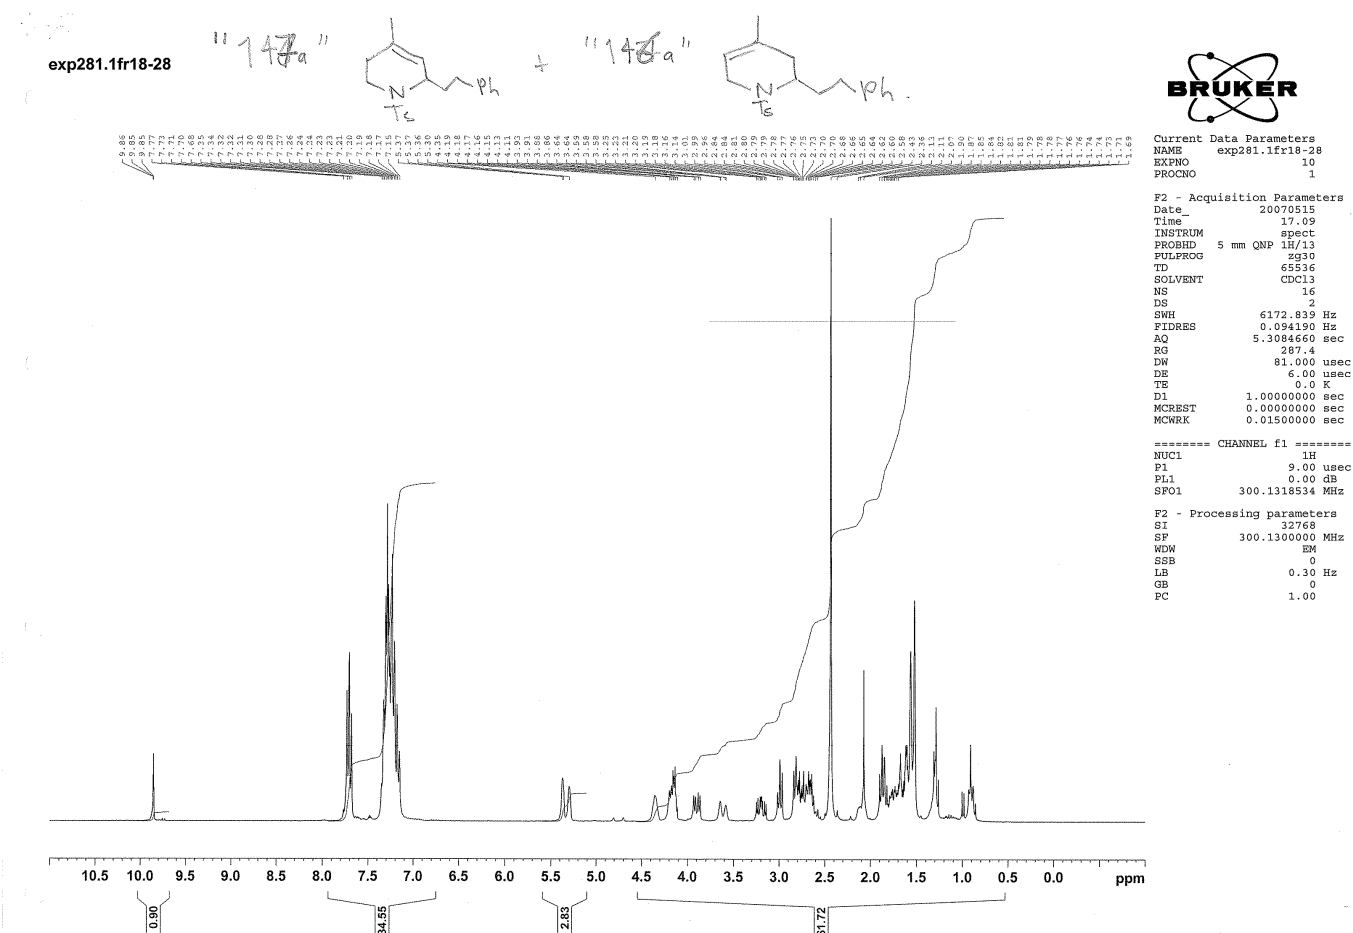

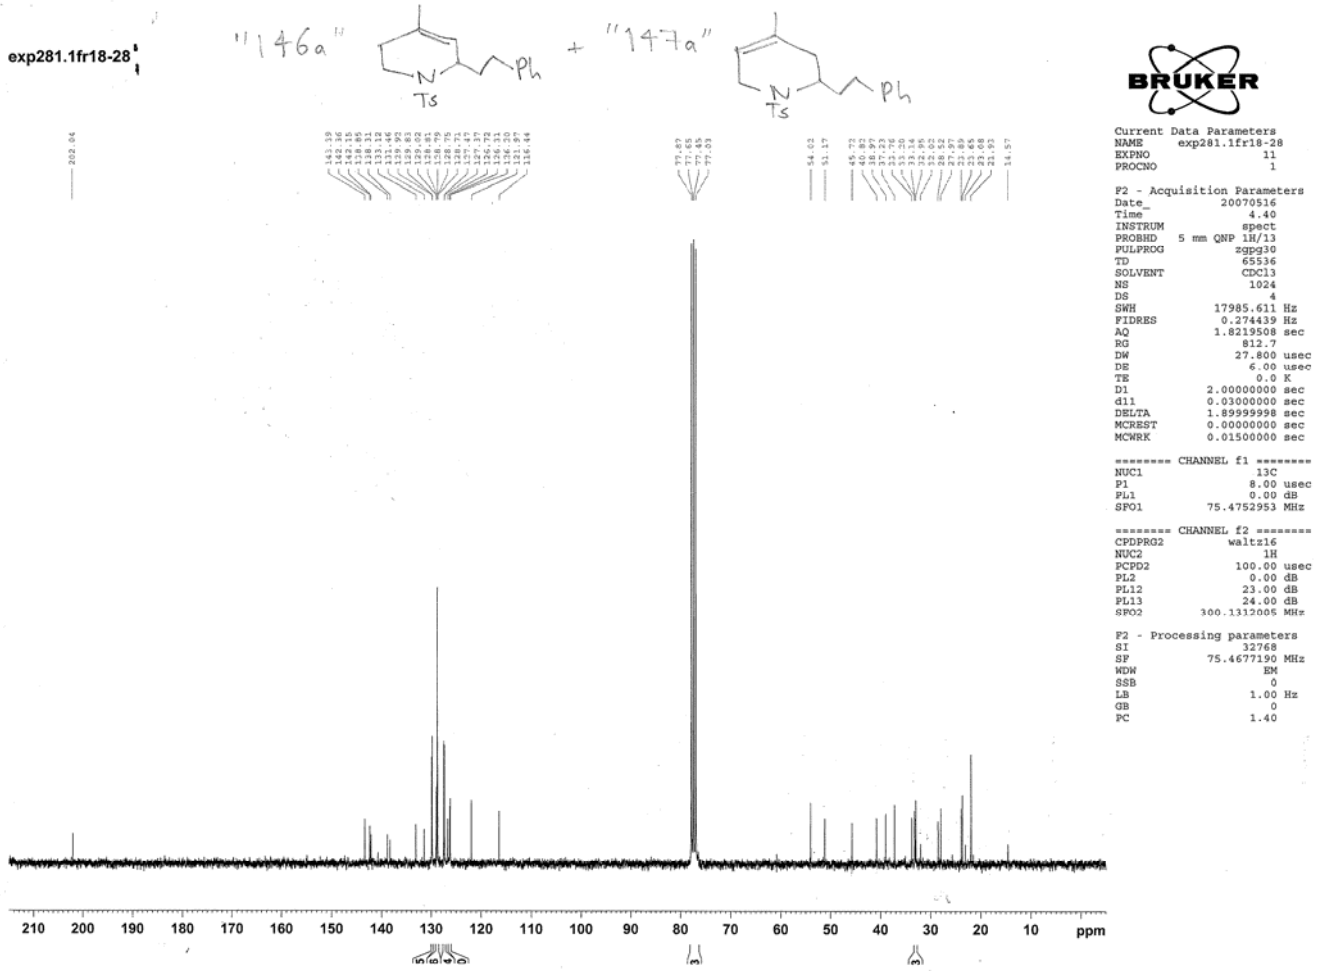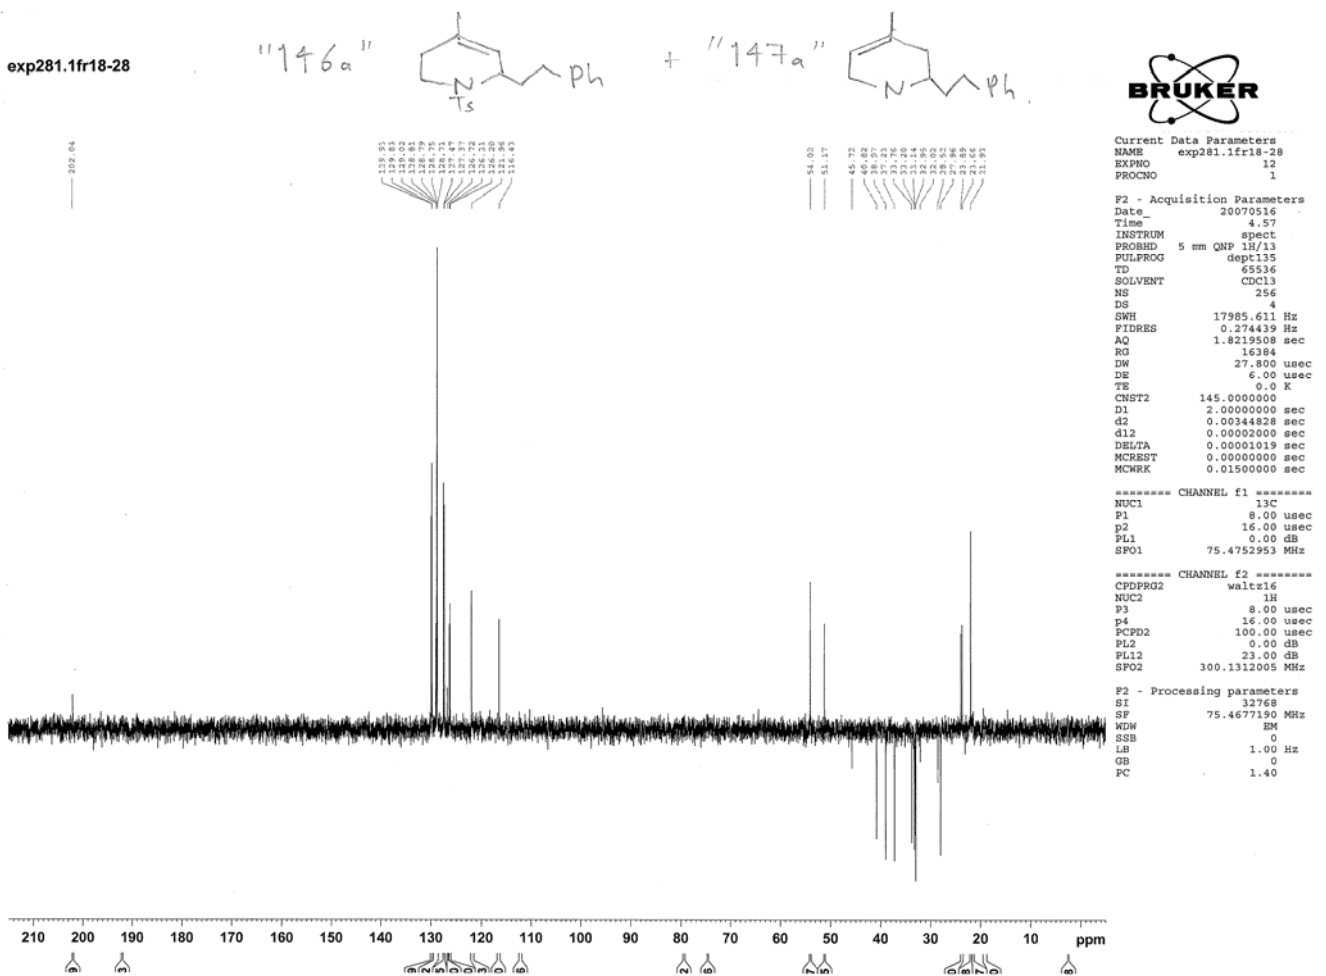

**(±)-2-Heptyl-4-methyl-1-tosyl-1,2,3,6-tetrahydropyridine (33b) and (±)-2-Heptyl-4-methyl-1-tosyl-1,2,5,6-tetrahydropyridine (34b)**

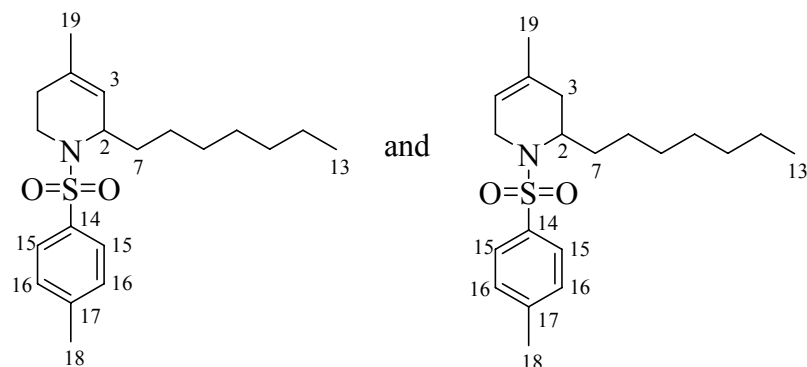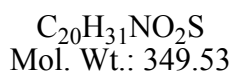

Following the general procedure, 4-methyl-*N*-(3-methylbut-3-enyl)benzenesulfonamide (250 mg, 1.04 mmol), in the presence of octanal (200 mg, 1.56 mmol), was consumed based on analysis by TLC after 2 hours of stirring at room temperature. The work up afforded a yellow oil, which was purified by flash column chromatography (90% hexane, 10% ethyl acetate) to give the *title compounds* (265 mg, 0.76 mmol, 73%) as a pale yellow oil.

**(±)-2-Heptyl-4-methyl-1-tosyl-1,2,3,6-tetrahydropyridine (33b, major regioisomer)**

$\nu_{\max}(\text{neat})/\text{cm}^{-1}$  2927, 1598 (mixture);  $\delta_{\text{H}}$  (300 MHz;  $\text{CDCl}_3$ ) 7.73-7.68 (2H, m, H-C15), 7.27-7.23 (2H, m, H-C16), 5.36-5.30 (1H, m, H-C3), 4.31-4.16 (1H, m, H-C2), 3.82 (1H, dd,  $J$  14.6, 6.2, H-C6), 3.11 (1H, ddd,  $J$  14.6, 11.9, 4.7, H-C6), 2.40 (3H, s, H-C18), 1.77-1.58 (1H, m, H-C5), 1.58-1.44 (1H, m, H-C5), 1.55 (3H, s, H-C19), 1.46-1.34 (2H, m, H-C7), 1.38-1.11 (10H, m, H-C8 to H-C12), 0.91-0.84 (3H, m, H-C13);  $\delta_{\text{C}}$  (75.5 MHz;  $\text{CDCl}_3$ ) 142.8 (C17), 138.6 (C14), 132.1 (C4), 129.3 (C16), 127.0 (C15), 121.9 (C3), 53.8 (C2), 38.4 (C6), 32.7 (C5), 31.8 (C11), 31.6 (C7), 29.5 (C9), 29.2 (C10), 26.2 (C8), 23.2 (C19), 22.6 (C12), 21.5 (C18), 14.1 (C13);  $m/z$  (CI) (mixture) 350 ( $\text{MH}^+$ , 100), 250 (12), 196 (40); HRMS (ES) Found  $[\text{M}+\text{H}]^+$  (mixture) 350.2148,  $C_{20}H_{32}NO_2S$  requires 350.2149.

**(±)-2-Heptyl-4-methyl-1-tosyl-1,2,5,6-tetrahydropyridine (34b, minor regioisomer)**

$\delta_{\text{H}}$  (300 MHz;  $\text{CDCl}_3$ ) 7.68-7.64 (2H, m, H-C15), 7.23-7.19 (2H, m, H-C16), 5.29-5.22 (1H, m, H-C5), 4.14-4.03 (1H, m, H-C6), 4.09-4.01 (1H, m, H-C2), 3.58-3.46 (1H, m, H-C6), 2.40 (3H, s, H-C18), 2.16-1.98 (1H, m, H-C3), 1.58-1.47 (1H, m, H-C3), 1.49 (3H, s, H-C19), 1.55-1.41 (2H, m, H-C7), 1.38-1.11 (10H, m, H-C8 to H-C12), 0.91-0.84 (3H, m, H-C13);  $\delta_{\text{C}}$  (75.5 MHz;  $\text{CDCl}_3$ ) 142.8 (C17), 138.0 (C14), 131.1 (C4), 129.4 (C16), 126.9 (C15), 116.0 (C5), 50.9 (C2), 40.3 (C6), 35.2 (C3), 31.8 (C11), 31.2 (C7), 29.3 (C9), 29.2 (C10), 26.4 (C8), 23.5 (C19), 22.7 (C12), 21.5 (C18), 14.1 (C13).

exp281.2fr17-32

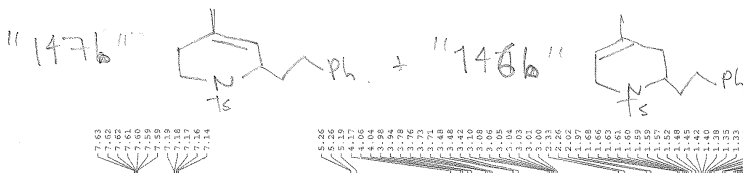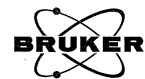

```
Current Data Parameters
NAME      exp281.2fr17-32
EXPNO    10
PROCNO   1

F2 - Acquisition Parameters
Date_    20070515
Time     18.04
INSTRUM spect
PROBHD   5 mm QNP 1H/13
PULPROG zg30
TD       65536
SOLVENT  CDCl3
NS       16
DS       2
SWH      6172.839 Hz
FIDRES   0.034190 Hz
AQ       5.3084660 sec
RG       143.7
DW       81.000 usec
DE       6.00 usec
TE       0.0 K
D1       1.0000000 sec
MCREST   0.0000000 sec
MCMRK    0.0150000 sec

===== CHANNEL f1 =====
NUC1      1H
P1        9.00 usec
PL1       0.00 dB
SFO1      300.1318534 MHz

F2 - Processing parameters
SI        32768
SF        300.1300269 MHz
WDW       EM
SSB       0
LB        0.30 Hz
GB        0
PC        1.00
```

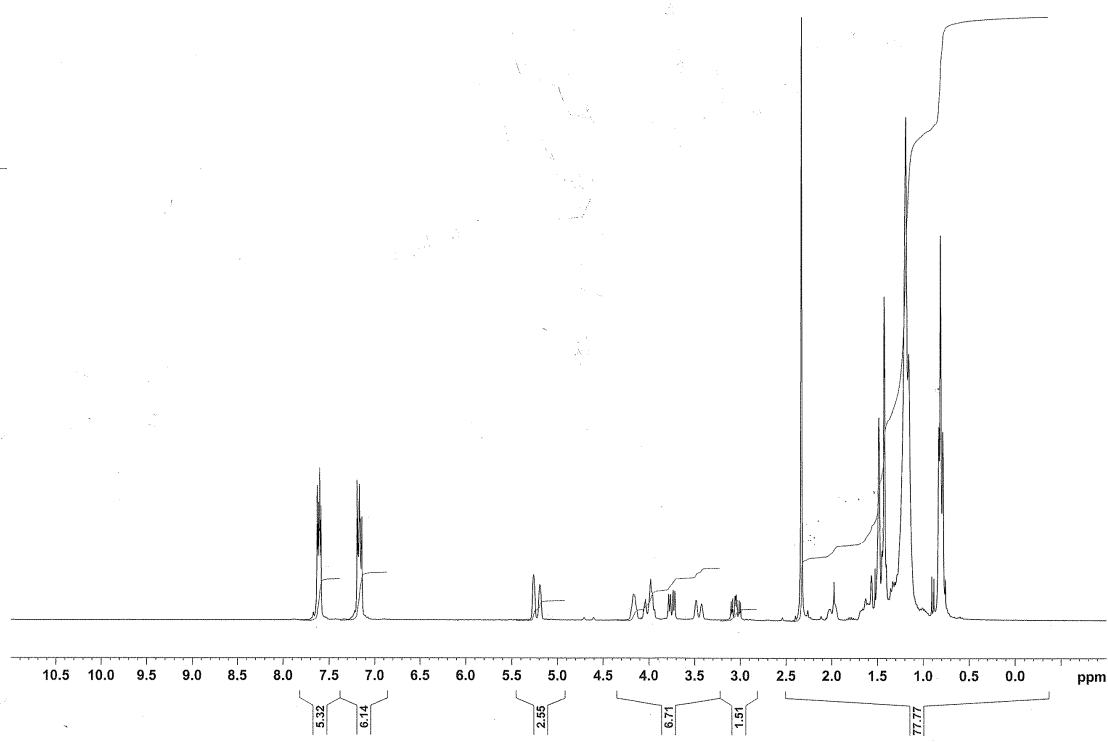

exp281.2fr17-32

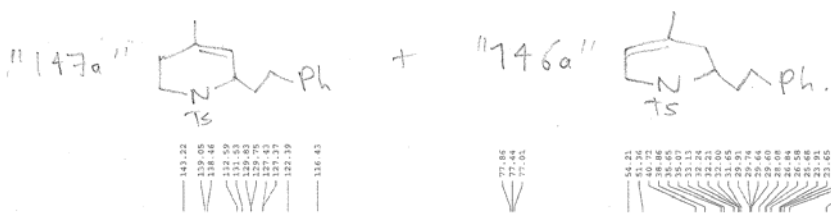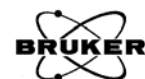

```
Current Data Parameters
NAME      exp281.2fr17-32
EXPNO    11
PROCNO   1

F2 - Acquisition Parameters
Date_    20070516
Time     20.35
INSTRUM spect
PROBHD   5 mm QNP 1H/13
PULPROG zgpg30
TD       65536
SOLVENT  CDCl3
NS       1024
DS       4
SWH      17985.611 Hz
FIDRES   0.274439 Hz
AQ       1.8219508 sec
RG       1824.6
DW       27.800 usec
DE       6.00 usec
TE       0.0 K
D1       2.0000000 sec
d11      0.0300000 sec
DELTA    1.8999999 sec
MCREST   0.0000000 sec
MCMRK    0.0150000 sec

===== CHANNEL f1 =====
NUC1      13C
P1        8.00 usec
PL1       0.00 dB
SFO1      75.4752953 MHz

===== CHANNEL f2 =====
CPDPRG2  waltz16
NUC2      1H
PCPD2    100.00 usec
PL2       0.00 dB
PL12     23.00 dB
PL13     24.00 dB
SFO2     300.1312005 MHz

F2 - Processing parameters
SI        32768
SF        75.4677190 MHz
WDW       EM
SSB       0
LB        1.00 Hz
GB        0
PC        1.40
```

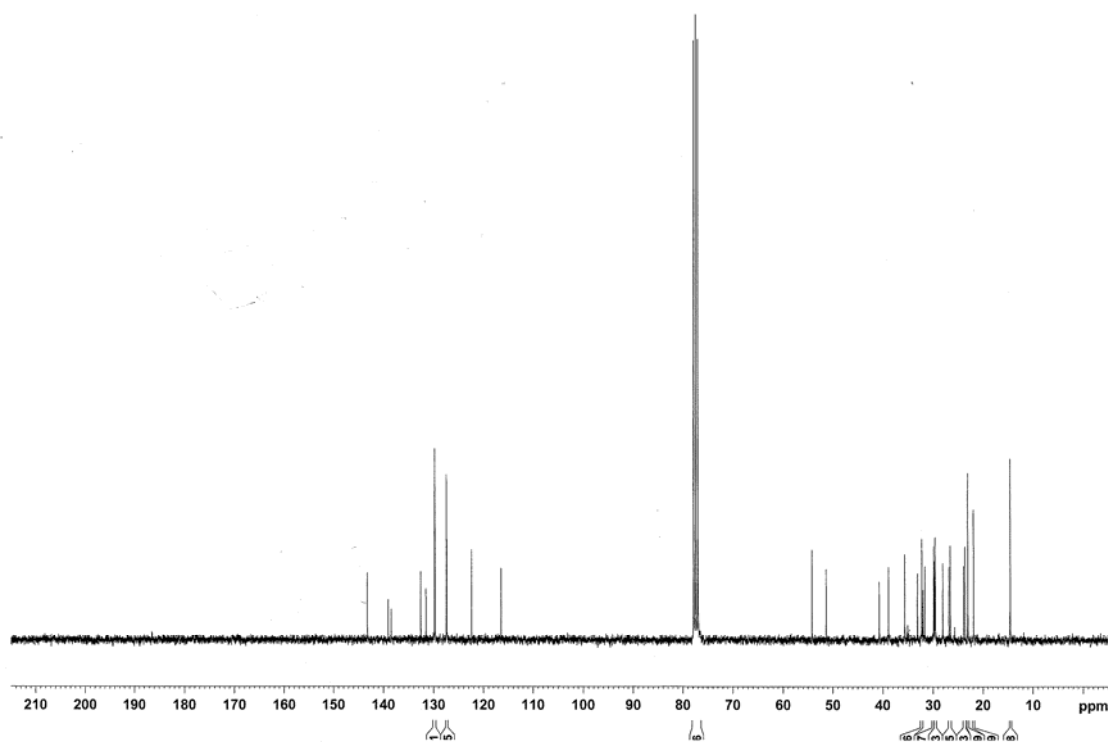

exp281.2fr17-32

"147 ol"

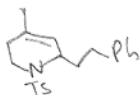

+ "146a"

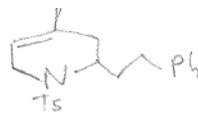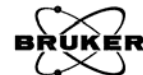

129.83  
127.63  
127.37  
122.39  
116.43

51.21  
51.76  
40.72  
38.86  
38.66  
31.13  
31.13  
31.25  
31.25  
31.25  
31.25  
29.91  
29.91  
28.74  
28.74  
28.68  
28.68  
28.58  
28.58  
22.61  
22.61  
21.55  
21.55

Current Data Parameters  
NAME exp281.2fr17-32  
EXPNO 12  
PROCNO 1

F2 - Acquisition Parameters  
Date\_ 20070516  
Time 20.53  
INSTRUM spect  
PROBHD 5 mm QNP 1H/13  
PULPROG dept135  
TD 65536  
SOLVENT CDCl3  
NS 256  
DS 4  
SWH 17985.611 Hz  
FIDRES 0.274439 Hz  
AQ 1.8219508 sec  
RG 16384  
DM 27.800 usec  
DE 6.00 usec  
TE 0.0 K  
CNST2 145.000000  
D1 2.0000000 sec  
d2 0.00444828 sec  
d12 0.00002000 sec  
DELTA 0.00001019 sec  
MCREST 0.0000000 sec  
MCWRK 0.01500000 sec

\*\*\*\*\* CHANNEL f1 \*\*\*\*\*  
NUC1 13C  
P1 8.00 usec  
p2 16.00 usec  
PL1 0.00 dB  
SFO1 75.4752953 MHz

\*\*\*\*\* CHANNEL f2 \*\*\*\*\*  
CPDPRG2 waltz16  
NUC2 1H  
P3 8.00 usec  
p4 16.00 usec  
PCPD2 100.00 usec  
PL2 0.00 dB  
PL12 23.00 dB  
SFO2 300.1312005 MHz

F2 - Processing parameters  
SI 32768  
SF 75.4677190 MHz  
WDW EM  
SSB 0  
LB 1.00 Hz  
GB 0  
PC 1.40

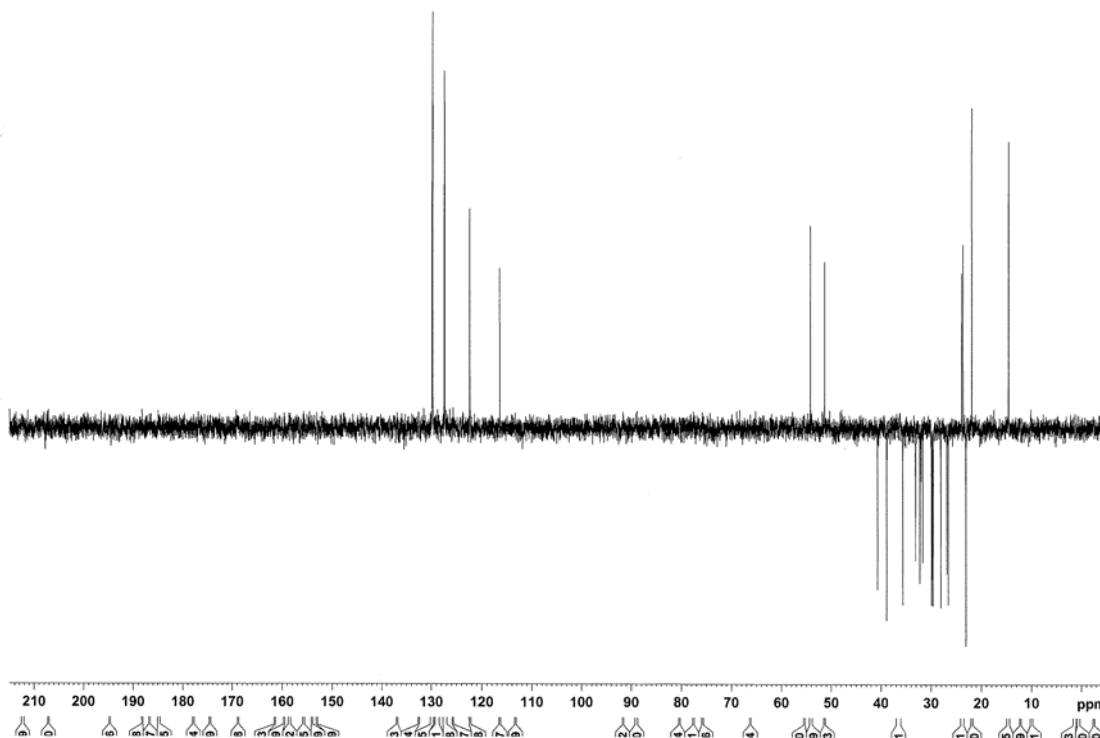

Supplement: b915797b.pdf [file b915797b.pdf]
